# Supplementary material
Source: HighWire-hosted journal article supplement (https://ard.bmj.com/content/77/9/1362)
Supplement: inline-supplementary-material-2 [file inline-supplementary-material-2.xls]

## Sheet: WA27788 NGS1149 2303 PC ExPlot 
GROUP	SYMBOL	Feature Name	SSc vs. NF log2 (fold change)	SSc vs. NF medianRPKM	SSc vs. NF adjusted P-value	PBO W24 vs. BL log2 (fold change)	PBO W24 vs. BL medianRPKM	PBO W24 vs. BL adjusted P-value	TCZ W24 vs. BL log2 (fold change)	TCZ W24 vs. BL medianRPKM	TCZ W24 vs. BL adjusted P-value
SHARED	ABCB6	ATP-binding cassette, sub-family B (MDR/TAP), member 6 (Langereis blood group)	-0.726	4.05	0.0386	-0.0137	3.66	0.965	0.75	4.98	0.0135
SHARED	ABTB1	ankyrin repeat and BTB (POZ) domain containing 1	-1.07	3.56	0.00439	0.186	2.86	0.306	0.858	4.83	0.00458
SHARED	ACLY	ATP citrate lyase	1.29	139	0.00217	-0.0201	180	0.874	-1.53	117	0.0036
SHARED	ACOX1	acyl-CoA oxidase 1, palmitoyl	1.28	8.74	0.0212	-0.0554	16.2	0.645	-1.05	5.66	0.00634
SHARED	ACOX2	acyl-CoA oxidase 2, branched chain	-1.06	2.73	0.0043	0.0885	2.67	0.768	0.699	3.36	0.0274
SHARED	ACOX3	acyl-CoA oxidase 3, pristanoyl	1.63	15.3	0.000945	0.0388	18.5	0.797	-1.67	10.3	0.00342
SHARED	ACSL1	acyl-CoA synthetase long-chain family member 1	0.907	7.79	0.00647	-0.0552	9.44	0.714	-1.1	5.83	0.00382
SHARED	ACSS2	acyl-CoA synthetase short-chain family member 2	-0.796	5.77	0.0321	0.132	5.47	0.32	0.62	6.74	0.0435
SHARED	ACTB	actin, beta	1.01	2120	0.0274	0.0102	2440	0.946	-0.938	1950	0.00822
SHARED	ACTC1	actin, alpha, cardiac muscle 1	3.14	4.12	0.02	0.313	9.81	0.102	-3.43	3.4	0.0037
SHARED	ACTN1	actinin, alpha 1	1.04	286	0.0425	0.00626	365	0.973	-1.06	236	0.00972
SHARED	ACTR3	ARP3 actin-related protein 3 homolog (yeast)	0.627	54.8	0.0178	-0.0248	48.9	0.89	-0.822	51.7	0.00877
SHARED	ADAM19	ADAM metallopeptidase domain 19	2.68	41.7	0.00238	-0.0299	52.5	0.829	-2.36	25	0.00308
SHARED	ADCK4	aarF domain containing kinase 4	-0.656	3	0.0325	0.0647	2.94	0.802	0.759	3.12	0.018
SHARED	AGPS	alkylglycerone phosphate synthase	0.708	6.9	0.00446	0.00303	9.37	0.991	-1.15	6.21	0.00669
SHARED	AHR	aryl hydrocarbon receptor	-1.44	4.56	0.017	0.00817	4.45	0.975	1.29	4.91	0.00686
SHARED	AK5	adenylate kinase 5	-1.48	4.47	0.0158	-0.0797	4.63	0.641	0.935	4.11	0.00733
SHARED	ALDH18A1	aldehyde dehydrogenase 18 family, member A1	0.708	48.3	0.0262	-0.038	55.2	0.748	-1.25	39	0.0148
SHARED	ALDH1B1	aldehyde dehydrogenase 1 family, member B1	1.79	37.2	0.000775	-0.101	44.9	0.344	-2.12	27.6	0.00324
SHARED	ALDH3A2	aldehyde dehydrogenase 3 family, member A2	-1.73	2.55	0.0239	0.0322	2.75	0.916	1.12	1.94	0.00733
SHARED	AMIGO2	adhesion molecule with Ig-like domain 2	2.11	37.7	0.00108	0.0147	40.5	0.942	-2.76	32.6	0.00338
SHARED	ANKLE2	ankyrin repeat and LEM domain containing 2	0.861	33.4	0.0273	-0.0103	36	0.949	-1.31	26.2	0.00581
SHARED	ANKRD44	ankyrin repeat domain 44	1.63	2.41	0.00127	0.0566	2.84	0.776	-1.72	2.11	0.0139
SHARED	APBB2	amyloid beta (A4) precursor protein-binding, family B, member 2	1.15	8.35	0.0204	-0.046	11.3	0.719	-1.41	5.69	0.0191
SHARED	APOL3	apolipoprotein L, 3	-2.18	1.19	0.00265	0.0542	0.718	0.891	1.78	1.58	0.00207
SHARED	ARHGAP29	Rho GTPase activating protein 29	-2.56	4.56	0.0277	-0.0296	3.8	0.882	1.39	3.38	0.00888
SHARED	ARL4C	ADP-ribosylation factor-like 4C	-0.814	2.88	0.0413	-0.17	2.69	0.429	1.11	3.72	0.0113
SHARED	ARL5B	ADP-ribosylation factor-like 5B	0.649	5.51	0.0131	-0.124	5.59	0.43	-1.08	4.24	0.00555
SHARED	ARSI	arylsulfatase family, member I	1.92	8.5	0.00147	-0.0254	10.4	0.909	-1.35	5.83	0.00237
SHARED	ASAP3	ArfGAP with SH3 domain, ankyrin repeat and PH domain 3	-0.706	4.06	0.0194	0.0258	4.16	0.926	0.99	4.41	0.00864
SHARED	ATAD3A	ATPase family, AAA domain containing 3A	0.72	6.51	0.0272	-0.00917	8.39	0.976	-0.743	5.78	0.038
SHARED	ATP1B1	ATPase, Na+/K+ transporting, beta 1 polypeptide	2.01	19.3	0.00127	-0.0889	29.9	0.437	-1.86	12.3	0.00207
SHARED	B4GALT1	UDP-Gal:betaGlcNAc beta 1,4- galactosyltransferase, polypeptide 1	1.65	115	0.0415	-0.0184	291	0.877	-1.85	59.6	0.00207
SHARED	B4GALT3	UDP-Gal:betaGlcNAc beta 1,4- galactosyltransferase, polypeptide 3	0.653	11.9	0.0239	-0.0497	13	0.742	-0.749	10.1	0.00822
SHARED	BAIAP2L1	BAI1-associated protein 2-like 1	1.48	3.09	0.04	0.0744	3.81	0.757	-1.05	2.2	0.00895
SHARED	BBS12	Bardet-Biedl syndrome 12	-1.03	2.05	0.0192	0.0639	1.67	0.864	1.08	3.19	0.0211
SHARED	BHLHE40	basic helix-loop-helix family, member e40	1.89	82.7	0.00322	-0.0688	105	0.537	-3.41	42	0.00368
SHARED	BIN1	bridging integrator 1	-1.12	5.65	0.00243	0.0642	5.63	0.724	0.728	6.82	0.0121
SHARED	BOP1	block of proliferation 1	0.681	19.2	0.0245	0.00529	23.4	0.991	-1.07	13.6	0.00972
SHARED	BTG1	B-cell translocation gene 1, anti-proliferative	-1.4	13.6	0.00219	0.0463	12.8	0.732	0.9	15.1	0.00961
SHARED	BTN3A1	butyrophilin, subfamily 3, member A1	-0.961	6.36	0.00389	-0.0345	5.52	0.897	0.723	7.98	0.0138
SHARED	BTN3A3	butyrophilin, subfamily 3, member A3	-0.885	5.9	0.00237	-0.119	5.43	0.449	0.654	6.28	0.0152
SHARED	C11orf68	chromosome 11 open reading frame 68	-0.689	29.2	0.00754	0.054	28.8	0.759	0.631	32.2	0.0183
SHARED	C14orf159	chromosome 14 open reading frame 159	-0.876	4.25	0.0158	0.0831	3.67	0.649	0.628	4.49	0.0273
SHARED	C14orf93	chromosome 14 open reading frame 93	-1.16	1.02	0.015	0.0951	1.01	0.848	1.35	1.2	0.00785
SHARED	C16orf86	chromosome 16 open reading frame 86	-1.39	1.23	0.0113	0.0294	1.17	0.979	1.3	1.36	0.009
SHARED	C18orf25	chromosome 18 open reading frame 25	0.723	4.79	0.00681	-0.116	4.95	0.323	-0.967	3.75	0.00328
SHARED	C2CD2L	C2CD2-like	0.675	3.31	0.0302	0.0447	3.62	0.842	-0.877	2.69	0.0246
SHARED	C3orf18	chromosome 3 open reading frame 18	-0.757	3.13	0.0431	-0.00933	2.87	0.986	1.05	4.12	0.00508
SHARED	C9orf9	chromosome 9 open reading frame 9	-0.748	1.81	0.0295	0.205	1.72	0.469	0.626	2.24	0.0424
SHARED	C9orf91	chromosome 9 open reading frame 91	1.21	4.08	0.0204	-0.0149	6.13	0.947	-1.3	3.02	0.0196
SHARED	CACHD1	cache domain containing 1	1.91	5.52	0.00556	-0.0847	6.79	0.554	-2.08	3.35	0.00688
SHARED	CACNA1C	calcium channel, voltage-dependent, L type, alpha 1C subunit	1.31	4.46	0.017	0.0616	6.33	0.594	-1.12	3.13	0.0269
SHARED	CALB2	calbindin 2	2.74	1.38	0.0222	-0.189	1.5	0.636	-1.8	1.4	0.00443
SHARED	CALHM2	calcium homeostasis modulator 2	-1.16	15.5	0.00326	0.0739	15.5	0.524	0.69	12.7	0.0106
SHARED	CAMK2D	calcium/calmodulin-dependent protein kinase II delta	-1.1	8.15	0.00326	-0.0902	5.51	0.456	0.661	8.63	0.0346
SHARED	CAP1	CAP, adenylate cyclase-associated protein 1 (yeast)	0.602	144	0.0296	0.00235	134	0.993	-0.688	139	0.0254
SHARED	CARD6	caspase recruitment domain family, member 6	-1.1	3.47	0.000632	0.0679	3.02	0.758	0.933	3.72	0.00997
SHARED	CASP9	caspase 9, apoptosis-related cysteine peptidase	-0.788	1.05	0.0119	-0.0208	0.89	0.973	0.791	1.1	0.022
SHARED	CBX7	chromobox homolog 7	-0.916	1.31	0.0048	-0.006	1.18	0.993	0.721	1.37	0.0474
SHARED	CCDC127	coiled-coil domain containing 127	-0.676	7.18	0.0069	0.0383	6.47	0.89	0.676	8.76	0.0243
SHARED	CCHCR1	coiled-coil alpha-helical rod protein 1	-0.72	1.82	0.0168	0.0939	2	0.676	0.935	2.23	0.00457
SHARED	CCNG1	cyclin G1	-0.868	46.4	0.0227	-0.0433	38.3	0.824	0.589	51.1	0.0298
SHARED	CD3EAP	CD3e molecule, epsilon associated protein	0.823	10.5	0.0357	-0.0679	10.8	0.625	-1.38	7.12	0.00457
SHARED	CDC25B	cell division cycle 25B	-1.23	5.57	0.00246	0.077	4.89	0.636	1.56	6.96	0.0053
SHARED	CDC42EP4	CDC42 effector protein (Rho GTPase binding) 4	-2.02	3.69	0.000117	-0.0231	3.64	0.932	1.63	7.66	0.00237
SHARED	CDH2	cadherin 2, type 1, N-cadherin (neuronal)	2.37	71.1	0.00019	-0.0325	113	0.803	-2.48	46.8	0.00459
SHARED	CDK14	cyclin-dependent kinase 14	0.693	11.1	0.0415	-0.118	13.7	0.311	-0.82	8.36	0.00898
SHARED	CDKL5	cyclin-dependent kinase-like 5	1.32	1.93	0.0196	-0.072	2.35	0.636	-1.69	1.36	0.00315
SHARED	CENPN	centromere protein N	0.743	7.4	0.0209	-0.0024	7.37	0.994	-0.916	7.44	0.03
SHARED	CHFR	checkpoint with forkhead and ring finger domains, E3 ubiquitin protein ligase	0.668	9.03	0.00311	-0.0196	9.74	0.933	-0.674	8.67	0.0275
SHARED	CHMP2B	charged multivesicular body protein 2B	0.942	22.8	0.048	-0.036	22.4	0.859	-0.782	29.6	0.0248
SHARED	CHSY3	chondroitin sulfate synthase 3	2.57	2.52	0.00638	-0.128	4	0.422	-2.49	2.02	0.00324
SHARED	CMBL	carboxymethylenebutenolidase homolog (Pseudomonas)	-0.981	4.78	0.0492	0.0318	3.08	0.92	0.938	7.26	0.0165
SHARED	CNIH3	cornichon family AMPA receptor auxiliary protein 3	-2.6	1.09	5.5e-05	-0.157	0.865	0.697	1.16	1.74	0.0344
SHARED	CNN1	calponin 1, basic, smooth muscle	2.51	67.4	0.00341	0.0823	75.4	0.511	-1.58	72.4	0.00483
SHARED	CPEB4	cytoplasmic polyadenylation element binding protein 4	1.14	4	0.017	-0.116	4.18	0.312	-1.47	2.64	0.00533
SHARED	CREB3L2	cAMP responsive element binding protein 3-like 2	1.15	56.3	0.0269	-0.0665	61.5	0.48	-1.55	36.1	0.00443
SHARED	CRISPLD2	cysteine-rich secretory protein LCCL domain containing 2	2.18	59.9	0.0416	0.102	92	0.456	-1.57	37.2	0.00254
SHARED	CRY1	cryptochrome circadian clock 1	1.48	15.4	0.000224	-0.0559	15.5	0.725	-1.86	11.2	0.00207
SHARED	CSGALNACT2	chondroitin sulfate N-acetylgalactosaminyltransferase 2	0.82	11.4	0.0326	-0.102	11.9	0.397	-1.39	8.6	0.00504
SHARED	CSRNP1	cysteine-serine-rich nuclear protein 1	1.17	19.9	0.0254	-0.055	20.2	0.638	-2.3	10.5	0.00237
SHARED	CTGF	connective tissue growth factor	1.83	2460	0.0023	-0.0442	3980	0.697	-3.29	1690	0.00324
SHARED	CTPS1	CTP synthase 1	2.54	24.2	0.00103	-0.0295	24.9	0.833	-3.14	15.4	0.00338
SHARED	DACT1	dishevelled-binding antagonist of beta-catenin 1	1.89	21.7	0.0261	0.0793	35.8	0.558	-2.71	16.7	0.00343
SHARED	DAPK3	death-associated protein kinase 3	1.1	36.8	0.0276	0.0192	42	0.932	-1.08	26.7	0.0128
SHARED	DCBLD1	discoidin, CUB and LCCL domain containing 1	1.36	22.9	0.02	0.0267	24.9	0.848	-1.82	16.1	0.00308
SHARED	DCLK2	doublecortin-like kinase 2	1.61	5.32	0.00237	0.156	8.23	0.145	-1.92	3.93	0.00207
SHARED	DENND1B	DENN/MADD domain containing 1B	0.897	1.2	0.0359	-0.0485	1.93	0.869	-0.838	1.01	0.0247
SHARED	DFNB31	deafness, autosomal recessive 31	1.61	2.64	0.0131	0.0529	4.33	0.769	-1.79	1.79	0.00939
SHARED	DNAJB2	DnaJ (Hsp40) homolog, subfamily B, member 2	-0.615	8.2	0.037	0.0888	8.57	0.51	0.716	9.34	0.0145
SHARED	DNAJB5	DnaJ (Hsp40) homolog, subfamily B, member 5	1.61	19	0.000201	-0.0842	21.5	0.433	-1.6	10.3	0.00207
SHARED	DPYSL2	dihydropyrimidinase-like 2	-1.41	22.1	0.0321	-0.0333	22.7	0.86	0.816	13.6	0.0257
SHARED	DUSP1	dual specificity phosphatase 1	1.63	67.3	0.0393	-0.0757	71.9	0.487	-1.86	29.2	0.00237
SHARED	DUSP6	dual specificity phosphatase 6	-3.17	3.69	0.00406	-0.215	3.34	0.429	1.22	4.34	0.0263
SHARED	E2F7	E2F transcription factor 7	1.23	4.52	0.037	0.0282	4.89	0.885	-1.54	1.98	0.00792
SHARED	EDN1	endothelin 1	2.96	6.43	0.0137	0.0069	6.8	0.987	-3.78	4.72	0.00338
SHARED	EDNRA	endothelin receptor type A	1.25	3.73	0.0326	-0.129	3.77	0.45	-0.894	2.81	0.00752
SHARED	EFNB1	ephrin-B1	-1.82	5.72	0.00364	0.0721	4.33	0.68	1.1	7.75	0.00373
SHARED	EIF3J	eukaryotic translation initiation factor 3, subunit J	0.695	20.3	0.0222	-0.0894	20.8	0.487	-1.23	14.2	0.00324
SHARED	ELN	elastin	1.71	304	0.0043	0.122	404	0.295	-2.61	222	0.0128
SHARED	ENAH	enabled homolog (Drosophila)	1.1	14.9	0.017	-0.0553	19.1	0.644	-1.23	11.7	0.00606
SHARED	ENKD1	enkurin domain containing 1	-0.808	4.35	0.0302	0.0913	4.14	0.728	0.695	3.84	0.0137
SHARED	ERCC2	excision repair cross-complementation group 2	0.866	14.1	0.00876	-0.031	15.7	0.847	-0.604	10.7	0.0202
SHARED	ERMAP	erythroblast membrane-associated protein (Scianna blood group)	-0.712	4.89	0.0408	-0.0197	4.94	0.94	0.983	6.35	0.00663
SHARED	ERN1	endoplasmic reticulum to nucleus signaling 1	1.18	3.26	0.036	-0.0207	4.43	0.921	-1.61	2.42	0.0136
SHARED	ETV1	ets variant 1	-1.58	1.42	0.0233	-0.262	1.18	0.132	1.24	1.89	0.00749
SHARED	EVI5	ecotropic viral integration site 5	0.922	3.91	0.0106	-0.0759	4.23	0.613	-0.974	3.19	0.0196
SHARED	FABP3	fatty acid binding protein 3, muscle and heart (mammary-derived growth inhibitor)	-1.95	2.8	0.00966	-0.0924	1.12	0.869	0.998	2.97	0.0437
SHARED	FAM110B	family with sequence similarity 110, member B	-1.85	1.59	0.00766	0.207	1.65	0.227	1.88	2.13	0.00338
SHARED	FAM111A	family with sequence similarity 111, member A	-1.21	3.38	0.00103	-0.0555	3.09	0.817	0.922	3.36	0.00496
SHARED	FAM168A	family with sequence similarity 168, member A	1.06	14.6	0.0483	0.0372	30.9	0.763	-0.898	10.7	0.0245
SHARED	FAM214B	family with sequence similarity 214, member B	1.27	16.4	0.000745	0.128	18	0.196	-1.12	11.5	0.00405
SHARED	FARSA	phenylalanyl-tRNA synthetase, alpha subunit	0.592	29.1	0.0148	-0.0355	29.9	0.86	-0.796	20.7	0.00933
SHARED	FAXDC2	fatty acid hydroxylase domain containing 2	-0.652	3.31	0.0302	0.0178	3.09	0.943	0.991	3.42	0.0179
SHARED	FERMT2	fermitin family member 2	0.864	76.6	0.022	0.000895	76.2	0.998	-1.4	62.8	0.00207
SHARED	FES	FES proto-oncogene, tyrosine kinase	-1.49	1.7	0.000773	0.11	1.71	0.7	1.02	1.73	0.00702
SHARED	FLT3LG	fms-related tyrosine kinase 3 ligand	-1.3	4.16	0.00287	0.0191	3.46	0.969	1.04	4.96	0.00368
SHARED	FNIP2	folliculin interacting protein 2	1.78	4.53	0.0069	-0.104	4.63	0.32	-2.43	2	0.00308
SHARED	FOXN3		1.41	11.7	0.0391	-0.106	15.2	0.262	-1.22	6.03	0.014
SHARED	FOXP1	forkhead box P1	1.21	8.72	0.017	-0.0793	10	0.455	-1.17	5.66	0.00803
SHARED	FRMD6	FERM domain containing 6	1.16	237	0.0212	-0.135	273	0.106	-1.51	143	0.005
SHARED	FSTL3	follistatin-like 3 (secreted glycoprotein)	2.52	56.5	0.0043	0.0698	67.3	0.589	-3.24	32.3	0.00207
SHARED	FXR2	fragile X mental retardation, autosomal homolog 2	0.752	19.7	0.0367	0.00381	23.1	0.99	-1.01	12.8	0.0097
SHARED	GADD45B	growth arrest and DNA-damage-inducible, beta	3.09	117	2.02e-06	0.0566	135	0.59	-3.17	47.7	0.00207
SHARED	GALNT10	polypeptide N-acetylgalactosaminyltransferase 10	1.58	43.5	0.0034	-0.0206	74.2	0.877	-1.66	31.9	0.00636
SHARED	GALT	galactose-1-phosphate uridylyltransferase	-0.794	6.31	0.0119	0.0197	6.04	0.963	0.764	8.7	0.0128
SHARED	GFPT1	glutamine--fructose-6-phosphate transaminase 1	0.597	18.2	0.0196	-0.067	19.9	0.473	-0.877	14.7	0.00669
SHARED	GLIPR2	GLI pathogenesis-related 2	1.13	41.5	0.0022	-0.0578	51.9	0.619	-1.07	38.3	0.00464
SHARED	GLIS3	GLIS family zinc finger 3	1.89	13.3	0.00918	-0.0479	15	0.699	-2.42	4.76	0.00457
SHARED	GMPPB	GDP-mannose pyrophosphorylase B	0.72	13.4	0.0343	-0.031	16.5	0.877	-0.68	11	0.0187
SHARED	GOLIM4	golgi integral membrane protein 4	0.9	29.5	0.0118	-0.06	30.9	0.588	-1.2	19.9	0.00405
SHARED	GOPC	golgi-associated PDZ and coiled-coil motif containing	1.03	22.3	0.00311	0.00187	27	0.995	-1.29	18.9	0.00969
SHARED	GPER1	G protein-coupled estrogen receptor 1	-1.28	1.21	0.00475	-0.0694	0.906	0.887	0.896	1.09	0.0377
SHARED	GPSM2	G-protein signaling modulator 2	-1.96	2.06	0.0101	0.172	2.07	0.409	1.33	2.58	0.00774
SHARED	GTPBP4	GTP binding protein 4	0.875	27.5	0.00728	-0.0638	30	0.61	-1.28	19.4	0.00385
SHARED	HBEGF	heparin-binding EGF-like growth factor	2.93	35.2	0.019	-0.288	37.7	0.113	-4.79	12.4	0.00237
SHARED	HDGFRP3	hepatoma-derived growth factor, related protein 3	0.979	21.4	0.0193	-0.0408	23.4	0.797	-0.991	17.4	0.00461
SHARED	HIF1A	hypoxia inducible factor 1, alpha subunit (basic helix-loop-helix transcription factor)	1.43	186	0.00394	-0.0221	201	0.891	-1.31	104	0.00325
SHARED	HOMER1	homer homolog 1 (Drosophila)	1.65	5.94	0.00302	-0.205	6.01	0.122	-2.24	3.46	0.00254
SHARED	HSPB1	heat shock 27kDa protein 1	1.01	537	0.0335	0.174	612	0.174	-0.841	427	0.021
SHARED	ID1	inhibitor of DNA binding 1, dominant negative helix-loop-helix protein	3.6	29.9	0.000281	0.0305	60.9	0.881	-3.38	15.7	0.00237
SHARED	ID3	inhibitor of DNA binding 3, dominant negative helix-loop-helix protein	3.83	56.1	0.000101	0.0954	85.9	0.467	-3.44	23	0.00169
SHARED	IFFO1	intermediate filament family orphan 1	-0.895	5.78	0.00403	0.0699	4.44	0.686	0.877	7.11	0.00733
SHARED	IFI16	interferon, gamma-inducible protein 16	-1.26	22.3	0.0293	-0.107	20.2	0.628	1.3	25.4	0.01
SHARED	IGDCC4	immunoglobulin superfamily, DCC subclass, member 4	-1.03	1.09	0.0474	-0.0529	0.945	0.878	0.813	1.47	0.0347
SHARED	IGF2BP1	insulin-like growth factor 2 mRNA binding protein 1	1.44	1.42	0.0276	0.0871	2.44	0.517	-0.956	1.17	0.0223
SHARED	IKBKE	inhibitor of kappa light polypeptide gene enhancer in B-cells, kinase epsilon	-1.39	3.65	0.00495	0.0285	2.48	0.933	0.925	4.5	0.00472
SHARED	IL11	interleukin 11	4.04	98.9	0.00251	-0.222	92.8	0.157	-5.78	36.2	0.00277
SHARED	INHBA	inhibin, beta A	1.67	82.1	0.0352	-0.152	102	0.127	-2.6	58	0.00207
SHARED	IRF2	interferon regulatory factor 2	-1.41	5.37	0.00237	0.0146	4.8	0.967	1.52	6.96	0.00527
SHARED	ITGA5	integrin, alpha 5 (fibronectin receptor, alpha polypeptide)	0.908	209	0.0267	-0.00849	240	0.957	-1.29	188	0.00857
SHARED	ITGAV	integrin, alpha V	0.867	66.2	0.0012	-0.0661	64.5	0.605	-0.876	62.6	0.00997
SHARED	IVNS1ABP	influenza virus NS1A binding protein	1.41	26.4	0.0213	0.00735	40.4	0.978	-1.33	21.2	0.00421
SHARED	JADE2	jade family PHD finger 2	-2.06	1.56	0.00177	0.084	0.843	0.756	1.42	1.96	0.00389
SHARED	JMJD6	jumonji domain containing 6	0.839	5.15	0.0391	0.0322	5.15	0.852	-1.43	4.47	0.00237
SHARED	JPH2	junctophilin 2	1.59	4.42	0.0398	0.048	5.07	0.775	-1.99	3.3	0.00701
SHARED	JUNB	jun B proto-oncogene	2.06	178	0.0201	-0.0346	205	0.828	-2.77	65	0.00207
SHARED	KANK1	KN motif and ankyrin repeat domains 1	1.38	6.31	0.000862	0.0849	8.1	0.489	-1.65	4.56	0.00324
SHARED	KANK4	KN motif and ankyrin repeat domains 4	7.57	1.46	0.00738	0.103	6.6	0.619	-4.75	1.04	0.00207
SHARED	KCNG1	potassium voltage-gated channel, subfamily G, member 1	2	14.4	0.00354	-0.18	19.1	0.178	-3.01	8.86	0.005
SHARED	KCTD11	potassium channel tetramerization domain containing 11	1.25	31.9	0.0324	-0.0696	33.9	0.644	-2.19	14.1	0.00237
SHARED	KDM6B	lysine (K)-specific demethylase 6B	2.48	11.5	0.0069	-0.0481	14.8	0.722	-2.93	5.09	0.00342
SHARED	KDM7A	lysine (K)-specific demethylase 7A	1.62	2.69	0.0078	-0.123	4.28	0.375	-2.22	1.23	0.00254
SHARED	KIAA0020	KIAA0020	0.91	17.2	0.00238	-0.0461	17.6	0.782	-1.25	13.6	0.00332
SHARED	KIAA1614	KIAA1614	-0.755	1.31	0.0386	0.12	1.44	0.652	0.953	1.31	0.00933
SHARED	KIF26B		1.86	6.24	0.0176	0.0168	9.61	0.927	-2.02	4.57	0.0221
SHARED	KIF5B	kinesin family member 5B	0.659	37.7	0.0147	-0.00893	41	0.964	-0.86	31.2	0.00876
SHARED	KIFC3	kinesin family member C3	0.928	10.1	0.0213	0.0143	12	0.944	-1.41	7.54	0.00972
SHARED	KITLG	KIT ligand	-1.8	8.86	0.0114	0.0427	8.34	0.83	1.46	9.85	0.00852
SHARED	KLC3	kinesin light chain 3	0.938	2.55	0.0263	0.041	3.42	0.897	-1.05	1.96	0.0172
SHARED	KLF10	Kruppel-like factor 10	2.4	41.8	0.000283	-0.0412	47.7	0.776	-2.3	23.1	0.00226
SHARED	KLF4	Kruppel-like factor 4 (gut)	-1.78	4.62	0.000745	-0.0147	3.86	0.954	1.37	4.83	0.00569
SHARED	KLF7	Kruppel-like factor 7 (ubiquitous)	1.57	8.43	0.0127	-0.0364	12.9	0.821	-1.76	5.63	0.00514
SHARED	KRT19	keratin 19	-2.43	4.74	0.00912	0.0922	4.36	0.713	1.42	6.37	0.00308
SHARED	LARGE	like-glycosyltransferase	1.37	9.66	0.01	-0.0392	11.2	0.76	-1.17	4.52	0.012
SHARED	LEPREL1	leprecan-like 1	2.01	8.49	0.0212	-0.00428	8.57	0.991	-2.55	5.25	0.00309
SHARED	LETMD1	LETM1 domain containing 1	-0.971	6.07	0.00975	-0.0413	5.33	0.861	0.831	8.3	0.00554
SHARED	LIF	leukemia inhibitory factor	4.41	19.2	0.0224	-0.293	19.2	0.193	-3.47	16.2	0.00288
SHARED	LIMD1	LIM domains containing 1	-0.967	3.15	0.0483	0.0325	1.96	0.882	0.671	3.91	0.044
SHARED	LIMK1	LIM domain kinase 1	0.945	35.3	0.0296	-0.0727	44.2	0.527	-1.21	23.5	0.00749
SHARED	LIMK2	LIM domain kinase 2	1.84	9.76	0.000134	0.101	12.4	0.334	-1.66	7.78	0.00208
SHARED	LIMS1	LIM and senescent cell antigen-like domains 1	0.645	17.1	0.0448	-0.163	17.8	0.328	-1.65	16.8	0.0034
SHARED	LMCD1	LIM and cysteine-rich domains 1	1.32	73.5	0.0108	-0.0943	78.5	0.422	-2.4	54.7	0.00207
SHARED	LMO4	LIM domain only 4	1.18	27.1	0.00228	-0.106	29.6	0.296	-0.805	23.4	0.00672
SHARED	LOC102724147	uncharacterized LOC102724147	1.96	18.6	0.00217	0.102	21.4	0.589	-2.77	15.2	0.0037
SHARED	LOC102724164	uncharacterized LOC102724164	-0.811	1.83	0.017	-0.00965	1.62	0.992	0.609	2.14	0.0335
SHARED	LOC102724376	uncharacterized LOC102724376	1.88	2.6	0.00622	0.00863	3.04	0.993	-1.5	1.39	0.0251
SHARED	LOC102724641	glycine, alanine and asparagine-rich protein-like	1.37	18.5	0.0393	-0.00146	25.9	0.998	-1.29	15.3	0.00338
SHARED	LPIN1	lipin 1	-1.21	2.93	0.00208	0.00858	2.34	0.98	0.998	3.32	0.0187
SHARED	LRP12	low density lipoprotein receptor-related protein 12	1.06	16.4	0.0181	-0.0885	19.1	0.493	-1.5	11.7	0.00338
SHARED	MAK16	MAK16 homolog (S. cerevisiae)	0.617	13.8	0.0158	-0.0901	13.6	0.48	-1.25	11.3	0.00254
SHARED	MANF	mesencephalic astrocyte-derived neurotrophic factor	0.658	56.4	0.0392	-0.0277	60.5	0.9	-0.917	45.7	0.00669
SHARED	MAP2K1	mitogen-activated protein kinase kinase 1	0.782	26.1	0.00237	-0.0841	26.6	0.485	-1.03	19.3	0.00308
SHARED	MAPK8	mitogen-activated protein kinase 8	0.81	6.04	0.00868	-0.047	6.06	0.781	-1.07	5.17	0.00308
SHARED	MAPRE2	microtubule-associated protein, RP/EB family, member 2	-0.794	3.29	0.0169	-0.0196	3.24	0.94	0.69	3.38	0.0436
SHARED	MEX3B	mex-3 RNA binding family member B	1.95	7.99	0.00684	0.189	10.1	0.216	-1.34	4.84	0.0112
SHARED	MFSD12	major facilitator superfamily domain containing 12	1.01	25.7	0.0222	-0.00475	27.3	0.99	-1.55	18.8	0.00405
SHARED	MKL2	MKL/myocardin-like 2	-0.838	1.3	0.0472	0.0423	1.34	0.851	0.843	1.26	0.0187
SHARED	MLXIP	MLX interacting protein	1.25	16.5	0.0219	-0.00142	19.3	0.996	-1.34	8.93	0.00962
SHARED	MOB3C	MOB kinase activator 3C	-0.842	1.72	0.0119	-0.0208	1.6	0.953	0.74	2.08	0.00672
SHARED	MRAP	melanocortin 2 receptor accessory protein	1.06	2.55	0.026	-0.0575	3.15	0.87	-1.31	1.49	0.00952
SHARED	MRAS	muscle RAS oncogene homolog	1.07	32.4	0.0377	-0.0609	40.9	0.577	-1.64	28.7	0.00254
SHARED	MSANTD3	Myb/SANT-like DNA-binding domain containing 3	0.672	29.2	0.0463	-0.0857	28.5	0.487	-0.788	30.3	0.0128
SHARED	MSANTD3-TMEFF1	MSANTD3-TMEFF1 readthrough	0.789	18.7	0.00208	-0.082	19.4	0.621	-0.909	14.8	0.00672
SHARED	MTCH1	mitochondrial carrier 1	1.04	120	0.0023	0.0655	161	0.509	-0.747	114	0.0157
SHARED	MTFP1	mitochondrial fission process 1	1.46	5.5	0.00158	-0.0907	5.69	0.679	-1.34	5.52	0.0114
SHARED	MURC	muscle-related coiled-coil protein	3.95	6.67	0.00131	-0.15	8.86	0.43	-4.84	1.78	0.00254
SHARED	MYO10	myosin X	1.88	28.7	0.0209	-0.0868	29.5	0.487	-1.94	11.3	0.00733
SHARED	MZF1	myeloid zinc finger 1	-0.679	1.83	0.037	-0.0171	1.45	0.976	0.61	2.04	0.0252
SHARED	NAALADL1	N-acetylated alpha-linked acidic dipeptidase-like 1	-0.968	1.97	0.0119	0.0859	1.67	0.788	0.823	3.01	0.0242
SHARED	NEDD9	neural precursor cell expressed, developmentally down-regulated 9	1.82	29.7	0.0244	-0.0796	41.3	0.417	-2.14	17.4	0.00329
SHARED	NETO2	neuropilin (NRP) and tolloid (TLL)-like 2	0.848	2.06	0.0463	-0.25	2.24	0.0985	-0.877	1.76	0.0195
SHARED	NEXN	nexilin (F actin binding protein)	1.37	9.37	0.0231	0.0489	9.3	0.787	-1.02	9.85	0.00933
SHARED	NGF	nerve growth factor (beta polypeptide)	1.7	28.8	0.00643	-0.0156	32.4	0.949	-3.1	23.8	0.00331
SHARED	NHEJ1	nonhomologous end-joining factor 1	-0.616	3.11	0.0174	-0.00262	2.91	0.997	0.689	3.67	0.0124
SHARED	NME7	NME/NM23 family member 7	0.721	9.18	0.00495	-0.0376	9.49	0.862	-0.612	8.28	0.0166
SHARED	NOX4	NADPH oxidase 4	2.92	3.86	0.00626	-0.0592	3.71	0.783	-3.36	1.1	0.00405
SHARED	NR1D1	nuclear receptor subfamily 1, group D, member 1	-1.64	1.74	0.00349	0.146	1.65	0.651	1.09	3.12	0.00656
SHARED	NR1D2	nuclear receptor subfamily 1, group D, member 2	-1.21	5.21	0.0092	0.128	4.75	0.322	0.899	6.25	0.011
SHARED	NR2F2	nuclear receptor subfamily 2, group F, member 2	-2.06	4.76	0.000886	0.145	4.53	0.341	1.54	9.86	0.00822
SHARED	NUAK1	NUAK family, SNF1-like kinase, 1	1.71	9.94	0.0129	-0.0442	25.1	0.714	-2.28	7.33	0.00733
SHARED	NUS1	nuclear undecaprenyl pyrophosphate synthase 1 homolog (S. cerevisiae)	0.78	1.86	0.0227	-0.149	2.09	0.386	-1.07	1.36	0.0113
SHARED	NXPH4	neurexophilin 4	1.6	8.38	0.0258	-0.0213	16.3	0.911	-2.52	5.84	0.00398
SHARED	ODF3B	outer dense fiber of sperm tails 3B	-1.45	3.33	0.0134	-0.0531	2.99	0.9	0.889	3.47	0.00581
SHARED	OLFM2	olfactomedin 2	3.32	63.6	0.00264	-0.167	85.5	0.165	-3.15	43.4	0.00254
SHARED	ORAI1	ORAI calcium release-activated calcium modulator 1	-0.728	5.77	0.00197	0.162	5.42	0.455	0.83	6.57	0.0143
SHARED	ORMDL3	ORMDL sphingolipid biosynthesis regulator 3	0.758	25.7	0.0107	-0.0668	27.5	0.61	-0.603	21.2	0.0317
SHARED	OSR2	odd-skipped related transciption factor 2	-2.55	1.28	0.00553	0.161	0.623	0.742	1.88	1.46	0.00207
SHARED	OTUD6B	OTU domain containing 6B	0.831	2.58	0.00339	-0.0102	2.64	0.989	-0.609	2.08	0.0179
SHARED	P4HA3	prolyl 4-hydroxylase, alpha polypeptide III	1.58	10.5	0.00117	0.0192	12.2	0.918	-1.42	9.19	0.00678
SHARED	PAWR	PRKC, apoptosis, WT1, regulator	1.47	10.8	0.000178	-0.0255	13.7	0.899	-2.36	7.24	0.00248
SHARED	PBX2		-0.67	2.38	0.00546	0.0613	2.56	0.815	0.918	2.81	0.00424
SHARED	PCED1B	PC-esterase domain containing 1B	1.44	3.49	0.00553	0.0507	4.78	0.841	-1.84	3.31	0.00619
SHARED	PCGF3	polycomb group ring finger 3	0.789	7.18	0.0091	0.00576	7.86	0.98	-0.668	5.26	0.0218
SHARED	PCSK7	proprotein convertase subtilisin/kexin type 7	1.38	13.9	0.0043	0.0292	14.6	0.828	-1.07	13.5	0.00733
SHARED	PDCL3	phosducin-like 3	0.701	5.66	0.0233	0.0238	6.48	0.947	-0.649	5.39	0.0267
SHARED	PDGFRA	platelet-derived growth factor receptor, alpha polypeptide	-1.51	62.1	0.00354	-0.0233	61	0.864	0.841	50.7	0.0174
SHARED	PDLIM4	PDZ and LIM domain 4	1.24	50.5	0.0012	-0.0583	50.6	0.622	-1.54	40	0.00254
SHARED	PDLIM7	PDZ and LIM domain 7 (enigma)	0.941	127	0.0161	0.107	141	0.349	-0.797	134	0.0212
SHARED	PDSS1	prenyl (decaprenyl) diphosphate synthase, subunit 1	0.914	1.53	0.0205	-0.112	1.62	0.764	-0.867	1.25	0.0272
SHARED	PER3	period circadian clock 3	-1.27	1.66	0.0128	0.144	1.66	0.462	0.773	1.39	0.0268
SHARED	PFKP	phosphofructokinase, platelet	1.15	48.7	0.0201	0.0513	50.6	0.714	-1.07	29	0.00636
SHARED	PGBD1	piggyBac transposable element derived 1	0.698	3.33	0.00629	-0.00508	3.55	0.991	-0.741	2.75	0.00962
SHARED	PGM2	phosphoglucomutase 2	1.12	6.11	0.0012	-0.14	7.15	0.285	-0.739	6.09	0.0073
SHARED	PGM2L1	phosphoglucomutase 2-like 1	1.37	3.97	0.0142	-0.0661	5.32	0.632	-2.28	2.59	0.00338
SHARED	PGM3	phosphoglucomutase 3	0.627	30.5	0.00831	-0.0884	30.1	0.296	-0.854	27	0.00928
SHARED	PHF21A	PHD finger protein 21A	-0.834	2.05	0.0481	0.0361	1.97	0.893	1.25	3.06	0.00508
SHARED	PHTF2	putative homeodomain transcription factor 2	1.12	11.4	0.00143	-0.117	12.3	0.338	-1.14	8.1	0.00413
SHARED	PIGW	phosphatidylinositol glycan anchor biosynthesis, class W	0.805	4.02	0.00569	-0.175	4.56	0.226	-0.765	3.23	0.0133
SHARED	PITPNC1	phosphatidylinositol transfer protein, cytoplasmic 1	1.16	2.25	0.0302	-0.0377	3.53	0.827	-0.816	2.03	0.0209
SHARED	PLA2G6	phospholipase A2, group VI (cytosolic, calcium-independent)	-0.942	1.08	0.0146	0.143	1.01	0.74	1.06	1.31	0.00493
SHARED	PLEK2	pleckstrin 2	1.55	6.79	0.0283	-0.0238	8.95	0.939	-1.89	6.18	0.0114
SHARED	PLEKHA1	pleckstrin homology domain containing, family A (phosphoinositide binding specific) member 1	0.642	7.48	0.012	-0.00123	8.24	0.998	-0.895	5.31	0.00759
SHARED	PLEKHF1	pleckstrin homology domain containing, family F (with FYVE domain) member 1	-1.83	1.64	0.0136	0.0285	1.37	0.957	2.19	2.83	0.00733
SHARED	PLEKHH3	pleckstrin homology domain containing, family H (with MyTH4 domain) member 3	-0.749	2.4	0.014	0.156	2.17	0.617	0.604	2.75	0.0139
SHARED	PLEKHO1	pleckstrin homology domain containing, family O member 1	1.02	41.9	0.00546	0.0632	43.8	0.674	-0.943	31.3	0.00328
SHARED	PLIN2	perilipin 2	-0.942	11	0.0114	0.0872	10.8	0.504	1.18	12.9	0.00669
SHARED	PLK2	polo-like kinase 2	-0.883	12.5	0.0445	0.0253	10.9	0.884	1.35	22.6	0.0431
SHARED	PLOD2	procollagen-lysine, 2-oxoglutarate 5-dioxygenase 2	0.988	63.5	0.0212	-0.012	72.5	0.954	-1.64	44.9	0.00333
SHARED	PLXDC2	plexin domain containing 2	2.38	3.18	0.0483	-0.0643	4.68	0.676	-2.44	2.23	0.00684
SHARED	PMEPA1	prostate transmembrane protein, androgen induced 1	2.36	34.9	0.00168	-0.0283	54	0.819	-4.22	22.1	0.00324
SHARED	PNMA1	paraneoplastic Ma antigen 1	0.822	49.2	0.0108	0.0303	54.8	0.813	-1.27	34.7	0.00308
SHARED	PNP	purine nucleoside phosphorylase	1.67	15.2	0.0276	-0.106	14.9	0.414	-1.79	12.9	0.014
SHARED	PPAPDC1A	phosphatidic acid phosphatase type 2 domain containing 1A	2.85	12.3	0.00217	0.0682	19.6	0.591	-2.19	11.1	0.00409
SHARED	PPFIA1	protein tyrosine phosphatase, receptor type, f polypeptide (PTPRF), interacting protein (liprin), alpha 1	0.823	10.5	0.00364	0.00185	11.5	0.995	-0.841	8.24	0.0112
SHARED	PPP1R13L	protein phosphatase 1, regulatory subunit 13 like	1.88	11.8	0.00346	0.107	17.4	0.463	-2.38	7.98	0.00308
SHARED	PPP1R3B	protein phosphatase 1, regulatory subunit 3B	1.4	3.81	0.0257	-0.14	6.66	0.23	-1.19	2.68	0.0072
SHARED	PPP2R5A	protein phosphatase 2, regulatory subunit B', alpha	-0.864	4.79	0.00032	0.0118	4.68	0.969	0.61	5.43	0.0141
SHARED	PPT2		-0.994	3.74	0.00426	0.0819	3.76	0.745	0.937	5.83	0.00656
SHARED	PRDM8	PR domain containing 8	-1.54	2.27	0.00131	0.0926	1.38	0.679	1.3	2.93	0.0034
SHARED	PRICKLE1	prickle homolog 1 (Drosophila)	1.44	4.82	0.0436	-0.111	7.98	0.491	-1.15	3.76	0.0124
SHARED	PRICKLE2	prickle homolog 2 (Drosophila)	1.1	5.17	0.0178	-0.0331	8.79	0.847	-1.42	4.76	0.00715
SHARED	PRKAB2	protein kinase, AMP-activated, beta 2 non-catalytic subunit	0.976	9.82	0.00238	0.0139	10.3	0.937	-0.694	9.09	0.0152
SHARED	PRKAR2A	protein kinase, cAMP-dependent, regulatory, type II, alpha	0.779	11.5	0.0362	-0.0761	13.5	0.461	-1.11	8.19	0.00552
SHARED	PRKCE	protein kinase C, epsilon	-1.06	1.81	0.0185	-0.0559	1.72	0.8	0.733	1.11	0.0196
SHARED	PRPS1	phosphoribosyl pyrophosphate synthetase 1	1.97	76.2	0.000134	0.0779	90.1	0.497	-1.99	50.5	0.00207
SHARED	PRPS1L1		1.91	2.2	0.000433	0.0532	2.92	0.917	-2.3	1.48	0.00237
SHARED	PRRT2	proline-rich transmembrane protein 2	-1.21	1.17	0.0368	0.0747	0.964	0.878	1.42	1.19	0.00457
SHARED	PSMB8	proteasome (prosome, macropain) subunit, beta type, 8	-0.84	24	0.0416	-0.103	17	0.62	0.731	30.8	0.0495
SHARED	PSMD2	proteasome (prosome, macropain) 26S subunit, non-ATPase, 2	0.946	68.5	0.00553	-0.0859	81.3	0.31	-0.901	46.5	0.0153
SHARED	PTGS2	prostaglandin-endoperoxide synthase 2 (prostaglandin G/H synthase and cyclooxygenase)	2.48	33.2	0.0138	-0.326	37.4	0.0535	-3.37	14.9	0.00409
SHARED	PTHLH	parathyroid hormone-like hormone	1.98	3.6	0.0391	-0.217	2.9	0.296	-3.46	2.53	0.00309
SHARED	PTPDC1	protein tyrosine phosphatase domain containing 1	1.16	1.87	0.0034	-0.0797	2.31	0.68	-1.04	1.7	0.00636
SHARED	PTPLAD2	protein tyrosine phosphatase-like A domain containing 2	-1.01	4.81	0.0079	-0.0307	3.63	0.888	0.681	5.18	0.0404
SHARED	PUS7	pseudouridylate synthase 7 (putative)	0.749	4.46	0.0463	-0.0453	4.26	0.852	-1.23	3.43	0.00749
SHARED	PVR	poliovirus receptor	1.87	14.3	0.00735	-0.0132	15.9	0.95	-1.61	11.2	0.00899
SHARED	PXDC1	PX domain containing 1	1.61	54.4	0.00311	0.0452	92.2	0.745	-1.79	38.9	0.00357
SHARED	PYCARD	PYD and CARD domain containing	-0.998	12.1	0.0268	0.0481	9.44	0.895	0.765	16.3	0.0156
SHARED	RAB3B	RAB3B, member RAS oncogene family	1.1	13.7	0.045	-0.173	12.2	0.104	-1.19	9.96	0.00308
SHARED	RAB3IL1	RAB3A interacting protein (rabin3)-like 1	-1.24	1.81	0.0121	0.0352	1.87	0.936	1.14	1.88	0.00405
SHARED	RAB40B	RAB40B, member RAS oncogene family	-0.698	2.76	0.0295	0.0338	2.71	0.918	0.645	3.74	0.0303
SHARED	RAB7B	RAB7B, member RAS oncogene family	-2.15	1.52	0.000272	0.156	1.27	0.599	2.32	2.57	0.00308
SHARED	RAB8B	RAB8B, member RAS oncogene family	-0.821	7.29	0.00553	-0.0362	5.44	0.88	0.823	9.35	0.0209
SHARED	RAC2	ras-related C3 botulinum toxin substrate 2 (rho family, small GTP binding protein Rac2)	-1.63	12.3	0.00553	0.0156	11.4	0.952	0.721	9.96	0.0137
SHARED	RAI14	retinoic acid induced 14	1.57	74.5	0.005	-0.0533	75.8	0.587	-1.21	63	0.0102
SHARED	RAP2B	RAP2B, member of RAS oncogene family	-1.38	3.07	0.00626	0.118	3.28	0.296	0.767	3.04	0.00611
SHARED	RASL11B	RAS-like, family 11, member B	3.79	6.72	0.0131	0.173	7.23	0.328	-2.84	4.85	0.00207
SHARED	RBM24	RNA binding motif protein 24	1.68	3.86	0.00346	0.0162	4.97	0.952	-2.17	2.01	0.0013
SHARED	RC3H2	ring finger and CCCH-type domains 2	0.606	10.5	0.0373	-0.00303	12.4	0.993	-0.707	8.69	0.00876
SHARED	RCL1	RNA terminal phosphate cyclase-like 1	0.823	4.98	0.0128	-0.116	5.57	0.597	-0.968	4.3	0.0101
SHARED	REC114	REC114 meiotic recombination protein	0.604	20.7	0.0413	-0.0699	19.3	0.868	-0.76	19	0.0179
SHARED	RELL1	RELT-like 1	1.46	2.53	0.00117	-0.093	3.33	0.638	-0.92	2.17	0.00584
SHARED	REV3L	REV3-like, polymerase (DNA directed), zeta, catalytic subunit	-0.842	3.09	0.0324	0.026	2.96	0.917	0.743	2.63	0.0468
SHARED	RFTN1	raftlin, lipid raft linker 1	0.673	24.8	0.0423	-0.0162	30.8	0.918	-0.972	24.4	0.0169
SHARED	RFTN2	raftlin family member 2	-1.21	1.35	0.0496	0.0475	1.55	0.909	1.08	1.64	0.00751
SHARED	RHOB	ras homolog family member B	1.48	117	0.00613	0.0479	139	0.723	-2.01	74.5	0.00385
SHARED	RILP	Rab interacting lysosomal protein	-0.952	3.5	0.0463	0.0118	1.55	0.987	0.879	3.83	0.024
SHARED	RIN1	Ras and Rab interactor 1	-1.45	4.72	0.000178	0.0316	4.53	0.916	1.15	5.69	0.00324
SHARED	RNF126	ring finger protein 126	0.883	26.7	0.0146	0.014	30	0.949	-1.12	17.6	0.00338
SHARED	RNF150	ring finger protein 150	1.26	2.96	0.0284	0.0118	3.79	0.974	-1.03	2.12	0.0116
SHARED	RNF24	ring finger protein 24	-0.839	5.13	0.0211	0.00375	5.04	0.991	0.835	5.39	0.00886
SHARED	RRP9	ribosomal RNA processing 9, small subunit (SSU) processome component, homolog (yeast)	0.794	12.5	0.00524	-0.0505	13.4	0.811	-0.883	9.71	0.00688
SHARED	RUNX1T1	runt-related transcription factor 1; translocated to, 1 (cyclin D-related)	-1.63	1.11	0.0381	0.0466	1.08	0.857	1.86	1.2	0.00404
SHARED	RUSC2	RUN and SH3 domain containing 2	1.59	28.2	0.000134	0.129	39	0.145	-1.65	20.1	0.00663
SHARED	SAV1	salvador family WW domain containing protein 1	-1.34	6.51	0.000886	-0.0137	6.11	0.966	1.1	7.97	0.00733
SHARED	SCN8A	sodium channel, voltage gated, type VIII, alpha subunit	-0.739	1.22	0.0465	0.0169	1.25	0.961	0.699	1.29	0.0228
SHARED	SDC1	syndecan 1	1.31	23.5	0.026	0.0275	57.1	0.856	-1.45	22.6	0.0037
SHARED	SDE2	SDE2 telomere maintenance homolog (S. pombe)	0.784	7.13	0.000313	-0.109	7.21	0.467	-0.95	5.89	0.00328
SHARED	SDPR	serum deprivation response	-2.29	1.18	0.0251	-0.138	0.465	0.72	1.92	2	0.00733
SHARED	SEC14L2	SEC14-like 2 (S. cerevisiae)	1.12	8.48	0.013	-0.0175	8.29	0.93	-1.24	7.12	0.00331
SHARED	SEC23B	Sec23 homolog B (S. cerevisiae)	0.695	12.5	0.0107	-0.0713	17	0.518	-0.677	11.9	0.0161
SHARED	SERPINE1	serpin peptidase inhibitor, clade E (nexin, plasminogen activator inhibitor type 1), member 1	1.74	2670	0.0111	-0.0583	2920	0.591	-3.59	1500	0.00308
SHARED	SESN3	sestrin 3	-1.19	1.78	0.0449	0.0818	1.77	0.771	1.21	2.22	0.01
SHARED	SH3PXD2A	SH3 and PX domains 2A	1.33	86.8	0.00622	0.0231	103	0.848	-1.88	70.7	0.00634
SHARED	SIGIRR	single immunoglobulin and toll-interleukin 1 receptor (TIR) domain	-0.747	3.71	0.0391	0.128	3.7	0.51	0.666	4.19	0.0183
SHARED	SIX5	SIX homeobox 5	-0.998	5.07	0.00394	0.15	5.49	0.414	0.952	4.4	0.00473
SHARED	SKIL	SKI-like proto-oncogene	1.53	17	0.00803	-0.0984	18.5	0.558	-2.47	10.7	0.00382
SHARED	SLC16A2	solute carrier family 16, member 2 (thyroid hormone transporter)	0.976	21.7	0.0424	-0.114	24.9	0.249	-1.35	15.9	0.00421
SHARED	SLC19A2	solute carrier family 19 (thiamine transporter), member 2	3.04	11.5	5.5e-05	-0.132	12.9	0.296	-3.47	4.5	0.00207
SHARED	SLC25A25	solute carrier family 25 (mitochondrial carrier; phosphate carrier), member 25	1.24	3.59	0.00147	-0.0452	4.22	0.791	-0.755	2.48	0.0344
SHARED	SLC25A32	solute carrier family 25 (mitochondrial folate carrier), member 32	0.848	15.3	0.00228	-0.0171	16.4	0.938	-1.27	12.1	0.00254
SHARED	SLC25A37	solute carrier family 25 (mitochondrial iron transporter), member 37	-1.07	4.17	0.027	0.014	2.62	0.961	0.844	4.23	0.011
SHARED	SLC26A2	solute carrier family 26 (anion exchanger), member 2	0.751	4.01	0.0207	-0.064	5.64	0.665	-0.798	3.15	0.0162
SHARED	SLC30A1	solute carrier family 30 (zinc transporter), member 1	0.627	14.4	0.0258	-0.0855	16.4	0.493	-0.698	12.3	0.0104
SHARED	SLC35D1	solute carrier family 35 (UDP-GlcA/UDP-GalNAc transporter), member D1	1.43	7.79	0.00892	-0.0547	8.55	0.665	-1.63	4.25	0.00586
SHARED	SLC35E1	solute carrier family 35, member E1	0.677	17.6	0.0432	-0.0142	23.7	0.935	-0.869	13.4	0.00731
SHARED	SLC35G1	solute carrier family 35, member G1	0.826	1.51	0.0437	-0.196	1.42	0.553	-0.88	1.26	0.00828
SHARED	SLC38A5	solute carrier family 38, member 5	4.89	13.5	0.00329	-0.0968	14.5	0.454	-1.45	11	0.00404
SHARED	SLC41A1	solute carrier family 41 (magnesium transporter), member 1	1.06	11.2	0.03	-0.0335	13.2	0.812	-1.17	7.62	0.014
SHARED	SLC43A3	solute carrier family 43, member 3	-1.06	5.51	0.0041	0.0362	3.83	0.896	0.614	6.78	0.0316
SHARED	SLC4A2	solute carrier family 4 (anion exchanger), member 2	0.933	27.7	0.0261	0.0436	37.5	0.721	-1	21.3	0.00678
SHARED	SMAD3	SMAD family member 3	-1.68	8.64	0.0485	0.0428	5.75	0.788	1.77	13.6	0.00207
SHARED	SMAD7	SMAD family member 7	1.92	28	0.00217	-0.0605	39.1	0.571	-2.64	9.8	0.00207
SHARED	SMIM13	small integral membrane protein 13	0.84	6.69	0.0168	-0.121	7.11	0.395	-1.19	4.94	0.00338
SHARED	SMTN	smoothelin	0.854	33.5	0.0432	0.014	33.9	0.947	-1.7	30.8	0.00464
SHARED	SMURF1	SMAD specific E3 ubiquitin protein ligase 1	0.967	12.3	0.0283	-0.0354	13	0.797	-1.22	8.33	0.00764
SHARED	SNAI1	snail family zinc finger 1	2.31	27.3	0.00131	0.0864	31.2	0.601	-2.95	11.7	0.00207
SHARED	SNX21	sorting nexin family member 21	-1.34	7.32	0.000641	0.0726	6.85	0.647	1.02	9.66	0.00324
SHARED	SOCS6	suppressor of cytokine signaling 6	0.611	8.95	0.0461	0.0306	9.41	0.838	-0.613	6.92	0.0136
SHARED	SOX12	SRY (sex determining region Y)-box 12	-1.16	4.79	0.0199	0.114	4.54	0.659	0.904	6.08	0.0136
SHARED	SPHK1	sphingosine kinase 1	1.53	76.9	0.0178	-0.0644	79.9	0.605	-3.57	44.8	0.00398
SHARED	SPOCD1	SPOC domain containing 1	1.89	10.1	0.0186	0.0116	9.74	0.967	-0.83	15.8	0.0161
SHARED	SRF	serum response factor (c-fos serum response element-binding transcription factor)	1.45	29.3	0.00575	0.00346	33.3	0.991	-2	18.3	0.00308
SHARED	SRM	spermidine synthase	0.627	103	0.00708	-0.0224	108	0.877	-0.729	96.2	0.0243
SHARED	SSBP2	single-stranded DNA binding protein 2	-1.12	2.67	0.0236	0.0461	2.16	0.866	1.17	4.5	0.00952
SHARED	ST3GAL5	ST3 beta-galactoside alpha-2,3-sialyltransferase 5	-1.11	1.32	0.0121	-0.00552	1.1	0.995	0.843	2.15	0.0055
SHARED	STAM	signal transducing adaptor molecule (SH3 domain and ITAM motif) 1	0.63	8.13	0.00613	0.00385	9.25	0.991	-0.729	6.55	0.00952
SHARED	STARD5	StAR-related lipid transfer (START) domain containing 5	-0.916	1.7	0.0308	-0.174	1.28	0.719	1.4	3.78	0.00636
SHARED	STK38L	serine/threonine kinase 38 like	2.13	21.8	0.000313	-0.0924	20.8	0.557	-2.85	19.3	0.00207
SHARED	SYNE1	spectrin repeat containing, nuclear envelope 1	0.867	4.41	0.0145	0.0256	6.27	0.893	-1.82	3.61	0.00777
SHARED	SYNGAP1	synaptic Ras GTPase activating protein 1	-0.861	2.81	0.0139	0.0513	2.36	0.819	0.722	3.18	0.0112
SHARED	TAF13	TAF13 RNA polymerase II, TATA box binding protein (TBP)-associated factor, 18kDa	0.825	45	0.0346	-0.0501	44.3	0.769	-0.966	59.8	0.00963
SHARED	TBC1D10A	TBC1 domain family, member 10A	0.631	13	0.0206	0.051	14.4	0.824	-0.724	12.4	0.00874
SHARED	TBKBP1	TBK1 binding protein 1	-0.819	1.89	0.0127	0.0973	1.85	0.681	0.677	2.01	0.0233
SHARED	TDG	thymine-DNA glycosylase	0.97	5.27	0.029	0.00978	5.35	0.98	-0.942	7.01	0.00956
SHARED	TEF	thyrotrophic embryonic factor	-2.05	1.09	0.00242	0.122	0.934	0.706	1.58	2.02	0.0101
SHARED	TEN1	TEN1 CST complex subunit	0.916	27.3	0.00592	-0.0649	28.2	0.673	-0.752	25.5	0.0203
SHARED	TGFBI	transforming growth factor, beta-induced, 68kDa	1.08	3500	0.0496	0.087	6090	0.296	-1.08	2990	0.0187
SHARED	TGFBR3	transforming growth factor, beta receptor III	-2.01	1.94	0.00801	-0.0707	1.44	0.797	1.85	1.72	0.00237
SHARED	TMCO4	transmembrane and coiled-coil domains 4	-0.604	2.65	0.0366	0.0999	2.54	0.69	0.852	3.5	0.00847
SHARED	TMEFF1	transmembrane protein with EGF-like and two follistatin-like domains 1	0.993	6.39	0.0106	-0.105	8.87	0.592	-1.3	4.64	0.00443
SHARED	TMEM140	transmembrane protein 140	-0.866	8.42	0.0146	0.0232	7.97	0.925	0.898	8.8	0.00868
SHARED	TMEM171	transmembrane protein 171	-2.27	2.48	0.000178	0.0944	1.91	0.844	1.18	4.2	0.00803
SHARED	TMEM189	transmembrane protein 189	1.01	44.1	0.0155	0.0251	48.6	0.872	-1.52	39.6	0.00207
SHARED	TMEM240	transmembrane protein 240	-1.05	1.12	0.0131	0.331	0.763	0.561	0.589	1.32	0.0423
SHARED	TNC	tenascin C	1.91	511	0.00892	-0.0254	780	0.885	-1.05	322	0.0422
SHARED	TNFRSF12A	tumor necrosis factor receptor superfamily, member 12A	0.851	320	0.0375	-0.051	313	0.72	-1.96	217	0.00324
SHARED	TNFRSF14	tumor necrosis factor receptor superfamily, member 14	-1.28	2.33	0.043	0.21	0.689	0.328	1.06	2.8	0.00368
SHARED	TNFSF10	tumor necrosis factor (ligand) superfamily, member 10	-2.27	2.51	0.0193	-0.082	0.904	0.897	2.46	2.74	0.00494
SHARED	TPM1	tropomyosin 1 (alpha)	1.58	249	0.00237	-0.00424	251	0.984	-1.97	267	0.00457
SHARED	TRANK1	tetratricopeptide repeat and ankyrin repeat containing 1	-1.45	1.66	0.0194	-0.0103	1.48	0.979	1.46	1.79	0.00324
SHARED	TREX1	three prime repair exonuclease 1	-1.51	3.66	0.00208	-0.0506	2.77	0.886	1.25	5.59	0.00328
SHARED	TRIM69	tripartite motif containing 69	-1.41	2.91	0.00981	0.0284	2.27	0.949	1.15	4.37	0.0114
SHARED	TSPAN13	tetraspanin 13	4.31	41.1	3.33e-08	-0.0523	41.5	0.769	-3.22	23.3	0.0013
SHARED	TSPAN2	tetraspanin 2	3.2	48.9	0.000224	-0.0144	51.9	0.932	-2.83	14	0.00308
SHARED	TUBB6	tubulin, beta 6 class V	0.964	167	0.002	0.0102	175	0.95	-0.907	164	0.00734
SHARED	TUFT1	tuftelin 1	2.02	7.45	0.000178	0.054	8.32	0.724	-2.03	3.77	0.00504
SHARED	TWIST1	twist family bHLH transcription factor 1	-1.55	5.43	0.0472	0.0938	5.3	0.656	1.12	3.14	0.00367
SHARED	UBE2S	ubiquitin-conjugating enzyme E2S	0.628	12.8	0.0386	0.253	12.8	0.0985	-0.798	15.6	0.0231
SHARED	UCK2	uridine-cytidine kinase 2	1.19	22.2	0.00474	-0.101	24	0.347	-1.89	16.3	0.0037
SHARED	URB1	URB1 ribosome biogenesis 1 homolog (S. cerevisiae)	1.01	7.06	0.0209	-0.0245	9.53	0.882	-1.28	4.2	0.00663
SHARED	VEGFA	vascular endothelial growth factor A	2.47	55.9	0.002	-0.222	66.6	0.0967	-2.23	26.1	0.0137
SHARED	VPS37D	vacuolar protein sorting 37 homolog D (S. cerevisiae)	-1.16	1.01	0.037	-0.0628	0.535	0.949	1.12	1.34	0.00874
SHARED	WDR19	WD repeat domain 19	-0.77	2.48	0.00563	-0.0299	2.75	0.908	0.689	2.43	0.0151
SHARED	WDR44	WD repeat domain 44	0.684	7.15	0.00354	0.0415	8.26	0.819	-0.682	6.41	0.0113
SHARED	WDR47	WD repeat domain 47	0.805	6.06	0.0169	0.00366	7.15	0.991	-0.96	5.46	0.00867
SHARED	WWC2	WW and C2 domain containing 2	1.21	14.5	0.00983	-0.0327	17.6	0.827	-1.82	9.32	0.00319
SHARED	XYLT1	xylosyltransferase I	2.53	51.9	0.00037	-0.0904	62.2	0.306	-3.04	28.6	0.00338
SHARED	YKT6	YKT6 v-SNARE homolog (S. cerevisiae)	0.613	66.6	0.0224	-0.063	79.8	0.572	-0.768	54	0.0135
SHARED	YPEL3	yippee-like 3 (Drosophila)	-1.01	12.3	0.00217	0.131	11.5	0.433	0.781	12.8	0.015
SHARED	YRDC	yrdC N(6)-threonylcarbamoyltransferase domain containing	1.09	16.6	0.00607	-0.0243	16.6	0.916	-1.5	13.9	0.00343
SHARED	ZFP36L2	ZFP36 ring finger protein-like 2	-1.2	19.3	0.000224	0.0436	19.3	0.819	1.21	18.6	0.00533
SHARED	ZNF26	zinc finger protein 26	0.633	1.51	0.0126	-0.0788	1.51	0.788	-0.828	1.19	0.00611
SHARED	ZNF28	zinc finger protein 28	0.614	2.28	0.0483	0.0276	2.6	0.911	-0.897	1.8	0.0078
SHARED	ZNF395	zinc finger protein 395	-1.94	1.45	0.000313	-0.063	1.34	0.856	1.65	2.18	0.00508
SHARED	ZNF446	zinc finger protein 446	-0.685	2	0.0362	0.114	2.13	0.7	0.838	2.37	0.00749
SHARED	ZNF468	zinc finger protein 468	1.21	3.51	0.0353	-0.139	3.5	0.323	-1.07	3.93	0.00514
SHARED	ZNF581	zinc finger protein 581	-0.803	7.79	0.0373	0.0733	6.88	0.765	0.669	10.9	0.0143
SHARED	ZNF93	zinc finger protein 93	1.39	1.24	0.0117	-0.151	1.84	0.549	-0.97	1.14	0.0165
SHARED	ZSWIM4	zinc finger, SWIM-type containing 4	1.96	7.92	0.0108	-0.00874	10.1	0.972	-2.09	4.21	0.00207
SSc vs. NF ONLY	AAED1	AhpC/TSA antioxidant enzyme domain containing 1	-0.75	6.73	0.048	0.00482	4.6	0.993	0.573	8.84	0.063
SSc vs. NF ONLY	ABHD14A	abhydrolase domain containing 14A	-0.746	9.11	0.0302	-0.0287	8.48	0.928	0.255	8.45	0.274
SSc vs. NF ONLY	ADAM23	ADAM metallopeptidase domain 23	1.42	1.84	0.0222	0.0456	1.95	0.846	-0.0455	3.01	0.877
SSc vs. NF ONLY	ADD3	adducin 3 (gamma)	-1.29	20.3	0.000326	-0.0273	14.8	0.849	0.459	20.9	0.0566
SSc vs. NF ONLY	AGTRAP	angiotensin II receptor-associated protein	0.812	32.4	0.0306	0.037	34	0.823	-0.199	33.2	0.305
SSc vs. NF ONLY	AKAP8L	A kinase (PRKA) anchor protein 8-like	-0.715	6.35	0.017	0.022	5.64	0.933	0.409	7.83	0.0552
SSc vs. NF ONLY	ANKRD13B	ankyrin repeat domain 13B	-0.96	2.69	0.00626	0.0582	2.33	0.859	0.363	2.68	0.223
SSc vs. NF ONLY	AP1S2	adaptor-related protein complex 1, sigma 2 subunit	0.878	4.76	0.0274	-0.0107	4.98	0.978	0.172	7.71	0.578
SSc vs. NF ONLY	AP5Z1	adaptor-related protein complex 5, zeta 1 subunit	0.629	7.8	0.0286	0.0343	8.26	0.86	-0.426	7.63	0.105
SSc vs. NF ONLY	ARSA	arylsulfatase A	-0.769	14.2	0.0435	0.0149	11.3	0.947	-0.0354	13.1	0.861
SSc vs. NF ONLY	ASB1	ankyrin repeat and SOCS box containing 1	0.646	6.59	0.0378	-0.0093	7.56	0.962	-0.153	5.76	0.426
SSc vs. NF ONLY	ATP6V1G2		-1.17	1.31	0.0276	-0.052	1.06	0.939	0.535	1.47	0.0936
SSc vs. NF ONLY	BASP1	brain abundant, membrane attached signal protein 1	0.973	117	0.00354	0.00429	121	0.987	-0.521	104	0.0365
SSc vs. NF ONLY	BCL2L1	BCL2-like 1	-0.811	15.6	0.02	-0.0325	10.4	0.834	0.304	15.6	0.106
SSc vs. NF ONLY	BMPER	BMP binding endothelial regulator	-1.78	5.85	0.0359	-0.137	5.1	0.245	0.309	3.12	0.203
SSc vs. NF ONLY	BMPR1B	bone morphogenetic protein receptor, type IB	2.3	1.04	0.0148	-0.287	1.61	0.105	-1.38	0.609	0.004
SSc vs. NF ONLY	BST1	bone marrow stromal cell antigen 1	-0.966	5.19	0.00622	-0.0174	4.02	0.95	0.214	5.82	0.389
SSc vs. NF ONLY	BTD	biotinidase	-0.654	3.79	0.0323	-0.0836	3.74	0.594	0.197	3.69	0.348
SSc vs. NF ONLY	BTN2A1	butyrophilin, subfamily 2, member A1	0.72	10.6	0.0216	-0.00426	10.2	0.99	-0.583	10.2	0.0129
SSc vs. NF ONLY	BTN3A2	butyrophilin, subfamily 3, member A2	-1.41	3.67	0.000283	0.0273	3.3	0.918	0.545	3.63	0.0223
SSc vs. NF ONLY	C10orf88	chromosome 10 open reading frame 88	0.612	3.46	0.00593	-0.00781	3.42	0.986	-0.515	3.39	0.0241
SSc vs. NF ONLY	C1orf21	chromosome 1 open reading frame 21	-0.838	2.13	0.00642	0.00631	1.97	0.986	0.391	2.26	0.153
SSc vs. NF ONLY	CAB39L	calcium binding protein 39-like	-0.72	3.79	0.0404	-0.117	2.73	0.558	0.149	4.56	0.446
SSc vs. NF ONLY	CAMK4	calcium/calmodulin-dependent protein kinase IV	1.66	1.5	0.0209	-0.0233	1.5	0.965	-0.542	1.41	0.0552
SSc vs. NF ONLY	CBR3	carbonyl reductase 3	-1.32	10.3	0.00422	-0.00354	7.45	0.995	0.976	14.5	0.0626
SSc vs. NF ONLY	CCDC28B	coiled-coil domain containing 28B	-0.673	2.6	0.0471	0.0538	2.37	0.885	0.656	3.51	0.0572
SSc vs. NF ONLY	CD97	CD97 molecule	-0.856	15.6	0.0362	-0.00265	13.9	0.995	-0.00968	13.5	0.968
SSc vs. NF ONLY	CDK5RAP2	CDK5 regulatory subunit associated protein 2	-1.07	5.3	5.5e-05	0.0614	5.16	0.642	0.492	5.78	0.0274
SSc vs. NF ONLY	CEP78	centrosomal protein 78kDa	0.736	2.64	0.0199	0.00166	3.01	0.998	-0.505	2.66	0.0485
SSc vs. NF ONLY	CFL1	cofilin 1 (non-muscle)	0.606	615	0.0154	0.0457	640	0.716	-0.292	621	0.217
SSc vs. NF ONLY	COTL1	coactosin-like F-actin binding protein 1	0.821	127	0.035	0.0369	127	0.781	-0.455	122	0.108
SSc vs. NF ONLY	CPE	carboxypeptidase E	1.63	24.2	0.00544	-0.0973	26.2	0.429	-0.228	40.3	0.239
SSc vs. NF ONLY	CRMP1	collapsin response mediator protein 1	-0.788	1.74	0.0421	0.00777	1.72	0.986	0.459	1.34	0.142
SSc vs. NF ONLY	CSTF1	cleavage stimulation factor, 3' pre-RNA, subunit 1, 50kDa	-1.02	7.26	0.00056	-0.0237	6.47	0.921	0.185	7.48	0.291
SSc vs. NF ONLY	CTDSPL	CTD (carboxy-terminal domain, RNA polymerase II, polypeptide A) small phosphatase-like	-0.793	5.8	0.00583	0.0621	5.32	0.68	0.306	5.84	0.122
SSc vs. NF ONLY	CTNNAL1	catenin (cadherin-associated protein), alpha-like 1	-0.596	28.6	0.0492	-0.0424	23.7	0.803	0.277	35.8	0.368
SSc vs. NF ONLY	CYP4V2	cytochrome P450, family 4, subfamily V, polypeptide 2	-0.616	2.72	0.0354	-0.0181	2.68	0.946	0.25	2.4	0.246
SSc vs. NF ONLY	DDB2	damage-specific DNA binding protein 2, 48kDa	-0.898	12.1	0.0488	-0.0178	6.38	0.95	0.488	14	0.0287
SSc vs. NF ONLY	DENND6B	DENN/MADD domain containing 6B	-0.698	2.62	0.0379	0.0893	2.28	0.781	0.488	2.42	0.0377
SSc vs. NF ONLY	DIO2	deiodinase, iodothyronine, type II	2.41	2.89	0.00127	0.197	3.82	0.395	-0.204	4.08	0.526
SSc vs. NF ONLY	DIRC2	disrupted in renal carcinoma 2	0.834	3.55	0.0416	0.0318	5.29	0.888	-0.364	3.16	0.143
SSc vs. NF ONLY	DLX2	distal-less homeobox 2	3.26	1.96	0.0199	0.152	3.14	0.487	-3.29	0.882	0.00352
SSc vs. NF ONLY	EDA2R	ectodysplasin A2 receptor	-0.781	4.69	0.00892	0.00644	4.31	0.989	0.534	6.01	0.0285
SSc vs. NF ONLY	EFEMP1	EGF containing fibulin-like extracellular matrix protein 1	-1.57	85.6	0.00428	0.0766	74.2	0.493	0.192	88.6	0.329
SSc vs. NF ONLY	EFR3B	EFR3 homolog B (S. cerevisiae)	2.72	1.69	0.00238	-0.163	2.81	0.215	-3.62	0.69	0.00352
SSc vs. NF ONLY	EHD3	EH-domain containing 3	-1.21	8.81	0.00473	-0.129	8.89	0.384	0.122	8.3	0.65
SSc vs. NF ONLY	ELF1	E74-like factor 1 (ets domain transcription factor)	-0.654	10	0.0474	-0.0742	9.44	0.586	0.0592	9.92	0.752
SSc vs. NF ONLY	ELL2	elongation factor, RNA polymerase II, 2	0.977	19.1	0.00471	0.0122	20.7	0.952	-0.44	19.2	0.123
SSc vs. NF ONLY	ENOX1	ecto-NOX disulfide-thiol exchanger 1	-1.48	1.29	0.00251	-0.0702	1.1	0.841	0.669	1.24	0.0758
SSc vs. NF ONLY	ERAP2	endoplasmic reticulum aminopeptidase 2	2.31	6.07	0.0444	-0.126	5.11	0.346	0.232	8.13	0.325
SSc vs. NF ONLY	EVA1B	eva-1 homolog B (C. elegans)	-0.643	44.3	0.0357	0.0226	30.6	0.921	0.329	46.1	0.15
SSc vs. NF ONLY	FAM174A	family with sequence similarity 174, member A	0.851	6.85	0.00355	-0.0574	6.85	0.801	-0.433	7.48	0.0628
SSc vs. NF ONLY	FAM177A1	family with sequence similarity 177, member A1	0.587	9.8	0.0276	0.017	9.95	0.948	-0.392	11.5	0.063
SSc vs. NF ONLY	FNBP1	formin binding protein 1	-0.724	5.19	0.0394	0.0751	5.15	0.618	0.419	4.59	0.129
SSc vs. NF ONLY	FOXO1	forkhead box O1	1.55	1.67	0.0233	0.0326	2.4	0.914	-2.25	0.737	0.00933
SSc vs. NF ONLY	FYN	FYN proto-oncogene, Src family tyrosine kinase	-1.68	8.51	0.00399	0.00433	8.5	0.99	0.511	6.55	0.0449
SSc vs. NF ONLY	GAL3ST4	galactose-3-O-sulfotransferase 4	-0.735	6.83	0.0193	0.0335	5.35	0.888	0.298	6.89	0.306
SSc vs. NF ONLY	GALNT4	polypeptide N-acetylgalactosaminyltransferase 4	-0.92	1.87	0.0187	-0.0822	1.68	0.73	0.389	1.73	0.131
SSc vs. NF ONLY	GATS	GATS, stromal antigen 3 opposite strand	-0.644	1.4	0.0233	-0.0523	1.38	0.836	0.515	1.51	0.0426
SSc vs. NF ONLY	GK5	glycerol kinase 5 (putative)	0.769	1.25	0.0178	0.0449	1.48	0.847	-0.0852	1.26	0.672
SSc vs. NF ONLY	GLI3	GLI family zinc finger 3	-1.24	2.64	0.0279	0.0768	3.73	0.589	0.687	1.89	0.0561
SSc vs. NF ONLY	GLUL	glutamate-ammonia ligase	-0.659	19.5	0.0199	-0.0405	19.1	0.724	0.257	17.8	0.263
SSc vs. NF ONLY	GMIP	GEM interacting protein	0.864	4.83	0.0228	0.0286	5.64	0.907	-0.67	4.08	0.052
SSc vs. NF ONLY	GPD2	glycerol-3-phosphate dehydrogenase 2 (mitochondrial)	-1.01	4.14	0.00346	-0.0732	3.99	0.645	0.432	4.01	0.051
SSc vs. NF ONLY	GRK4	G protein-coupled receptor kinase 4	1.12	1.13	0.00201	-0.0858	1.12	0.841	-0.441	1.13	0.0977
SSc vs. NF ONLY	GYPC	glycophorin C (Gerbich blood group)	-1.04	13.8	0.00287	-0.0989	9.84	0.433	0.411	14.7	0.0568
SSc vs. NF ONLY	HCFC1R1	host cell factor C1 regulator 1 (XPO1 dependent)	-0.861	45.5	0.0178	0.0223	39.8	0.933	0.521	50.7	0.0801
SSc vs. NF ONLY	HEXDC	hexosaminidase (glycosyl hydrolase family 20, catalytic domain) containing	-0.613	2.46	0.039	0.0779	2.5	0.74	0.495	2.52	0.0641
SSc vs. NF ONLY	HIBADH	3-hydroxyisobutyrate dehydrogenase	-0.659	9.21	0.0121	-0.0267	7.48	0.887	0.314	10.5	0.166
SSc vs. NF ONLY	HLA-F	major histocompatibility complex, class I, F	-1.63	2.82	0.0212	-0.0253	2.12	0.957	0.431	2.22	0.103
SSc vs. NF ONLY	HMCES	5-hydroxymethylcytosine (hmC) binding, ES cell-specific	-0.816	3.08	0.0391	0.000795	2.8	0.999	0.467	3.97	0.0458
SSc vs. NF ONLY	HPCAL1	hippocalcin-like 1	-0.69	5.48	0.0279	-0.0186	4.81	0.937	-0.0479	4.7	0.845
SSc vs. NF ONLY	HRCT1	histidine rich carboxyl terminus 1	1.78	2.71	0.0145	0.161	3.92	0.655	-0.445	2.27	0.195
SSc vs. NF ONLY	IGF1	insulin-like growth factor 1 (somatomedin C)	4.27	1.44	0.0136	0.0044	4.95	0.992	-2.29	0.558	0.00331
SSc vs. NF ONLY	ING1	inhibitor of growth family, member 1	-0.628	1.89	0.0212	0.123	1.81	0.628	0.556	2.15	0.0422
SSc vs. NF ONLY	INPP1	inositol polyphosphate-1-phosphatase	-0.778	8.15	0.0131	0.0748	5.19	0.658	0.574	9.07	0.0419
SSc vs. NF ONLY	IRF3	interferon regulatory factor 3	-0.635	7.84	0.0115	0.0121	6.68	0.964	0.29	7.87	0.149
SSc vs. NF ONLY	JMJD4	jumonji domain containing 4	0.674	8.27	0.00336	0.0305	9.31	0.881	-0.554	6.67	0.0167
SSc vs. NF ONLY	KAZALD1	Kazal-type serine peptidase inhibitor domain 1	-1.03	2.5	0.0227	0.0523	2.64	0.801	0.324	1.86	0.173
SSc vs. NF ONLY	KCNJ8	potassium inwardly-rectifying channel, subfamily J, member 8	1.46	2.34	0.0092	-0.0414	2.79	0.888	0.247	3.17	0.516
SSc vs. NF ONLY	KCTD10	potassium channel tetramerization domain containing 10	0.731	18.7	0.00981	0.0411	22.9	0.719	-0.483	17.3	0.0386
SSc vs. NF ONLY	KDM3A	lysine (K)-specific demethylase 3A	0.738	5.48	0.0114	-0.0194	5.84	0.923	-0.568	4.57	0.0172
SSc vs. NF ONLY	KIAA1522	KIAA1522	-1.27	3.89	0.017	-0.0128	3.53	0.954	-0.0225	3.36	0.931
SSc vs. NF ONLY	KIAA1551	KIAA1551	-0.72	1.54	0.0345	-0.00734	1.55	0.99	0.257	1.23	0.281
SSc vs. NF ONLY	LNX1	ligand of numb-protein X 1, E3 ubiquitin protein ligase	-2.03	1.12	0.00131	-0.0915	1.05	0.779	0.701	0.763	0.0397
SSc vs. NF ONLY	LOC101929304	uncharacterized LOC101929304	-0.843	5.62	0.00868	0.0427	5.69	0.869	0.344	4.3	0.252
SSc vs. NF ONLY	LOC102723683	uncharacterized LOC102723683	1.47	1.33	0.0234	0.0345	2.09	0.955	-0.758	0.851	0.0811
SSc vs. NF ONLY	LOC102724705	small nuclear ribonucleoprotein-associated protein B'-like	-1.81	6.7	0.00212	0.108	6.47	0.792	0.401	5.55	0.195
SSc vs. NF ONLY	LPCAT4	lysophosphatidylcholine acyltransferase 4	-1.13	4.98	0.00197	-0.0345	4.36	0.898	0.516	5.87	0.0363
SSc vs. NF ONLY	LTC4S	leukotriene C4 synthase	-1.17	1.19	0.0194	0.336	1.05	0.631	-0.12	0.978	0.744
SSc vs. NF ONLY	MAP3K10	mitogen-activated protein kinase kinase kinase 10	0.714	3.01	0.011	0.095	3.91	0.646	-0.564	2.8	0.0549
SSc vs. NF ONLY	MPV17L2	MPV17 mitochondrial membrane protein-like 2	0.649	9.19	0.00649	-0.0131	11.2	0.97	-0.211	9.35	0.329
SSc vs. NF ONLY	MSTO1	misato 1, mitochondrial distribution and morphology regulator	0.781	1.97	0.0287	-0.0564	2.63	0.819	-0.564	1.76	0.0484
SSc vs. NF ONLY	MTMR11	myotubularin related protein 11	-0.725	6.32	0.026	0.014	4.68	0.964	0.535	6.29	0.0247
SSc vs. NF ONLY	MYL9	myosin, light chain 9, regulatory	0.968	660	0.0437	0.0659	656	0.572	-0.276	983	0.296
SSc vs. NF ONLY	MYO19	myosin XIX	0.703	5.1	0.0331	-0.0703	5.37	0.699	-0.442	4.11	0.0795
SSc vs. NF ONLY	NAP1L3	nucleosome assembly protein 1-like 3	1.04	4	0.0136	-0.0559	4.67	0.769	-0.578	3.88	0.0463
SSc vs. NF ONLY	NDE1	nudE neurodevelopment protein 1	-0.867	3.26	0.0121	0.069	2.87	0.693	0.136	3.01	0.638
SSc vs. NF ONLY	NID2	nidogen 2 (osteonidogen)	1.58	27.2	0.0462	0.135	35.1	0.137	0.0128	39.5	0.964
SSc vs. NF ONLY	NOTCH1	notch 1	-1.52	1.57	0.00868	0.039	1.53	0.86	0.506	1.05	0.0843
SSc vs. NF ONLY	NRM	nurim (nuclear envelope membrane protein)	-0.898	4.23	0.0114	0.14	4.23	0.557	0.429	4.3	0.0894
SSc vs. NF ONLY	NT5DC2	5'-nucleotidase domain containing 2	1.12	36	0.0318	0.189	48.5	0.0929	-0.307	34.7	0.316
SSc vs. NF ONLY	OLFML1	olfactomedin-like 1	-1.5	3.53	0.0128	0.0222	2.41	0.96	0.508	3.34	0.0745
SSc vs. NF ONLY	PARP4	poly (ADP-ribose) polymerase family, member 4	-0.649	9.39	0.00784	0.0428	7.91	0.769	0.47	10.6	0.0433
SSc vs. NF ONLY	PCGF5	polycomb group ring finger 5	-0.802	6.57	0.00776	-0.0721	5.74	0.788	0.0619	5.63	0.772
SSc vs. NF ONLY	PCNXL2	pecanex-like 2 (Drosophila)	-0.587	2.1	0.0444	-0.0598	2.06	0.795	0.298	2.04	0.268
SSc vs. NF ONLY	PDCD4	programmed cell death 4 (neoplastic transformation inhibitor)	-0.732	8.32	0.0224	0.0639	7.78	0.683	0.466	9.02	0.0448
SSc vs. NF ONLY	PDPR	pyruvate dehydrogenase phosphatase regulatory subunit	-0.797	3.86	0.0312	-0.0057	3.9	0.986	0.149	2.83	0.575
SSc vs. NF ONLY	PELO	pelota homolog (Drosophila)	0.629	15.6	0.0318	0.00411	16.5	0.99	-0.342	16.1	0.105
SSc vs. NF ONLY	PHLDB3	pleckstrin homology-like domain, family B, member 3	-0.832	1.8	0.0209	0.0358	1.63	0.939	0.32	1.96	0.227
SSc vs. NF ONLY	PIK3R1	phosphoinositide-3-kinase, regulatory subunit 1 (alpha)	-0.828	2.51	0.0107	0.0483	2.49	0.802	0.488	2.25	0.212
SSc vs. NF ONLY	PIM1	Pim-1 proto-oncogene, serine/threonine kinase	2.43	14.8	0.0258	0.0333	26.8	0.824	-0.451	12.5	0.196
SSc vs. NF ONLY	PLCD1	phospholipase C, delta 1	-0.993	3.81	0.00649	0.114	3.28	0.537	0.576	4.34	0.0263
SSc vs. NF ONLY	PLCD3	phospholipase C, delta 3	-0.765	13.7	0.0398	0.0631	13.2	0.638	0.322	13.3	0.189
SSc vs. NF ONLY	PLSCR4	phospholipid scramblase 4	-1.14	6.53	0.00245	-0.0691	4.99	0.683	0.128	6.22	0.545
SSc vs. NF ONLY	POC1B-GALNT4	POC1B-GALNT4 readthrough	-0.887	1.87	0.0115	-0.0791	1.74	0.732	0.383	1.94	0.104
SSc vs. NF ONLY	POU2F2	POU class 2 homeobox 2	-1.93	2.27	0.00738	-0.109	0.924	0.603	-0.113	1.47	0.837
SSc vs. NF ONLY	PPM1M	protein phosphatase, Mg2+/Mn2+ dependent, 1M	-0.614	12.3	0.0179	-0.0213	12	0.918	0.233	12.3	0.203
SSc vs. NF ONLY	PSD3	pleckstrin and Sec7 domain containing 3	-0.975	4.25	0.0417	-0.0139	3.98	0.953	0.504	3.53	0.13
SSc vs. NF ONLY	RELT	RELT tumor necrosis factor receptor	2.64	4.84	0.0109	0.0688	6.94	0.719	-3.81	0.833	0.0029
SSc vs. NF ONLY	RGAG4	retrotransposon gag domain containing 4	-1.61	1.94	0.0131	0.0271	1.88	0.931	0.533	1.88	0.05
SSc vs. NF ONLY	RILPL2	Rab interacting lysosomal protein-like 2	-0.789	4.98	0.00131	-0.0688	4.31	0.795	0.464	5.32	0.0568
SSc vs. NF ONLY	RMDN3	regulator of microtubule dynamics 3	0.623	12.5	0.0391	-0.0311	15.1	0.869	-0.584	10	0.0225
SSc vs. NF ONLY	ROR1		-1.97	2.11	0.000747	0.0181	1.93	0.959	0.454	1.96	0.149
SSc vs. NF ONLY	S100A10	S100 calcium binding protein A10	-0.938	311	0.0462	-0.0177	271	0.933	0.673	314	0.0657
SSc vs. NF ONLY	S1PR5	sphingosine-1-phosphate receptor 5	3.42	1.64	0.00237	-0.0807	2.63	0.75	-3.56	0.849	0.00338
SSc vs. NF ONLY	SCN1B	sodium channel, voltage-gated, type I, beta subunit	-1.04	2.17	0.0113	0.132	1.71	0.749	0.584	2.06	0.0538
SSc vs. NF ONLY	SLC16A7	solute carrier family 16 (monocarboxylate transporter), member 7	0.825	2.3	0.037	-0.0971	2.59	0.634	-0.339	1.97	0.18
SSc vs. NF ONLY	SLC27A3	solute carrier family 27 (fatty acid transporter), member 3	-0.951	2.06	0.013	0.00657	1.65	0.993	0.538	2.19	0.108
SSc vs. NF ONLY	SLC38A7	solute carrier family 38, member 7	0.69	6.84	0.0306	0.0152	8.84	0.942	-0.364	5.38	0.118
SSc vs. NF ONLY	SLFN11	schlafen family member 11	-0.755	8.68	0.0417	-0.0327	8.63	0.859	0.125	7.32	0.564
SSc vs. NF ONLY	SNAPC2	small nuclear RNA activating complex, polypeptide 2, 45kDa	-0.783	10.5	0.00347	0.0406	9.66	0.877	0.461	11.9	0.0568
SSc vs. NF ONLY	SNX29	sorting nexin 29	-0.827	5.18	0.0108	0.033	5.33	0.848	0.342	4.09	0.201
SSc vs. NF ONLY	SNX33	sorting nexin 33	-0.739	10.5	0.0131	0.0892	10.1	0.542	0.488	10.3	0.0804
SSc vs. NF ONLY	SPINT2	serine peptidase inhibitor, Kunitz type, 2	-1.47	1.86	0.00355	-0.127	1.28	0.845	0.0421	1.56	0.859
SSc vs. NF ONLY	SPTBN1	spectrin, beta, non-erythrocytic 1	-1	19.5	0.0408	0.0191	19.7	0.898	0.178	13.6	0.553
SSc vs. NF ONLY	SRSF3	serine/arginine-rich splicing factor 3	0.622	40.7	0.0429	-0.0336	40.7	0.819	-0.595	43	0.119
SSc vs. NF ONLY	SS18L1	synovial sarcoma translocation gene on chromosome 18-like 1	0.701	1.71	0.0471	-0.00546	1.96	0.991	-0.741	1.71	0.0515
SSc vs. NF ONLY	STMN3	stathmin-like 3	-1.13	4.92	0.049	-0.0348	3.67	0.929	0.36	4.42	0.152
SSc vs. NF ONLY	TAGLN	transgelin	1.24	1340	0.0327	0.0284	1350	0.816	-0.437	2280	0.221
SSc vs. NF ONLY	TAX1BP3	Tax1 (human T-cell leukemia virus type I) binding protein 3	0.657	191	0.00206	-0.012	203	0.942	-0.575	174	0.0248
SSc vs. NF ONLY	TCN2	transcobalamin II	-0.809	4.38	0.0221	-0.158	3.78	0.545	0.262	4.27	0.235
SSc vs. NF ONLY	TDP1	tyrosyl-DNA phosphodiesterase 1	0.745	2.67	0.0331	-0.014	2.93	0.961	-0.505	3.09	0.0643
SSc vs. NF ONLY	TDRD7	tudor domain containing 7	-0.852	5.2	0.0188	-0.0892	4.74	0.59	0.24	5.67	0.262
SSc vs. NF ONLY	TGFB2	transforming growth factor, beta 2	2.79	3.06	0.0341	-0.101	3.52	0.527	-0.836	3.3	0.0753
SSc vs. NF ONLY	THAP6	THAP domain containing 6	0.696	2.51	0.0351	-0.163	2.56	0.32	-0.227	2.5	0.385
SSc vs. NF ONLY	THRA	thyroid hormone receptor, alpha	-0.686	9.12	0.0408	0.0547	9.2	0.724	0.321	9.1	0.124
SSc vs. NF ONLY	TIMM17A	translocase of inner mitochondrial membrane 17 homolog A (yeast)	0.663	43.6	0.0391	-0.0551	40.8	0.647	-0.388	50.3	0.219
SSc vs. NF ONLY	TMEM116	transmembrane protein 116	-0.982	1.21	0.0144	0.144	1.03	0.749	0.554	1.5	0.045
SSc vs. NF ONLY	TMEM194A	transmembrane protein 194A	-0.687	1.7	0.0252	-0.121	1.27	0.632	0.437	1.68	0.0918
SSc vs. NF ONLY	TNFRSF10C	tumor necrosis factor receptor superfamily, member 10c, decoy without an intracellular domain	-0.859	1.11	0.0339	0.0618	0.973	0.929	0.483	1.17	0.127
SSc vs. NF ONLY	TNFRSF6B	tumor necrosis factor receptor superfamily, member 6b, decoy	-1.93	3.39	0.00845	-0.0508	1.69	0.933	0.744	3.99	0.067
SSc vs. NF ONLY	TNFSF12	tumor necrosis factor (ligand) superfamily, member 12	-0.767	16.4	0.0174	0.0164	11.8	0.956	0.32	16.1	0.143
SSc vs. NF ONLY	TNFSF12-TNFSF13	TNFSF12-TNFSF13 readthrough	-0.703	7.99	0.0246	0.0572	5.77	0.802	0.322	7.65	0.142
SSc vs. NF ONLY	TNXB		-2.53	2.74	0.0376	0.0748	1.89	0.721	0.212	1.56	0.698
SSc vs. NF ONLY	TPM4	tropomyosin 4	0.649	329	0.0413	0.0138	341	0.928	-0.39	372	0.0906
SSc vs. NF ONLY	TPST1	tyrosylprotein sulfotransferase 1	0.992	26.4	0.00386	0.00981	32.3	0.962	-0.435	27.2	0.0841
SSc vs. NF ONLY	TRIM47	tripartite motif containing 47	-1.78	3.98	0.0113	-0.00716	1.48	0.993	0.459	3.76	0.181
SSc vs. NF ONLY	TUBB3	tubulin, beta 3 class III	1.72	70.3	0.00336	0.000793	83.4	0.998	-0.526	58.3	0.0191
SSc vs. NF ONLY	UBE2E3	ubiquitin-conjugating enzyme E2E 3	-0.594	19.7	0.0368	0.00187	17.8	0.996	0.442	19.1	0.0608
SSc vs. NF ONLY	UBR2	ubiquitin protein ligase E3 component n-recognin 2	-0.67	4.7	0.0271	-0.0126	4.58	0.95	0.283	3.47	0.188
SSc vs. NF ONLY	WASF1	WAS protein family, member 1	-0.611	5.68	0.0294	0.0606	5.32	0.788	0.31	5.4	0.107
SSc vs. NF ONLY	WDR12	WD repeat domain 12	0.596	7.29	0.0386	-0.142	6.98	0.277	-0.577	7.97	0.0307
SSc vs. NF ONLY	WDR18	WD repeat domain 18	0.776	17.4	0.0043	0.0233	23.8	0.899	-0.296	16.7	0.117
SSc vs. NF ONLY	ZC3H12C	zinc finger CCCH-type containing 12C	-0.805	1.08	0.0462	0.0469	1.02	0.898	0.516	1.27	0.0495
SSc vs. NF ONLY	ZCCHC24	zinc finger, CCHC domain containing 24	-0.763	20.5	0.0194	-0.0227	20.3	0.872	0.564	20.3	0.0302
SSc vs. NF ONLY	ZNF354A	zinc finger protein 354A	0.59	2.62	0.0424	-0.0313	2.62	0.926	-0.428	2.24	0.0578
TCZ W24 vs BL ONLY	AASDH	aminoadipate-semialdehyde dehydrogenase	-0.25	1.42	0.685	-0.0372	1.62	0.919	0.912	2.19	0.0196
TCZ W24 vs BL ONLY	ABCD1	ATP-binding cassette, sub-family D (ALD), member 1	0.509	7.67	0.335	0.164	8.83	0.15	-0.643	5.46	0.0372
TCZ W24 vs BL ONLY	ABCE1	ATP-binding cassette, sub-family E (OABP), member 1	0.464	14.7	0.088	-0.113	14.4	0.337	-0.962	13.1	0.00607
TCZ W24 vs BL ONLY	ABHD8	abhydrolase domain containing 8	-0.54	4.5	0.129	0.191	4.23	0.299	0.644	4.66	0.0294
TCZ W24 vs BL ONLY	ABL2	ABL proto-oncogene 2, non-receptor tyrosine kinase	0.728	5.84	0.332	-0.0821	8.7	0.545	-0.894	2.91	0.019
TCZ W24 vs BL ONLY	ABTB2	ankyrin repeat and BTB (POZ) domain containing 2	0.498	6.24	0.593	-0.0372	7.27	0.851	-1.2	3.69	0.0132
TCZ W24 vs BL ONLY	ACAD11	acyl-CoA dehydrogenase family, member 11	-0.238	5.11	0.768	0.0376	3.6	0.894	0.755	9.2	0.0252
TCZ W24 vs BL ONLY	ACBD3	acyl-CoA binding domain containing 3	0.404	23.2	0.257	0.00167	27.6	0.996	-0.626	14.6	0.0403
TCZ W24 vs BL ONLY	ACBD4	acyl-CoA binding domain containing 4	-0.846	1.24	0.0904	0.13	0.834	0.731	0.953	1.84	0.0107
TCZ W24 vs BL ONLY	ACCS	1-aminocyclopropane-1-carboxylate synthase homolog (Arabidopsis)(non-functional)	0.113	2.03	0.847	-0.0312	2.24	0.934	0.828	2.57	0.0293
TCZ W24 vs BL ONLY	ACKR3	atypical chemokine receptor 3	1.4	4.67	0.514	-0.13	14.8	0.484	-2.26	1.4	0.00478
TCZ W24 vs BL ONLY	ACN9	ACN9 homolog (S. cerevisiae)	-0.428	1.38	0.653	0.0555	1.32	0.927	1.18	2.4	0.0399
TCZ W24 vs BL ONLY	ACOT2	acyl-CoA thioesterase 2	0.554	7.96	0.0973	0.0621	8.2	0.716	-0.751	8.04	0.0198
TCZ W24 vs BL ONLY	ACTA2	actin, alpha 2, smooth muscle, aorta	1.8	221	0.0524	0.107	270	0.313	-1.48	252	0.0128
TCZ W24 vs BL ONLY	ACTG1	actin, gamma 1	0.759	2070	0.0556	0.00343	2170	0.989	-0.965	1880	0.00613
TCZ W24 vs BL ONLY	ACTG2	actin, gamma 2, smooth muscle, enteric	5.29	7.42	0.337	-0.0413	7.1	0.886	-1.11	182	0.0265
TCZ W24 vs BL ONLY	ACTN4	actinin, alpha 4	0.643	124	0.104	0.118	162	0.212	-0.952	107	0.0128
TCZ W24 vs BL ONLY	ACTR2	ARP2 actin-related protein 2 homolog (yeast)	0.518	58.7	0.103	-0.0479	73	0.767	-0.698	49.8	0.0272
TCZ W24 vs BL ONLY	ACTR6	ARP6 actin-related protein 6 homolog (yeast)	-0.115	4.07	0.867	0.0192	3.91	0.952	0.772	8.89	0.0398
TCZ W24 vs BL ONLY	ACVR1	activin A receptor, type I	0.366	23.5	0.47	0.00991	23.2	0.96	-1.01	18.1	0.0174
TCZ W24 vs BL ONLY	ACYP1	acylphosphatase 1, erythrocyte (common) type	-0.682	0.876	0.215	0.000126	0.787	1	0.977	1.12	0.0244
TCZ W24 vs BL ONLY	ADA	adenosine deaminase	0.974	9.43	0.0893	0.0734	13.9	0.668	-0.725	8.48	0.0136
TCZ W24 vs BL ONLY	ADAM12	ADAM metallopeptidase domain 12	1.32	55.9	0.251	-0.0333	117	0.791	-1.83	33.3	0.0105
TCZ W24 vs BL ONLY	ADAM33	ADAM metallopeptidase domain 33	-0.54	16.2	0.332	0.00994	13.2	0.964	0.846	22.8	0.0134
TCZ W24 vs BL ONLY	ADAMTS1	ADAM metallopeptidase with thrombospondin type 1 motif, 1	-0.757	23.6	0.184	0.155	27.6	0.227	1.41	30.1	0.00662
TCZ W24 vs BL ONLY	ADAMTS4	ADAM metallopeptidase with thrombospondin type 1 motif, 4	2.34	6.31	0.0587	-0.141	10.6	0.281	-2.19	2.29	0.0037
TCZ W24 vs BL ONLY	ADAMTS5	ADAM metallopeptidase with thrombospondin type 1 motif, 5	-0.375	1.86	0.692	0.356	2.89	0.0886	1.09	1.77	0.0191
TCZ W24 vs BL ONLY	ADAMTS6	ADAM metallopeptidase with thrombospondin type 1 motif, 6	0.717	3.47	0.173	-0.0607	3.74	0.728	-1.65	2.78	0.00916
TCZ W24 vs BL ONLY	ADAMTSL1	ADAMTS-like 1	-1.22	21.8	0.58	0.0271	27	0.856	0.658	2.27	0.0207
TCZ W24 vs BL ONLY	ADAP1	ArfGAP with dual PH domains 1	0.198	2.14	0.894	0.066	2.29	0.864	-0.845	1.13	0.0427
TCZ W24 vs BL ONLY	ADH1B	alcohol dehydrogenase 1B (class I), beta polypeptide	0.133	0.746	0.98	0.0209	0.357	0.978	1.81	13.7	0.00342
TCZ W24 vs BL ONLY	ADH5	alcohol dehydrogenase 5 (class III), chi polypeptide	-0.474	37.4	0.463	0.0377	25.9	0.769	0.899	66.1	0.0253
TCZ W24 vs BL ONLY	ADHFE1	alcohol dehydrogenase, iron containing, 1	-0.776	1.21	0.379	0.0944	0.525	0.883	1.07	1.92	0.0156
TCZ W24 vs BL ONLY	ADM	adrenomedullin	-1.34	33.9	0.064	0.113	31.5	0.526	2.21	75.7	0.00308
TCZ W24 vs BL ONLY	ADO	2-aminoethanethiol (cysteamine) dioxygenase	0.107	16.8	0.843	-0.119	17.5	0.224	-1.14	10.8	0.0098
TCZ W24 vs BL ONLY	ADORA2B	adenosine A2b receptor	-1.73	0.781	0.0121	-0.0222	0.411	0.986	1.22	1.01	0.0474
TCZ W24 vs BL ONLY	AEBP1	AE binding protein 1	0.247	152	0.75	-0.0327	224	0.782	-0.762	88.6	0.0497
TCZ W24 vs BL ONLY	AFAP1	actin filament associated protein 1	-0.942	24.1	0.157	-0.137	23.6	0.161	-0.877	12.6	0.0431
TCZ W24 vs BL ONLY	AFF4	AF4/FMR2 family, member 4	0.378	23.9	0.513	-0.0897	24.1	0.4	-0.846	13.8	0.0218
TCZ W24 vs BL ONLY	AGFG1	ArfGAP with FG repeats 1	0.218	7.81	0.633	-0.0923	7.32	0.32	-0.598	5.97	0.0144
TCZ W24 vs BL ONLY	AGO2	argonaute RISC catalytic component 2	0.064	5.77	0.944	-0.0469	5.27	0.803	-1.06	2.79	0.0307
TCZ W24 vs BL ONLY	AGO3	argonaute RISC catalytic component 3	0.444	2.65	0.134	-0.00552	2.87	0.991	-0.669	2.06	0.0241
TCZ W24 vs BL ONLY	AGTR1	angiotensin II receptor, type 1	0.945	4.18	0.292	-0.0447	6.75	0.844	-0.892	3.21	0.0243
TCZ W24 vs BL ONLY	AHCTF1	AT hook containing transcription factor 1	0.241	2.94	0.527	-0.0761	2.94	0.61	-0.709	1.87	0.029
TCZ W24 vs BL ONLY	AHCYL1	adenosylhomocysteinase-like 1	0.494	29.5	0.0622	-0.0655	32	0.52	-0.926	21.7	0.011
TCZ W24 vs BL ONLY	AHNAK	AHNAK nucleoprotein	-1.12	63.2	0.0956	0.0408	63.4	0.812	0.635	32	0.0434
TCZ W24 vs BL ONLY	AHRR	aryl-hydrocarbon receptor repressor	-0.842	4.71	0.0865	0.145	6.09	0.463	1.04	5	0.00376
TCZ W24 vs BL ONLY	AHSA1	AHA1, activator of heat shock 90kDa protein ATPase homolog 1 (yeast)	0.29	49	0.247	-0.0304	51.7	0.847	-0.726	37	0.00803
TCZ W24 vs BL ONLY	AHSA2	AHA1, activator of heat shock 90kDa protein ATPase homolog 2 (yeast)	-0.292	4.07	0.224	0.0459	4.1	0.795	0.652	4.42	0.026
TCZ W24 vs BL ONLY	AKIRIN1	akirin 1	0.517	24.8	0.0524	0.0153	23.9	0.937	-0.626	26.6	0.0145
TCZ W24 vs BL ONLY	AKR1B10	aldo-keto reductase family 1, member B10 (aldose reductase)	-1.89	2.04	0.127	-1.07	0.179	0.132	1.08	1.73	0.0226
TCZ W24 vs BL ONLY	AKR1C1	aldo-keto reductase family 1, member C1	-0.329	12.6	0.879	0.0822	6.17	0.745	1.03	43.5	0.0149
TCZ W24 vs BL ONLY	AKR1C2	aldo-keto reductase family 1, member C2	-0.116	2.63	0.931	-0.243	1.15	0.308	0.882	3.85	0.0295
TCZ W24 vs BL ONLY	AKR1C3	aldo-keto reductase family 1, member C3	-1.28	11.1	0.239	-0.12	5.69	0.635	1.42	22	0.0137
TCZ W24 vs BL ONLY	AKT3	v-akt murine thymoma viral oncogene homolog 3	0.606	11.9	0.169	0.00154	14.7	0.996	-0.912	7.87	0.00925
TCZ W24 vs BL ONLY	ALG2	ALG2, alpha-1,3/1,6-mannosyltransferase	0.445	17.9	0.0712	-0.0764	16.7	0.486	-0.646	17	0.0106
TCZ W24 vs BL ONLY	ALPK1	alpha-kinase 1	-1.09	1.29	0.0621	0.0475	1.25	0.883	1.44	1.37	0.00972
TCZ W24 vs BL ONLY	AMD1	adenosylmethionine decarboxylase 1	0.166	14.9	0.757	-0.069	11.5	0.628	-0.775	15	0.018
TCZ W24 vs BL ONLY	AMDHD2	amidohydrolase domain containing 2	-0.286	1.44	0.515	0.127	1.55	0.763	0.823	1.86	0.034
TCZ W24 vs BL ONLY	AMMECR1L	AMMECR1-like	0.733	10	0.0535	-0.0581	11.4	0.637	-0.946	6.76	0.00914
TCZ W24 vs BL ONLY	AMOTL2	angiomotin like 2	0.296	31.3	0.591	0.0887	38.5	0.467	-0.617	24.9	0.0461
TCZ W24 vs BL ONLY	AMPH	amphiphysin	0.905	4.22	0.115	0.00923	8.05	0.97	-0.847	3.6	0.0152
TCZ W24 vs BL ONLY	AMT	aminomethyltransferase	-1.12	0.494	0.276	0.0131	0.185	0.993	1.7	1.08	0.00338
TCZ W24 vs BL ONLY	AMZ1	archaelysin family metallopeptidase 1	0.986	1.36	0.123	-0.0969	1.31	0.676	-2.03	1.05	0.00579
TCZ W24 vs BL ONLY	AMZ2	archaelysin family metallopeptidase 2	-0.527	12.3	0.188	0.113	11.8	0.368	0.876	20	0.0266
TCZ W24 vs BL ONLY	ANAPC16	anaphase promoting complex subunit 16	-0.681	9.76	0.22	0.000846	7.68	0.998	0.966	19.1	0.0354
TCZ W24 vs BL ONLY	ANGPTL1	angiopoietin-like 1	-1.31	2.72	0.166	0.0603	2.03	0.791	0.802	2.25	0.0267
TCZ W24 vs BL ONLY	ANGPTL4	angiopoietin-like 4	1.47	29.7	0.43	-0.308	31.9	0.0985	-4.13	7.19	0.0154
TCZ W24 vs BL ONLY	ANK2	ankyrin 2, neuronal	-1.29	1	0.00251	0.0735	1.03	0.724	0.674	1.04	0.0397
TCZ W24 vs BL ONLY	ANKH	ANKH inorganic pyrophosphate transport regulator	0.236	8.49	0.759	-0.137	15.4	0.22	-1.29	5.38	0.00636
TCZ W24 vs BL ONLY	ANKRA2	ankyrin repeat, family A (RFXANK-like), 2	-0.325	3.32	0.656	0.0111	3.17	0.98	0.858	7.1	0.0243
TCZ W24 vs BL ONLY	ANKRD1	ankyrin repeat domain 1 (cardiac muscle)	-1.71	1.61	0.24	-0.387	1.07	0.295	-1.29	1.46	0.0128
TCZ W24 vs BL ONLY	ANKRD16	ankyrin repeat domain 16	-0.431	0.955	0.11	0.201	0.982	0.52	0.725	1.06	0.0236
TCZ W24 vs BL ONLY	ANKRD27	ankyrin repeat domain 27 (VPS9 domain)	0.404	6.98	0.134	-0.0726	7.61	0.595	-0.755	5.39	0.0209
TCZ W24 vs BL ONLY	ANKZF1	ankyrin repeat and zinc finger domain containing 1	-0.304	2.51	0.594	0.0443	2.5	0.883	1.23	3.64	0.00324
TCZ W24 vs BL ONLY	ANO1	anoctamin 1, calcium activated chloride channel	1.37	0.368	0.58	-0.219	0.241	0.356	-1.12	1.3	0.0224
TCZ W24 vs BL ONLY	ANO6	anoctamin 6	0.396	25.1	0.384	-0.0924	32.9	0.355	-0.96	14.5	0.0112
TCZ W24 vs BL ONLY	ANXA3	annexin A3	-0.61	1.15	0.503	-0.189	0.569	0.7	0.918	1.7	0.0327
TCZ W24 vs BL ONLY	AP1G2	adaptor-related protein complex 1, gamma 2 subunit	0.138	1.01	0.846	0.0419	0.683	0.917	0.962	1.62	0.00524
TCZ W24 vs BL ONLY	APAF1	apoptotic peptidase activating factor 1	0.53	4.96	0.0675	0.0231	6.5	0.897	-0.811	4.44	0.0187
TCZ W24 vs BL ONLY	APBA1	amyloid beta (A4) precursor protein-binding, family A, member 1	0.893	0.971	0.219	0.00707	1.01	0.99	-0.942	1.01	0.0437
TCZ W24 vs BL ONLY	APBB3	amyloid beta (A4) precursor protein-binding, family B, member 3	0.0602	1.87	0.944	0.269	1.92	0.467	0.795	3.06	0.0104
TCZ W24 vs BL ONLY	APCDD1	adenomatosis polyposis coli down-regulated 1	-0.816	2.86	0.284	-0.239	2	0.378	1.08	3.53	0.00405
TCZ W24 vs BL ONLY	APCDD1L	adenomatosis polyposis coli down-regulated 1-like	-0.306	33.3	0.661	-0.0873	34.2	0.469	-1.42	22.8	0.00441
TCZ W24 vs BL ONLY	APH1B	APH1B gamma secretase subunit	-0.272	3.18	0.614	0.0263	2.76	0.93	0.799	4.54	0.0248
TCZ W24 vs BL ONLY	APOBEC3G	apolipoprotein B mRNA editing enzyme, catalytic polypeptide-like 3G	-1.24	2.35	0.054	-0.105	1.32	0.824	1.25	4	0.0236
TCZ W24 vs BL ONLY	APOL2	apolipoprotein L, 2	-0.837	6.18	0.107	-0.02	7.04	0.95	0.936	7.88	0.00952
TCZ W24 vs BL ONLY	APOL6	apolipoprotein L, 6	-0.738	4.33	0.374	-0.133	4.94	0.467	1.08	5.39	0.0124
TCZ W24 vs BL ONLY	AQP1	aquaporin 1 (Colton blood group)	0.673	19.1	0.686	-0.302	45.7	0.164	-1.58	6.09	0.0148
TCZ W24 vs BL ONLY	AR	androgen receptor	0.83	0.362	0.615	0.0435	0.405	0.898	0.806	1.34	0.0256
TCZ W24 vs BL ONLY	ARHGAP10	Rho GTPase activating protein 10	0.249	11.6	0.346	-0.0867	11.3	0.456	-0.633	10.2	0.0198
TCZ W24 vs BL ONLY	ARHGAP11A	Rho GTPase activating protein 11A	0.0158	1.4	0.986	0.21	1.72	0.162	0.688	1.41	0.0143
TCZ W24 vs BL ONLY	ARHGAP12	Rho GTPase activating protein 12	-0.851	5.84	0.0587	-0.00453	6.06	0.991	0.893	5.72	0.00487
TCZ W24 vs BL ONLY	ARHGAP18	Rho GTPase activating protein 18	-1	5.9	0.105	-0.109	3.47	0.538	0.666	8.9	0.0135
TCZ W24 vs BL ONLY	ARHGAP20	Rho GTPase activating protein 20	-0.117	0.606	0.942	-0.0157	0.653	0.977	1.14	1.14	0.029
TCZ W24 vs BL ONLY	ARHGAP31	Rho GTPase activating protein 31	0.664	12.4	0.38	-0.0772	15.9	0.429	-1.68	7.03	0.00949
TCZ W24 vs BL ONLY	ARHGAP32	Rho GTPase activating protein 32	0.763	2.83	0.219	0.0693	4.52	0.71	-0.984	1.86	0.0326
TCZ W24 vs BL ONLY	ARHGAP5	Rho GTPase activating protein 5	0.228	5.89	0.757	-0.154	8.05	0.132	-0.709	3.4	0.0385
TCZ W24 vs BL ONLY	ARHGEF28	Rho guanine nucleotide exchange factor (GEF) 28	0.43	0.433	0.833	-0.188	0.226	0.525	-0.805	1.32	0.0291
TCZ W24 vs BL ONLY	ARHGEF40	Rho guanine nucleotide exchange factor (GEF) 40	0.84	56.6	0.0704	-0.0428	59.7	0.704	-1.51	35.3	0.0166
TCZ W24 vs BL ONLY	ARID5A	AT rich interactive domain 5A (MRF1-like)	0.614	8.64	0.305	-0.087	8.46	0.657	-1.44	5.3	0.00952
TCZ W24 vs BL ONLY	ARL10	ADP-ribosylation factor-like 10	0.566	3.3	0.037	0.0143	3.82	0.962	-0.718	2.51	0.0137
TCZ W24 vs BL ONLY	ARL13B	ADP-ribosylation factor-like 13B	0.18	3.4	0.801	-0.043	4.19	0.813	-0.633	1.77	0.0299
TCZ W24 vs BL ONLY	ARL5A	ADP-ribosylation factor-like 5A	0.511	8.7	0.0095	-0.146	9.98	0.424	-0.815	7.61	0.0088
TCZ W24 vs BL ONLY	ARL6IP5	ADP-ribosylation factor-like 6 interacting protein 5	-0.619	47.7	0.184	-0.0131	30.2	0.952	0.734	56.7	0.0184
TCZ W24 vs BL ONLY	ARL8A	ADP-ribosylation factor-like 8A	0.467	18.2	0.264	0.0357	17	0.86	-0.936	13.7	0.00676
TCZ W24 vs BL ONLY	ARMCX1	armadillo repeat containing, X-linked 1	-0.66	9.13	0.0557	0.0188	8.31	0.947	1.09	10.6	0.00811
TCZ W24 vs BL ONLY	ARMCX6	armadillo repeat containing, X-linked 6	-0.502	4.16	0.372	0.0284	3.66	0.933	0.825	7.19	0.0498
TCZ W24 vs BL ONLY	ARNTL	aryl hydrocarbon receptor nuclear translocator-like	0.698	7.53	0.105	-0.0976	8.4	0.626	-0.787	6.38	0.0228
TCZ W24 vs BL ONLY	ARNTL2	aryl hydrocarbon receptor nuclear translocator-like 2	0.616	4.23	0.376	-0.15	3.4	0.456	-1	4.91	0.00342
TCZ W24 vs BL ONLY	ARRDC4	arrestin domain containing 4	0.795	2.18	0.245	0.0753	2.17	0.83	0.996	4.91	0.00551
TCZ W24 vs BL ONLY	AS3MT	arsenite methyltransferase	-0.506	0.974	0.216	0.0994	0.931	0.819	0.729	1.14	0.049
TCZ W24 vs BL ONLY	ASB13	ankyrin repeat and SOCS box containing 13	-0.31	2.21	0.51	0.0527	2.11	0.858	0.629	2.59	0.018
TCZ W24 vs BL ONLY	ASB16	ankyrin repeat and SOCS box containing 16	-0.173	0.739	0.783	-0.0497	0.677	0.95	0.972	1.22	0.014
TCZ W24 vs BL ONLY	ASCC1	activating signal cointegrator 1 complex subunit 1	-0.446	4.45	0.348	0.0642	4.18	0.697	0.779	6.28	0.0434
TCZ W24 vs BL ONLY	ASCC2	activating signal cointegrator 1 complex subunit 2	0.549	15.6	0.0142	0.0134	18.1	0.945	-0.619	14.6	0.0233
TCZ W24 vs BL ONLY	ASUN	asunder spermatogenesis regulator	0.486	7.42	0.224	0.0513	7.54	0.788	-0.774	7.37	0.0191
TCZ W24 vs BL ONLY	ATAD3B	ATPase family, AAA domain containing 3B	0.575	3.26	0.237	-0.0649	2.86	0.764	-0.819	3.44	0.0391
TCZ W24 vs BL ONLY	ATF3	activating transcription factor 3	0.806	2.16	0.25	-0.101	2.2	0.755	0.816	2.75	0.0268
TCZ W24 vs BL ONLY	ATG101	autophagy related 101	0.109	41.5	0.808	-0.0151	41.6	0.938	-0.797	31.1	0.012
TCZ W24 vs BL ONLY	ATG14	autophagy related 14	-0.517	3.08	0.0472	-0.0125	2.89	0.974	0.632	3.77	0.0174
TCZ W24 vs BL ONLY	ATG4C	autophagy related 4C, cysteine peptidase	-0.155	2.14	0.807	0.0201	2.28	0.964	0.684	2.56	0.0304
TCZ W24 vs BL ONLY	ATG4D	autophagy related 4D, cysteine peptidase	0.395	4.99	0.305	0.00553	5.12	0.991	-0.641	4.3	0.0396
TCZ W24 vs BL ONLY	ATHL1	ATH1, acid trehalase-like 1 (yeast)	-0.307	1.78	0.536	0.161	1.24	0.433	0.783	2.32	0.00869
TCZ W24 vs BL ONLY	ATP10A	ATPase, class V, type 10A	1.07	27.8	0.0727	-0.0707	35.4	0.499	-2.12	14.1	0.00409
TCZ W24 vs BL ONLY	ATP10D	ATPase, class V, type 10D	0.322	7.75	0.624	-0.0239	8.56	0.899	-0.896	4.93	0.0158
TCZ W24 vs BL ONLY	ATP11B	ATPase, class VI, type 11B	0.151	5.85	0.834	-0.0869	8.63	0.542	-0.612	3.49	0.0421
TCZ W24 vs BL ONLY	ATP13A2	ATPase type 13A2	0.614	14.2	0.0847	-0.000654	17.4	0.998	-1.61	11.5	0.00993
TCZ W24 vs BL ONLY	ATP13A3	ATPase type 13A3	0.86	31.7	0.245	-0.124	31.5	0.164	-1.62	15.6	0.00472
TCZ W24 vs BL ONLY	ATP2A2	ATPase, Ca++ transporting, cardiac muscle, slow twitch 2	0.741	54.3	0.144	-0.0264	58.2	0.824	-0.924	33.8	0.0184
TCZ W24 vs BL ONLY	ATP5S	ATP synthase, H+ transporting, mitochondrial Fo complex, subunit s (factor B)	-0.189	1.36	0.693	0.0763	1.2	0.827	0.891	2.19	0.0293
TCZ W24 vs BL ONLY	ATP6V0A2	ATPase, H+ transporting, lysosomal V0 subunit a2	0.494	5.97	0.177	-0.143	5.88	0.167	-1.17	4.37	0.00729
TCZ W24 vs BL ONLY	ATP6V0B	ATPase, H+ transporting, lysosomal 21kDa, V0 subunit b	0.691	26.2	0.0647	0.0312	26.1	0.871	-0.881	29.5	0.0183
TCZ W24 vs BL ONLY	AUH	AU RNA binding protein/enoyl-CoA hydratase	-0.544	1.96	0.216	-0.0141	1.77	0.982	1.22	3.34	0.0129
TCZ W24 vs BL ONLY	AUTS2	autism susceptibility candidate 2	0.663	10.6	0.32	-0.00125	11.8	0.997	-2.01	5.95	0.00733
TCZ W24 vs BL ONLY	AVEN	apoptosis, caspase activation inhibitor	0.207	13.5	0.427	-0.0158	14.5	0.946	-0.66	12.2	0.0262
TCZ W24 vs BL ONLY	B3GALT4		-0.977	2.78	0.0661	0.199	1.41	0.527	0.8	3.06	0.0268
TCZ W24 vs BL ONLY	B3GALTL	beta 1,3-galactosyltransferase-like	0.232	5.19	0.643	-0.0115	5.55	0.965	-0.779	3.95	0.00733
TCZ W24 vs BL ONLY	B3GNT2	UDP-GlcNAc:betaGal beta-1,3-N-acetylglucosaminyltransferase 2	0.824	5.13	0.0898	-0.104	5.16	0.566	-1.23	4.17	0.00522
TCZ W24 vs BL ONLY	B4GALT4	UDP-Gal:betaGlcNAc beta 1,4- galactosyltransferase, polypeptide 4	0.41	10.9	0.39	-0.0852	12	0.518	-0.79	8.35	0.0193
TCZ W24 vs BL ONLY	B9D1	B9 protein domain 1	-0.561	2.12	0.293	-0.0495	1.63	0.899	0.703	2.86	0.0447
TCZ W24 vs BL ONLY	BAG3	BCL2-associated athanogene 3	0.581	50.1	0.189	0.0479	57.7	0.694	-0.976	34.2	0.00413
TCZ W24 vs BL ONLY	BAMBI	BMP and activin membrane-bound inhibitor	0.333	4.01	0.705	0.191	6.12	0.31	-0.713	2.98	0.0123
TCZ W24 vs BL ONLY	BATF2	basic leucine zipper transcription factor, ATF-like 2	-2.53	0.92	0.0393	0.141	0.459	0.83	2.35	1.22	0.00331
TCZ W24 vs BL ONLY	BBC3	BCL2 binding component 3	-0.8	2.78	0.238	0.153	3.23	0.455	1.55	3.61	0.00352
TCZ W24 vs BL ONLY	BBS10	Bardet-Biedl syndrome 10	-0.316	3.42	0.605	0.0163	3.47	0.959	0.873	5.1	0.025
TCZ W24 vs BL ONLY	BBS2	Bardet-Biedl syndrome 2	-0.529	7.18	0.0306	0.026	6.92	0.893	0.617	9.37	0.0191
TCZ W24 vs BL ONLY	BBS4	Bardet-Biedl syndrome 4	-0.448	4.36	0.427	0.0381	4.17	0.872	0.898	8.09	0.0299
TCZ W24 vs BL ONLY	BCAR1	breast cancer anti-estrogen resistance 1	0.0451	14.1	0.954	0.116	12.9	0.272	-0.758	10.3	0.0331
TCZ W24 vs BL ONLY	BCAR3	breast cancer anti-estrogen resistance 3	-0.0434	15.2	0.929	0.0143	15.9	0.943	-0.691	10.9	0.0299
TCZ W24 vs BL ONLY	BCL7A	B-cell CLL/lymphoma 7A	0.605	1.99	0.305	-0.0801	1.97	0.764	-1.56	1.52	0.00717
TCZ W24 vs BL ONLY	BCL9L	B-cell CLL/lymphoma 9-like	0.912	29	0.0946	0.152	39.4	0.153	-1.05	14.9	0.0143
TCZ W24 vs BL ONLY	BCOR	BCL6 corepressor	0.469	4.36	0.626	-0.0954	3.9	0.446	-2.03	2.15	0.0105
TCZ W24 vs BL ONLY	BDKRB2	bradykinin receptor B2	-0.414	8.11	0.797	-0.241	3.85	0.113	0.926	36.5	0.0136
TCZ W24 vs BL ONLY	BDNF	brain-derived neurotrophic factor	0.718	3.15	0.555	0.0751	2.09	0.669	-0.67	5.31	0.0299
TCZ W24 vs BL ONLY	BEND7	BEN domain containing 7	0.365	1.51	0.594	0.0411	1.5	0.869	-1.26	1.06	0.00565
TCZ W24 vs BL ONLY	BEST1	bestrophin 1	-0.296	1.52	0.422	0.0119	1.4	0.981	0.603	1.97	0.0129
TCZ W24 vs BL ONLY	BGN	biglycan	0.0159	583	0.983	0.00993	709	0.95	-0.825	441	0.0393
TCZ W24 vs BL ONLY	BICD1	bicaudal D homolog 1 (Drosophila)	0.301	2.27	0.521	-0.0959	2.28	0.432	-1.03	1.27	0.0246
TCZ W24 vs BL ONLY	BICD2	bicaudal D homolog 2 (Drosophila)	0.407	9.13	0.416	-0.0331	10.4	0.817	-0.733	6.12	0.0412
TCZ W24 vs BL ONLY	BIRC3	baculoviral IAP repeat containing 3	-1.65	0.796	0.177	-0.331	0.171	0.328	1.32	1.61	0.00867
TCZ W24 vs BL ONLY	BLOC1S3	biogenesis of lysosomal organelles complex-1, subunit 3	0.588	6.61	0.133	0.00668	7.22	0.987	-0.861	4.52	0.01
TCZ W24 vs BL ONLY	BLVRB	biliverdin reductase B (flavin reductase (NADPH))	-0.481	25.6	0.163	-0.012	23.2	0.966	0.75	38.3	0.0474
TCZ W24 vs BL ONLY	BMP2	bone morphogenetic protein 2	1.45	2.46	0.515	-0.312	1.73	0.0747	-2.13	2.78	0.0227
TCZ W24 vs BL ONLY	BMP6	bone morphogenetic protein 6	0.391	11.9	0.422	-0.0157	13.9	0.941	-1.16	7.79	0.00342
TCZ W24 vs BL ONLY	BMPR2	bone morphogenetic protein receptor, type II (serine/threonine kinase)	1.09	23.9	0.123	-0.14	35.5	0.242	-1.71	13.2	0.00644
TCZ W24 vs BL ONLY	BMS1	BMS1 ribosome biogenesis factor	0.585	4.53	0.218	-0.0494	5.18	0.714	-0.812	2.75	0.0356
TCZ W24 vs BL ONLY	BNC1	basonuclin 1	-0.237	5.78	0.837	-0.056	7.24	0.776	-1.67	2.8	0.00338
TCZ W24 vs BL ONLY	BNC2	basonuclin 2	-0.72	1.74	0.241	-0.0147	2.13	0.949	0.981	1.76	0.0231
TCZ W24 vs BL ONLY	BOK	BCL2-related ovarian killer	0.385	27.4	0.432	0.0446	32.4	0.782	-0.66	23.5	0.0228
TCZ W24 vs BL ONLY	BOLA1	bolA family member 1	-0.11	3.95	0.921	-0.1	3.81	0.795	1.07	7.19	0.0223
TCZ W24 vs BL ONLY	BPGM	2,3-bisphosphoglycerate mutase	0.975	16.4	0.378	-0.0128	13.9	0.952	-1.29	29	0.0161
TCZ W24 vs BL ONLY	BRD8	bromodomain containing 8	-0.328	4.59	0.455	0.0958	4.65	0.428	0.655	6.65	0.0174
TCZ W24 vs BL ONLY	BRPF1	bromodomain and PHD finger containing, 1	0.294	4.9	0.441	-0.0273	5.16	0.887	-0.699	3.2	0.0352
TCZ W24 vs BL ONLY	BST2	bone marrow stromal cell antigen 2	-1.39	8.62	0.161	-0.12	8.17	0.802	0.757	11.5	0.0231
TCZ W24 vs BL ONLY	BTBD3	BTB (POZ) domain containing 3	-0.172	4.39	0.622	-0.0605	4.11	0.731	0.59	4.72	0.0316
TCZ W24 vs BL ONLY	BVES	blood vessel epicardial substance	0.0324	6.57	0.966	0.00362	7.29	0.991	-0.598	4.7	0.0483
TCZ W24 vs BL ONLY	BYSL	bystin-like	0.601	14.5	0.139	-0.0697	14.6	0.657	-1.21	8.65	0.00398
TCZ W24 vs BL ONLY	BZW2	basic leucine zipper and W2 domains 2	0.464	30.5	0.204	-0.0823	25.9	0.586	-0.61	30.6	0.0302
TCZ W24 vs BL ONLY	C10orf10	chromosome 10 open reading frame 10	0.0812	0.63	0.98	0.0677	0.708	0.897	3	1.48	0.00473
TCZ W24 vs BL ONLY	C11orf70	chromosome 11 open reading frame 70	-0.591	0.913	0.407	0.0798	0.921	0.874	1.02	1.82	0.0249
TCZ W24 vs BL ONLY	C11orf71	chromosome 11 open reading frame 71	-0.266	0.957	0.705	0.137	0.915	0.803	1.1	1.26	0.00701
TCZ W24 vs BL ONLY	C11orf84	chromosome 11 open reading frame 84	0.0964	8.47	0.834	0.0532	7.86	0.788	-0.668	7.78	0.0174
TCZ W24 vs BL ONLY	C11orf96	chromosome 11 open reading frame 96	-0.892	26.8	0.307	-0.0926	20.1	0.719	-1.04	16.5	0.0134
TCZ W24 vs BL ONLY	C12orf73	chromosome 12 open reading frame 73	1.24	1.89	0.0977	0.179	1.95	0.587	-1.06	2.3	0.0115
TCZ W24 vs BL ONLY	C14orf169	chromosome 14 open reading frame 169	0.193	4.77	0.641	0.00609	4.84	0.99	-0.602	3.18	0.0378
TCZ W24 vs BL ONLY	C14orf79	chromosome 14 open reading frame 79	-0.25	1.11	0.672	0.0974	0.993	0.769	0.593	1.57	0.0325
TCZ W24 vs BL ONLY	C15orf52	chromosome 15 open reading frame 52	-0.134	1.65	0.921	0.00814	1.17	0.987	0.892	5.42	0.0418
TCZ W24 vs BL ONLY	C15orf65	chromosome 15 open reading frame 65	-1.06	0.663	0.12	-0.169	0.602	0.874	1.49	1.21	0.0228
TCZ W24 vs BL ONLY	C16orf52	chromosome 16 open reading frame 52	0.298	2.39	0.483	-0.0239	2.37	0.939	-0.713	1.83	0.0199
TCZ W24 vs BL ONLY	C16orf72	chromosome 16 open reading frame 72	0.282	15.9	0.493	-0.00968	17.4	0.961	-0.636	11.7	0.0157
TCZ W24 vs BL ONLY	C16orf74	chromosome 16 open reading frame 74	0.0266	1.15	0.987	0.132	0.729	0.851	1.43	3.16	0.0102
TCZ W24 vs BL ONLY	C16orf87	chromosome 16 open reading frame 87	1.46	6.34	0.118	0.142	6.64	0.418	-1.3	7.87	0.00426
TCZ W24 vs BL ONLY	C16orf95	chromosome 16 open reading frame 95	-0.722	1.34	0.17	0.452	1.44	0.328	0.77	1.4	0.047
TCZ W24 vs BL ONLY	C17orf58	chromosome 17 open reading frame 58	-0.588	1.75	0.202	0.117	1.45	0.787	1.08	2.87	0.0157
TCZ W24 vs BL ONLY	C17orf75	chromosome 17 open reading frame 75	-0.128	1.23	0.901	0.0862	1.16	0.795	1.04	2.96	0.03
TCZ W24 vs BL ONLY	C17orf85	chromosome 17 open reading frame 85	0.424	5.42	0.0597	0.0604	5.62	0.659	-0.724	4.83	0.0215
TCZ W24 vs BL ONLY	C18orf8	chromosome 18 open reading frame 8	0.425	8.85	0.105	-0.116	9	0.446	-0.637	6.88	0.0122
TCZ W24 vs BL ONLY	C19orf40	chromosome 19 open reading frame 40	-0.2	1.17	0.723	-0.0275	1.17	0.978	0.696	1.21	0.0494
TCZ W24 vs BL ONLY	C19orf54	chromosome 19 open reading frame 54	-0.287	1.75	0.372	0.0691	2	0.826	0.771	1.84	0.0107
TCZ W24 vs BL ONLY	C19orf71	chromosome 19 open reading frame 71	0.654	6.37	0.238	0.0749	6.29	0.688	-1.26	5.33	0.0106
TCZ W24 vs BL ONLY	C1orf198	chromosome 1 open reading frame 198	0.296	38.9	0.674	0.0211	42	0.897	-1.08	27.5	0.00751
TCZ W24 vs BL ONLY	C20orf196	chromosome 20 open reading frame 196	-0.509	0.793	0.475	0.0786	0.715	0.947	1.17	1.11	0.0237
TCZ W24 vs BL ONLY	C20orf96	chromosome 20 open reading frame 96	-0.346	1.31	0.479	0.0319	1.04	0.951	0.638	2.28	0.0189
TCZ W24 vs BL ONLY	C22orf23	chromosome 22 open reading frame 23	0.304	3.32	0.658	-0.0415	3.32	0.897	-0.769	2.9	0.0478
TCZ W24 vs BL ONLY	C22orf46	chromosome 22 open reading frame 46	-0.399	2.09	0.124	0.0924	2.1	0.646	0.758	2.38	0.0234
TCZ W24 vs BL ONLY	C2CD2	C2 calcium-dependent domain containing 2	-0.75	6.04	0.15	-0.0398	4.33	0.794	-1.31	4.17	0.0227
TCZ W24 vs BL ONLY	C2CD5	C2 calcium-dependent domain containing 5	-0.605	3.25	0.0915	0.00491	3.36	0.991	0.632	3.21	0.0424
TCZ W24 vs BL ONLY	C2orf68	chromosome 2 open reading frame 68	-0.373	2.69	0.379	0.00514	2.88	0.991	0.595	2.66	0.0227
TCZ W24 vs BL ONLY	C2orf81	chromosome 2 open reading frame 81	-0.4	1.36	0.376	0.135	1.5	0.676	0.932	1.7	0.0067
TCZ W24 vs BL ONLY	C3orf52	chromosome 3 open reading frame 52	1.76	1.95	0.0619	-0.0264	2.14	0.95	-2.8	1.39	0.00308
TCZ W24 vs BL ONLY	C3orf55	PQ loop repeat containing 2-like	-0.581	0.485	0.47	0.303	0.398	0.504	1.13	1.14	0.0124
TCZ W24 vs BL ONLY	C4orf29	chromosome 4 open reading frame 29	0.0251	0.907	0.974	-0.247	0.84	0.395	0.734	1.44	0.019
TCZ W24 vs BL ONLY	C4orf32	chromosome 4 open reading frame 32	0.0228	3.54	0.983	0.0467	4.37	0.911	-0.74	2.07	0.0136
TCZ W24 vs BL ONLY	C4orf33	chromosome 4 open reading frame 33	-0.719	1.38	0.318	0.0984	0.877	0.833	1.02	3.6	0.0434
TCZ W24 vs BL ONLY	C4orf36	chromosome 4 open reading frame 36	-0.434	0.352	0.724	0.419	0.266	0.607	1.51	1.25	0.00919
TCZ W24 vs BL ONLY	C5orf55	chromosome 5 open reading frame 55	-0.334	1.07	0.557	0.192	1.06	0.66	0.888	1.52	0.023
TCZ W24 vs BL ONLY	C6orf1	chromosome 6 open reading frame 1	-0.839	8.92	0.0603	-0.0205	6.81	0.952	0.725	11.6	0.0208
TCZ W24 vs BL ONLY	C6orf226	chromosome 6 open reading frame 226	-0.385	5.23	0.434	0.262	5.06	0.367	0.728	8.3	0.0328
TCZ W24 vs BL ONLY	C6orf57	chromosome 6 open reading frame 57	-0.272	2.71	0.792	0.00678	2.51	0.996	1.38	7.97	0.0202
TCZ W24 vs BL ONLY	C9orf3	chromosome 9 open reading frame 3	0.0127	11.3	0.99	0.0102	9.12	0.961	-0.949	13.1	0.0174
TCZ W24 vs BL ONLY	CABLES1	Cdk5 and Abl enzyme substrate 1	0.754	6	0.373	-0.0371	6.84	0.859	-1.28	4.72	0.0449
TCZ W24 vs BL ONLY	CABYR	calcium binding tyrosine-(Y)-phosphorylation regulated	0.0744	0.976	0.899	-0.0395	1.07	0.941	0.804	1.42	0.0403
TCZ W24 vs BL ONLY	CACNA2D1	calcium channel, voltage-dependent, alpha 2/delta subunit 1	0.555	4.82	0.142	-0.0368	4.83	0.855	-0.592	4.19	0.036
TCZ W24 vs BL ONLY	CACNB1	calcium channel, voltage-dependent, beta 1 subunit	-0.64	1.27	0.124	0.165	1.26	0.494	0.668	1.28	0.0171
TCZ W24 vs BL ONLY	CACNB3	calcium channel, voltage-dependent, beta 3 subunit	-0.344	4.93	0.477	0.0175	4.5	0.952	0.726	6.72	0.00702
TCZ W24 vs BL ONLY	CALD1	caldesmon 1	0.775	294	0.0688	-0.0201	286	0.897	-1.47	279	0.0122
TCZ W24 vs BL ONLY	CAMKK1	calcium/calmodulin-dependent protein kinase kinase 1, alpha	0.654	1.93	0.256	-0.103	2.37	0.587	-1.51	1.5	0.00555
TCZ W24 vs BL ONLY	CAMKMT	calmodulin-lysine N-methyltransferase	-0.267	1.13	0.635	-0.289	0.83	0.529	0.652	1.44	0.0496
TCZ W24 vs BL ONLY	CAMLG	calcium modulating ligand	-0.46	14	0.332	0.0052	12.3	0.989	0.744	22.6	0.0217
TCZ W24 vs BL ONLY	CAMSAP2	calmodulin regulated spectrin-associated protein family, member 2	0.269	11.4	0.591	-0.0629	12.1	0.612	-0.679	6.93	0.0308
TCZ W24 vs BL ONLY	CAP2	CAP, adenylate cyclase-associated protein, 2 (yeast)	0.258	8.45	0.615	0.0825	7.23	0.589	-0.66	7.37	0.0113
TCZ W24 vs BL ONLY	CAPN12	calpain 12	0.589	7.35	0.145	0.116	9.2	0.296	-0.86	6.05	0.0181
TCZ W24 vs BL ONLY	CAPS	calcyphosine	-0.962	1.18	0.177	0.103	1.4	0.772	1.07	1.4	0.0129
TCZ W24 vs BL ONLY	CARD16	caspase recruitment domain family, member 16	-0.853	2.36	0.651	-0.11	0.624	0.895	1.29	11.3	0.0117
TCZ W24 vs BL ONLY	CARF	calcium responsive transcription factor	-0.502	0.631	0.256	0.138	0.579	0.69	0.737	1.03	0.0207
TCZ W24 vs BL ONLY	CARHSP1	calcium regulated heat stable protein 1, 24kDa	-0.302	13.1	0.483	0.000709	11.3	0.998	0.645	15.7	0.0439
TCZ W24 vs BL ONLY	CASP1	caspase 1, apoptosis-related cysteine peptidase	-1.53	4.8	0.149	0.0865	0.727	0.847	1.39	7.1	0.00333
TCZ W24 vs BL ONLY	CASP8	caspase 8, apoptosis-related cysteine peptidase	-0.238	2.18	0.447	0.025	2.25	0.939	0.795	2.71	0.0129
TCZ W24 vs BL ONLY	CASS4	Cas scaffolding protein family member 4	-1.99	2.24	0.0969	-0.0845	0.708	0.841	1.53	4.2	0.00514
TCZ W24 vs BL ONLY	CBFB	core-binding factor, beta subunit	0.76	34.1	0.0734	-0.0617	35	0.611	-1.76	17	0.00382
TCZ W24 vs BL ONLY	CBL	Cbl proto-oncogene, E3 ubiquitin protein ligase	0.434	4.1	0.514	-0.0235	4.41	0.9	-0.745	2.44	0.0362
TCZ W24 vs BL ONLY	CBLB	Cbl proto-oncogene B, E3 ubiquitin protein ligase	0.00599	4.96	0.994	-0.0716	5.81	0.602	-0.671	3.74	0.0243
TCZ W24 vs BL ONLY	CBLN3	cerebellin 3 precursor	-0.328	2.05	0.25	0.073	2.1	0.815	1.18	2.43	0.00405
TCZ W24 vs BL ONLY	CBR4	carbonyl reductase 4	0.684	5.79	0.267	-0.0034	6.14	0.992	-0.642	7.14	0.0235
TCZ W24 vs BL ONLY	CC2D2A	coiled-coil and C2 domain containing 2A	-0.781	1.5	0.29	0.0394	0.813	0.9	0.9	1.84	0.0133
TCZ W24 vs BL ONLY	CCBL2	cysteine conjugate-beta lyase 2	-0.589	9.71	0.201	-0.0535	8.67	0.783	1.01	12.5	0.023
TCZ W24 vs BL ONLY	CCDC115	coiled-coil domain containing 115	-0.34	4.15	0.309	0.148	3.92	0.433	0.732	5.86	0.0228
TCZ W24 vs BL ONLY	CCDC122	coiled-coil domain containing 122	-0.926	0.981	0.0257	0.126	0.898	0.83	1.49	1.64	0.00352
TCZ W24 vs BL ONLY	CCDC125	coiled-coil domain containing 125	-0.0754	0.647	0.923	0.257	0.575	0.49	0.809	1.06	0.0307
TCZ W24 vs BL ONLY	CCDC152	coiled-coil domain containing 152	-0.201	3.65	0.86	-0.0644	2.62	0.783	0.877	7.54	0.0389
TCZ W24 vs BL ONLY	CCDC23	coiled-coil domain containing 23	-0.693	10.9	0.177	0.00252	9.61	0.997	0.959	22.7	0.0223
TCZ W24 vs BL ONLY	CCDC28A	coiled-coil domain containing 28A	-0.693	4.07	0.193	0.116	3.81	0.676	1.14	6.92	0.022
TCZ W24 vs BL ONLY	CCDC47	coiled-coil domain containing 47	0.404	24.8	0.293	-0.0318	27.4	0.812	-0.691	16.2	0.0184
TCZ W24 vs BL ONLY	CCDC68	coiled-coil domain containing 68	0.831	0.168	0.705	-0.0902	0.0949	0.917	0.727	1.05	0.0293
TCZ W24 vs BL ONLY	CCDC71L	coiled-coil domain containing 71-like	-0.12	20.2	0.88	-0.0955	21.5	0.381	-1.02	11.6	0.0223
TCZ W24 vs BL ONLY	CCDC86	coiled-coil domain containing 86	0.484	13.6	0.277	-0.144	13.2	0.235	-1.05	9.99	0.00534
TCZ W24 vs BL ONLY	CCDC93	coiled-coil domain containing 93	0.8	9.1	0.0646	-0.0399	10.3	0.769	-1.15	5.59	0.0128
TCZ W24 vs BL ONLY	CCIN	calicin	0.775	3.32	0.285	-0.0871	4.74	0.731	-1.76	2.03	0.00493
TCZ W24 vs BL ONLY	CCL11	chemokine (C-C motif) ligand 11	-0.662	1.36	0.699	-0.981	0.901	0.113	1.38	2.58	0.0291
TCZ W24 vs BL ONLY	CCNG2	cyclin G2	-0.888	4.48	0.0556	0.119	4.3	0.355	1.41	5.39	0.00688
TCZ W24 vs BL ONLY	CCNJ	cyclin J	0.779	1.96	0.0713	-0.0086	1.97	0.986	-0.983	1.49	0.0162
TCZ W24 vs BL ONLY	CCNY	cyclin Y	0.32	16	0.29	-0.0204	21.9	0.887	-0.67	12.6	0.024
TCZ W24 vs BL ONLY	CCRN4L	CCR4 carbon catabolite repression 4-like (S. cerevisiae)	0.526	6.59	0.299	-0.0433	7.83	0.824	-1.27	4.14	0.00611
TCZ W24 vs BL ONLY	CCT2	chaperonin containing TCP1, subunit 2 (beta)	0.437	60.5	0.0209	-0.0768	58.6	0.422	-0.946	55.4	0.0037
TCZ W24 vs BL ONLY	CCT6A	chaperonin containing TCP1, subunit 6A (zeta 1)	0.381	46.3	0.0448	-0.0406	48.1	0.724	-0.604	41.8	0.0146
TCZ W24 vs BL ONLY	CCT6B	chaperonin containing TCP1, subunit 6B (zeta 2)	-0.639	0.918	0.234	0.102	0.737	0.867	0.981	1.25	0.0301
TCZ W24 vs BL ONLY	CD27	CD27 molecule	-0.758	1.1	0.0916	-0.115	0.719	0.874	0.882	1.46	0.0182
TCZ W24 vs BL ONLY	CD274	CD274 molecule	1.09	2.09	0.456	-0.321	1.65	0.158	-2.3	1.68	0.00477
TCZ W24 vs BL ONLY	CD55	CD55 molecule, decay accelerating factor for complement (Cromer blood group)	0.508	12.1	0.387	-0.0198	11.4	0.918	-0.69	12	0.0392
TCZ W24 vs BL ONLY	CDC27	cell division cycle 27	0.17	14.5	0.354	-0.0881	13.7	0.375	-0.602	13.3	0.0198
TCZ W24 vs BL ONLY	CDC42EP1	CDC42 effector protein (Rho GTPase binding) 1	0.232	60.4	0.731	0.0852	60	0.545	-0.899	43.3	0.0227
TCZ W24 vs BL ONLY	CDC42EP2	CDC42 effector protein (Rho GTPase binding) 2	-0.839	9.4	0.0891	-0.00845	9.31	0.979	1.07	11.3	0.0124
TCZ W24 vs BL ONLY	CDC42SE1	CDC42 small effector 1	0.543	27.3	0.0632	-0.0818	26.5	0.386	-0.944	24.7	0.00958
TCZ W24 vs BL ONLY	CDC7	cell division cycle 7	-0.403	0.624	0.709	0.000974	0.793	0.999	1.28	1.01	0.0157
TCZ W24 vs BL ONLY	CDH6	cadherin 6, type 2, K-cadherin (fetal kidney)	3.74	2.39	0.327	0.0627	2.5	0.748	-2.69	6.15	0.00328
TCZ W24 vs BL ONLY	CDK17	cyclin-dependent kinase 17	0.0806	13	0.848	-0.0711	11.4	0.634	-0.807	8.96	0.0097
TCZ W24 vs BL ONLY	CDK20	cyclin-dependent kinase 20	-0.646	1.54	0.181	-0.0143	1.18	0.984	0.697	1.68	0.0137
TCZ W24 vs BL ONLY	CDK6	cyclin-dependent kinase 6	0.394	7.7	0.579	-0.226	7.3	0.0604	-1.1	5.08	0.0293
TCZ W24 vs BL ONLY	CDKN1B	cyclin-dependent kinase inhibitor 1B (p27, Kip1)	-0.46	6.67	0.335	-0.00679	6.83	0.986	0.994	7.44	0.0158
TCZ W24 vs BL ONLY	CDKN2B	cyclin-dependent kinase inhibitor 2B (p15, inhibits CDK4)	1.29	12.9	0.0508	0.0957	31.2	0.328	-1.44	11.3	0.032
TCZ W24 vs BL ONLY	CDKN2C	cyclin-dependent kinase inhibitor 2C (p18, inhibits CDK4)	-0.886	4.61	0.269	0.201	5.92	0.262	1.04	4.19	0.0432
TCZ W24 vs BL ONLY	CDKN2D	cyclin-dependent kinase inhibitor 2D (p19, inhibits CDK4)	-0.821	2.16	0.0836	-0.0127	1.9	0.99	0.962	2.54	0.0248
TCZ W24 vs BL ONLY	CDO1	cysteine dioxygenase type 1	-0.972	0.987	0.0435	-0.00597	0.884	0.996	0.864	1.09	0.0354
TCZ W24 vs BL ONLY	CDPF1	cysteine-rich, DPF motif domain containing 1	0.0745	2.39	0.91	0.111	2.82	0.714	0.605	3.4	0.0356
TCZ W24 vs BL ONLY	CDR2	cerebellar degeneration-related protein 2, 62kDa	0.252	22.7	0.515	0.0453	29.8	0.741	-0.694	18.3	0.0105
TCZ W24 vs BL ONLY	CDR2L	cerebellar degeneration-related protein 2-like	0.551	24	0.217	0.0102	27.2	0.973	-1.06	15.3	0.014
TCZ W24 vs BL ONLY	CDV3	CDV3 homolog (mouse)	0.293	38.6	0.663	-0.039	40.9	0.725	-0.837	21.7	0.0331
TCZ W24 vs BL ONLY	CDYL	chromodomain protein, Y-like	0.222	8.28	0.68	-0.0605	9.69	0.626	-0.601	4.99	0.0241
TCZ W24 vs BL ONLY	CDYL2	chromodomain protein, Y-like 2	0.61	3.64	0.329	-0.0573	3.67	0.83	-1.36	1.92	0.0108
TCZ W24 vs BL ONLY	CEBPD	CCAAT/enhancer binding protein (C/EBP), delta	-0.49	21	0.655	0.109	28.9	0.479	1.48	28.3	0.00842
TCZ W24 vs BL ONLY	CEMP1	cementum protein 1	-0.335	0.78	0.626	0.198	0.747	0.765	0.991	1.24	0.0171
TCZ W24 vs BL ONLY	CENPQ	centromere protein Q	0.242	1.55	0.859	0.026	1.79	0.967	1.26	3	0.0278
TCZ W24 vs BL ONLY	CEP104	centrosomal protein 104kDa	0.495	4.96	0.119	-0.0153	5.63	0.944	-0.643	3.49	0.0339
TCZ W24 vs BL ONLY	CEP250	centrosomal protein 250kDa	-0.451	1.15	0.295	-0.00461	1.23	0.992	0.889	1.34	0.0203
TCZ W24 vs BL ONLY	CEP44	centrosomal protein 44kDa	-0.372	0.81	0.606	0.0522	0.787	0.899	0.97	1.67	0.0386
TCZ W24 vs BL ONLY	CEP57	centrosomal protein 57kDa	-0.782	5.49	0.12	0.0666	5.45	0.743	1.08	9.32	0.0197
TCZ W24 vs BL ONLY	CEP57L1	centrosomal protein 57kDa-like 1	-0.111	1.67	0.889	-0.111	1.64	0.769	0.755	2.35	0.0403
TCZ W24 vs BL ONLY	CEP70	centrosomal protein 70kDa	-0.575	1.03	0.44	0.197	0.499	0.505	0.837	1.67	0.0395
TCZ W24 vs BL ONLY	CERK	ceramide kinase	0.827	16.1	0.0851	0.0242	19	0.875	-1.26	9.07	0.0197
TCZ W24 vs BL ONLY	CH25H	cholesterol 25-hydroxylase	-0.73	19.4	0.759	-0.0338	58.3	0.893	1.29	4.49	0.0252
TCZ W24 vs BL ONLY	CHCHD7	coiled-coil-helix-coiled-coil-helix domain containing 7	0.162	4.3	0.841	0.0249	3.97	0.953	0.627	9.38	0.0433
TCZ W24 vs BL ONLY	CHEK2	checkpoint kinase 2	-0.521	1.44	0.371	-0.0728	1.13	0.87	0.94	2.06	0.0194
TCZ W24 vs BL ONLY	CHKB	choline kinase beta	-0.407	7.74	0.484	0.0665	4.92	0.75	0.723	12.7	0.0124
TCZ W24 vs BL ONLY	CHMP7	charged multivesicular body protein 7	0.342	13.9	0.336	-0.00252	14.6	0.993	-0.703	8.19	0.0347
TCZ W24 vs BL ONLY	CHORDC1	cysteine and histidine-rich domain (CHORD) containing 1	0.306	4.2	0.355	-0.046	3.57	0.877	-0.718	3.42	0.0175
TCZ W24 vs BL ONLY	CHST11	carbohydrate (chondroitin 4) sulfotransferase 11	1.63	8.78	0.0526	-0.0834	11.3	0.558	-2.38	4.14	0.00342
TCZ W24 vs BL ONLY	CHST3	carbohydrate (chondroitin 6) sulfotransferase 3	0.599	12.7	0.465	-0.0489	15	0.7	-1.83	6.92	0.00385
TCZ W24 vs BL ONLY	CHSY1	chondroitin sulfate synthase 1	0.6	14.8	0.301	-0.0582	19.2	0.618	-1.13	9.02	0.00504
TCZ W24 vs BL ONLY	CHUK	conserved helix-loop-helix ubiquitous kinase	0.432	8.37	0.0584	-0.174	7.98	0.0985	-0.742	7.88	0.00552
TCZ W24 vs BL ONLY	CIRBP	cold inducible RNA binding protein	0.124	24.9	0.757	0.0272	22.7	0.848	0.615	31.9	0.0124
TCZ W24 vs BL ONLY	CITED2	Cbp/p300-interacting transactivator, with Glu/Asp-rich carboxy-terminal domain, 2	-2.23	66.8	0.12	0.0418	61.9	0.822	2.05	46.3	0.0149
TCZ W24 vs BL ONLY	CITED4	Cbp/p300-interacting transactivator, with Glu/Asp-rich carboxy-terminal domain, 4	1.2	2.08	0.625	-0.0456	0.98	0.906	-2.86	2.45	0.00747
TCZ W24 vs BL ONLY	CLCF1	cardiotrophin-like cytokine factor 1	0.823	15.7	0.284	-0.0218	15.7	0.943	-1.88	6.96	0.00498
TCZ W24 vs BL ONLY	CLDN11	claudin 11	-0.722	57.4	0.452	-0.167	72.2	0.226	0.98	47.8	0.0163
TCZ W24 vs BL ONLY	CLGN	calmegin	0.981	0.822	0.23	-0.0228	0.831	0.974	0.704	1.59	0.0403
TCZ W24 vs BL ONLY	CLINT1	clathrin interactor 1	0.474	24.9	0.0899	-0.0181	27.5	0.899	-0.711	20.3	0.0136
TCZ W24 vs BL ONLY	CLK1	CDC-like kinase 1	-0.346	4.72	0.692	0.11	3.25	0.639	1.12	10.3	0.00457
TCZ W24 vs BL ONLY	CLK4	CDC-like kinase 4	-0.591	1.74	0.213	0.0836	1.59	0.824	0.911	3.24	0.00656
TCZ W24 vs BL ONLY	CLN8	ceroid-lipofuscinosis, neuronal 8 (epilepsy, progressive with mental retardation)	0.413	2.26	0.141	0.0462	2.5	0.811	-0.697	2.1	0.0121
TCZ W24 vs BL ONLY	CLPB	ClpB caseinolytic peptidase B homolog (E. coli)	0.581	3.56	0.0126	-0.0251	3.8	0.918	-0.623	3	0.019
TCZ W24 vs BL ONLY	CLUH	clustered mitochondria (cluA/CLU1) homolog	0.391	8.63	0.47	-0.0244	9.3	0.897	-0.755	6.64	0.047
TCZ W24 vs BL ONLY	CMIP	c-Maf inducing protein	0.452	9.47	0.516	-0.0332	12.2	0.827	-1	5	0.00524
TCZ W24 vs BL ONLY	CMPK1	cytidine monophosphate (UMP-CMP) kinase 1, cytosolic	0.503	42.8	0.0294	-0.0925	43.6	0.524	-0.643	30.9	0.0147
TCZ W24 vs BL ONLY	CMTM3	CKLF-like MARVEL transmembrane domain containing 3	0.0307	22.9	0.949	-0.0262	22	0.865	-0.739	15	0.0187
TCZ W24 vs BL ONLY	CMTM4	CKLF-like MARVEL transmembrane domain containing 4	0.639	2.79	0.36	-0.0505	3.82	0.8	-0.955	1.27	0.0191
TCZ W24 vs BL ONLY	CNIH2	cornichon family AMPA receptor auxiliary protein 2	1.56	0.908	0.181	0.0197	0.919	0.984	-1.39	1.14	0.00671
TCZ W24 vs BL ONLY	CNKSR3	CNKSR family member 3	-1.52	0.786	0.0225	0.107	0.63	0.867	2.21	1.46	0.00733
TCZ W24 vs BL ONLY	CNN2	calponin 2	0.797	215	0.0592	0.0665	253	0.467	-0.752	204	0.019
TCZ W24 vs BL ONLY	CNN3	calponin 3, acidic	0.821	262	0.0533	-0.0757	260	0.511	-0.777	351	0.0264
TCZ W24 vs BL ONLY	CNNM2	cyclin and CBS domain divalent metal cation transport mediator 2	0.53	1.33	0.622	0.0308	1.42	0.919	-1.03	1.42	0.0269
TCZ W24 vs BL ONLY	CNST	consortin, connexin sorting protein	0.603	7.05	0.334	-0.00613	12.6	0.983	-0.701	5.06	0.00982
TCZ W24 vs BL ONLY	COA5	cytochrome c oxidase assembly factor 5	-0.388	4.5	0.591	0.0168	3.72	0.968	1.01	9.26	0.0184
TCZ W24 vs BL ONLY	COL27A1	collagen, type XXVII, alpha 1	0.927	5.58	0.216	-0.022	5.05	0.894	-1.3	5.95	0.0468
TCZ W24 vs BL ONLY	COL4A1	collagen, type IV, alpha 1	0.873	135	0.214	0.103	112	0.329	-1.7	124	0.0126
TCZ W24 vs BL ONLY	COL4A2	collagen, type IV, alpha 2	0.333	149	0.675	0.126	117	0.215	-1.01	154	0.0327
TCZ W24 vs BL ONLY	COL5A1	collagen, type V, alpha 1	0.482	315	0.666	0.0727	720	0.428	-1.32	157	0.0208
TCZ W24 vs BL ONLY	COL5A3	collagen, type V, alpha 3	0.25	23.6	0.873	-0.101	41.9	0.429	-0.726	8.07	0.0449
TCZ W24 vs BL ONLY	COL7A1	collagen, type VII, alpha 1	1.04	8.67	0.199	-0.0352	7.43	0.853	-0.887	15.2	0.0243
TCZ W24 vs BL ONLY	COMMD3	COMM domain containing 3	-0.425	17.8	0.577	0.0745	17.5	0.67	0.94	39	0.0418
TCZ W24 vs BL ONLY	COMP	cartilage oligomeric matrix protein	0.986	95.4	0.425	0.168	145	0.122	-2.66	37.2	0.0203
TCZ W24 vs BL ONLY	CORO1C	coronin, actin binding protein, 1C	0.43	90.6	0.201	-0.037	89.6	0.755	-0.804	86.2	0.0053
TCZ W24 vs BL ONLY	CORO6	coronin 6	-0.282	0.735	0.785	0.257	0.482	0.492	1.22	2.07	0.00474
TCZ W24 vs BL ONLY	CPEB1		0.3	0.763	0.838	0.111	0.678	0.802	1.13	1.21	0.0191
TCZ W24 vs BL ONLY	CPEB2	cytoplasmic polyadenylation element binding protein 2	0.516	3.58	0.122	-0.0184	3.82	0.939	-0.677	3.21	0.0214
TCZ W24 vs BL ONLY	CPM	carboxypeptidase M	0.439	1.19	0.714	-0.115	1.19	0.647	0.806	1.35	0.0209
TCZ W24 vs BL ONLY	CPNE8	copine VIII	-0.518	0.874	0.441	0.0452	0.715	0.937	1.01	1.9	0.0129
TCZ W24 vs BL ONLY	CPSF6	cleavage and polyadenylation specific factor 6, 68kDa	0.323	6.74	0.357	0.0336	7.45	0.819	-0.589	5.23	0.048
TCZ W24 vs BL ONLY	CRBN	cereblon	-0.456	6.41	0.502	0.0478	6.05	0.815	0.935	14.1	0.0339
TCZ W24 vs BL ONLY	CREB3L1	cAMP responsive element binding protein 3-like 1	0.731	114	0.184	0.0509	136	0.644	-0.643	64.8	0.0223
TCZ W24 vs BL ONLY	CREBRF	CREB3 regulatory factor	-0.903	1.52	0.0619	-0.00435	1.37	0.993	1.48	1.68	0.00733
TCZ W24 vs BL ONLY	CRIM1	cysteine rich transmembrane BMP regulator 1 (chordin-like)	0.281	59.2	0.717	0.0831	69.6	0.467	-0.744	46.3	0.0365
TCZ W24 vs BL ONLY	CRLF1	cytokine receptor-like factor 1	1.13	19.9	0.137	0.0862	20.1	0.549	-1.34	18.9	0.00933
TCZ W24 vs BL ONLY	CROT	carnitine O-octanoyltransferase	-0.574	3.03	0.507	-0.00492	2.07	0.992	0.762	6.72	0.0109
TCZ W24 vs BL ONLY	CRYZL1	crystallin, zeta (quinone reductase)-like 1	-0.347	5.59	0.591	-0.051	4.68	0.875	0.852	11.5	0.0384
TCZ W24 vs BL ONLY	CSAD	cysteine sulfinic acid decarboxylase	-0.234	1.35	0.779	0.172	0.747	0.58	0.822	1.99	0.0137
TCZ W24 vs BL ONLY	CSDC2	cold shock domain containing C2, RNA binding	1.31	4.65	0.363	0.0901	5.08	0.638	-0.852	22.2	0.011
TCZ W24 vs BL ONLY	CSPG4	chondroitin sulfate proteoglycan 4	0.385	16.1	0.587	-0.0687	18.8	0.621	-1.11	11.1	0.0139
TCZ W24 vs BL ONLY	CSRNP2	cysteine-serine-rich nuclear protein 2	0.257	10.1	0.51	-0.0415	10	0.788	-0.648	8.02	0.0223
TCZ W24 vs BL ONLY	CSRP1	cysteine and glycine-rich protein 1	0.95	186	0.123	-0.0202	173	0.878	-1.13	204	0.00747
TCZ W24 vs BL ONLY	CSRP2	cysteine and glycine-rich protein 2	0.672	60.6	0.188	-0.0334	58.8	0.827	-1.22	39.6	0.00552
TCZ W24 vs BL ONLY	CSTF2T	cleavage stimulation factor, 3' pre-RNA, subunit 2, 64kDa, tau variant	0.426	7.98	0.224	-0.0824	9.4	0.5	-0.648	5.61	0.0321
TCZ W24 vs BL ONLY	CSTF3	cleavage stimulation factor, 3' pre-RNA, subunit 3, 77kDa	-0.484	4.81	0.0819	0.0134	4.08	0.961	0.653	6.05	0.0279
TCZ W24 vs BL ONLY	CTIF	CBP80/20-dependent translation initiation factor	0.654	17.8	0.107	0.0737	20.8	0.46	-1.16	14.2	0.018
TCZ W24 vs BL ONLY	CTNNB1	catenin (cadherin-associated protein), beta 1, 88kDa	0.558	81.5	0.0417	0.0235	93.7	0.851	-0.885	63.6	0.00733
TCZ W24 vs BL ONLY	CTNND1	catenin (cadherin-associated protein), delta 1	0.627	35.2	0.172	-0.0215	40.7	0.869	-0.674	27.2	0.0426
TCZ W24 vs BL ONLY	CTTNBP2NL	CTTNBP2 N-terminal like	0.293	10.8	0.525	-0.066	11.2	0.552	-0.733	8.53	0.0273
TCZ W24 vs BL ONLY	CTU1	cytosolic thiouridylase subunit 1	-0.131	2.58	0.798	0.129	2.97	0.69	-0.73	2.13	0.0384
TCZ W24 vs BL ONLY	CUTC	cutC copper transporter	-0.464	4.48	0.327	0.029	4.4	0.942	0.841	5.85	0.0196
TCZ W24 vs BL ONLY	CXCL1	chemokine (C-X-C motif) ligand 1 (melanoma growth stimulating activity, alpha)	-1.35	31.8	0.323	-0.244	13.2	0.18	0.706	58.4	0.0314
TCZ W24 vs BL ONLY	CXCL10	chemokine (C-X-C motif) ligand 10	-0.756	8.38	0.757	-0.247	6.72	0.649	1.3	13.3	0.00639
TCZ W24 vs BL ONLY	CXCL11	chemokine (C-X-C motif) ligand 11	0.14	2.95	0.956	-0.388	2.01	0.524	1.2	5.13	0.0243
TCZ W24 vs BL ONLY	CXCL2	chemokine (C-X-C motif) ligand 2	-2.5	0.707	0.00473	0.506	0.584	0.395	1.54	2.42	0.0175
TCZ W24 vs BL ONLY	CYP1B1	cytochrome P450, family 1, subfamily B, polypeptide 1	-1.27	13.6	0.108	0.176	18.3	0.502	0.977	11.1	0.0207
TCZ W24 vs BL ONLY	CYP2R1	cytochrome P450, family 2, subfamily R, polypeptide 1	0.32	0.597	0.743	0.037	0.594	0.956	1.13	1.23	0.0187
TCZ W24 vs BL ONLY	CYR61	cysteine-rich, angiogenic inducer, 61	0.742	578	0.226	-0.0312	683	0.791	-1.69	310	0.00315
TCZ W24 vs BL ONLY	D2HGDH	D-2-hydroxyglutarate dehydrogenase	-0.285	2.17	0.333	0.103	1.75	0.704	0.913	2.81	0.00969
TCZ W24 vs BL ONLY	DACT3	dishevelled-binding antagonist of beta-catenin 3	0.526	12.3	0.373	0.00256	17.8	0.995	-0.966	10.4	0.00944
TCZ W24 vs BL ONLY	DCAF4	DDB1 and CUL4 associated factor 4	0.22	3.9	0.417	-0.0003	3.95	0.999	-0.623	3.78	0.0237
TCZ W24 vs BL ONLY	DCLRE1C	DNA cross-link repair 1C	-0.216	0.972	0.743	-0.0551	0.96	0.868	0.652	1.5	0.03
TCZ W24 vs BL ONLY	DDAH1	dimethylarginine dimethylaminohydrolase 1	0.603	54.6	0.315	-0.0577	65	0.637	-1.53	42.2	0.004
TCZ W24 vs BL ONLY	DDI2	DNA-damage inducible 1 homolog 2 (S. cerevisiae)	0.671	4.99	0.0817	-0.0568	5.33	0.793	-1.34	3.27	0.0109
TCZ W24 vs BL ONLY	DDIT3	DNA-damage-inducible transcript 3	-0.444	7.3	0.673	-0.00573	7.3	0.991	1.68	20.7	0.00508
TCZ W24 vs BL ONLY	DDO	D-aspartate oxidase	-0.0618	0.12	0.985	0	0.0531	1	1.46	1.1	0.00733
TCZ W24 vs BL ONLY	DDX10	DEAD (Asp-Glu-Ala-Asp) box polypeptide 10	-0.0755	5.87	0.912	-0.096	6.09	0.566	-0.933	4.34	0.0164
TCZ W24 vs BL ONLY	DDX18	DEAD (Asp-Glu-Ala-Asp) box polypeptide 18	0.381	14.6	0.0511	-0.0479	14.6	0.748	-0.597	13.6	0.0203
TCZ W24 vs BL ONLY	DDX21	DEAD (Asp-Glu-Ala-Asp) box helicase 21	0.777	44.2	0.0962	-0.112	44.8	0.228	-1.61	28.6	0.00355
TCZ W24 vs BL ONLY	DDX31	DEAD (Asp-Glu-Ala-Asp) box polypeptide 31	0.456	3.21	0.131	0.0134	3.38	0.96	-0.859	2.19	0.0148
TCZ W24 vs BL ONLY	DDX56	DEAD (Asp-Glu-Ala-Asp) box helicase 56	0.436	17.8	0.084	-0.074	19.1	0.55	-0.605	14.2	0.024
TCZ W24 vs BL ONLY	DEGS1	delta(4)-desaturase, sphingolipid 1	0.509	66.7	0.0184	-0.0451	66.6	0.697	-0.801	59	0.00543
TCZ W24 vs BL ONLY	DGKI	diacylglycerol kinase, iota	1.34	2.18	0.0651	-0.00841	3.8	0.986	-1.39	1.12	0.00501
TCZ W24 vs BL ONLY	DHX33	DEAH (Asp-Glu-Ala-His) box polypeptide 33	0.667	4.86	0.139	-0.0689	5.56	0.611	-0.993	3.28	0.0236
TCZ W24 vs BL ONLY	DHX37	DEAH (Asp-Glu-Ala-His) box polypeptide 37	0.512	8.71	0.429	-0.0553	9.05	0.699	-1.18	4.87	0.0231
TCZ W24 vs BL ONLY	DHX58	DEXH (Asp-Glu-X-His) box polypeptide 58	-1.16	6.44	0.0652	-0.0189	5.87	0.975	1.07	7.3	0.00636
TCZ W24 vs BL ONLY	DIEXF	digestive organ expansion factor homolog (zebrafish)	0.602	6.99	0.205	-0.00115	7.45	0.998	-1.17	4.49	0.00642
TCZ W24 vs BL ONLY	DIP2B	DIP2 disco-interacting protein 2 homolog B (Drosophila)	0.992	6.06	0.0672	-0.0553	8.43	0.618	-1.01	3.71	0.0113
TCZ W24 vs BL ONLY	DIP2C	DIP2 disco-interacting protein 2 homolog C (Drosophila)	0.322	7.8	0.567	-0.0465	9.84	0.684	-0.673	4.66	0.0424
TCZ W24 vs BL ONLY	DIRAS1	DIRAS family, GTP-binding RAS-like 1	-0.191	8.28	0.83	0.0761	8.7	0.631	-0.635	5.92	0.028
TCZ W24 vs BL ONLY	DIXDC1	DIX domain containing 1	0.83	9.67	0.051	0.00855	9.66	0.964	-1.17	5.2	0.00636
TCZ W24 vs BL ONLY	DKC1	dyskeratosis congenita 1, dyskerin	0.484	12.8	0.113	-0.0118	13	0.949	-1.12	9.96	0.00404
TCZ W24 vs BL ONLY	DKK1	dickkopf WNT signaling pathway inhibitor 1	-0.187	131	0.917	0.0943	160	0.402	-1.06	41	0.0217
TCZ W24 vs BL ONLY	DLAT	dihydrolipoamide S-acetyltransferase	0.548	8.98	0.00735	-0.0179	9.35	0.921	-0.643	7.97	0.0104
TCZ W24 vs BL ONLY	DLC1	DLC1 Rho GTPase activating protein	0.688	38.5	0.275	-0.0445	42	0.676	-1.13	22.3	0.0234
TCZ W24 vs BL ONLY	DLG1	discs, large homolog 1 (Drosophila)	0.165	7.57	0.574	-0.00565	7.39	0.986	-0.633	6.4	0.0248
TCZ W24 vs BL ONLY	DLGAP4	discs, large (Drosophila) homolog-associated protein 4	0.0566	26.7	0.924	0.0506	26.6	0.664	-0.682	18.1	0.0269
TCZ W24 vs BL ONLY	DNAJA4	DnaJ (Hsp40) homolog, subfamily A, member 4	0.453	1.58	0.383	0.0493	1.64	0.884	-0.672	1.33	0.0267
TCZ W24 vs BL ONLY	DNAJB11	DnaJ (Hsp40) homolog, subfamily B, member 11	0.596	25.2	0.0858	0.0111	33.6	0.952	-0.664	20.8	0.0179
TCZ W24 vs BL ONLY	DNAJB4	DnaJ (Hsp40) homolog, subfamily B, member 4	0.472	24.3	0.201	-0.102	24.2	0.52	-0.966	21.6	0.00352
TCZ W24 vs BL ONLY	DNAJC1	DnaJ (Hsp40) homolog, subfamily C, member 1	0.329	13.2	0.356	-0.0464	17.3	0.771	-0.608	10.1	0.0125
TCZ W24 vs BL ONLY	DNAJC19	DnaJ (Hsp40) homolog, subfamily C, member 19	-0.336	2.73	0.63	0.0158	2.69	0.98	0.931	5.7	0.0375
TCZ W24 vs BL ONLY	DNAJC2	DnaJ (Hsp40) homolog, subfamily C, member 2	0.333	7.73	0.451	0.0372	7.47	0.882	-0.65	6.85	0.0291
TCZ W24 vs BL ONLY	DNAJC3	DnaJ (Hsp40) homolog, subfamily C, member 3	0.57	16.4	0.227	-0.112	23.4	0.232	-0.818	11.3	0.0136
TCZ W24 vs BL ONLY	DNALI1	dynein, axonemal, light intermediate chain 1	-1.37	1.43	0.12	-0.0797	0.44	0.891	1	1.9	0.00822
TCZ W24 vs BL ONLY	DNM1L	dynamin 1-like	0.405	16.4	0.0171	-0.0419	16.4	0.75	-0.717	14.4	0.00949
TCZ W24 vs BL ONLY	DNM2	dynamin 2	0.536	30.3	0.0586	0.0366	33.2	0.765	-0.679	24.1	0.0293
TCZ W24 vs BL ONLY	DOCK10	dedicator of cytokinesis 10	0.693	9.53	0.142	-0.0408	12	0.775	-1.44	6.22	0.00487
TCZ W24 vs BL ONLY	DOCK9	dedicator of cytokinesis 9	0.584	1.73	0.295	0.0471	2.18	0.832	-1.35	1.03	0.0106
TCZ W24 vs BL ONLY	DOHH	deoxyhypusine hydroxylase/monooxygenase	0.563	6.8	0.23	0.0559	8.09	0.819	-0.864	4.51	0.0206
TCZ W24 vs BL ONLY	DOK6	docking protein 6	1.73	1.67	0.0601	-0.104	3.6	0.502	-1.12	1.15	0.0246
TCZ W24 vs BL ONLY	DOPEY1	dopey family member 1	0.464	5.62	0.0121	-0.0683	6.19	0.595	-0.61	4.98	0.0129
TCZ W24 vs BL ONLY	DOPEY2	dopey family member 2	0.535	2.48	0.145	0.000838	2.78	0.998	-0.662	1.77	0.0328
TCZ W24 vs BL ONLY	DOT1L	DOT1-like histone H3K79 methyltransferase	0.481	5.09	0.504	0.044	5.3	0.765	-1.28	2.98	0.0148
TCZ W24 vs BL ONLY	DPH2	DPH2 homolog (S. cerevisiae)	0.394	9.46	0.177	-0.03	9.58	0.896	-0.71	7.66	0.0323
TCZ W24 vs BL ONLY	DPH5	diphthamide biosynthesis 5	-0.773	8.43	0.272	0.09	7.56	0.657	1.27	15.2	0.014
TCZ W24 vs BL ONLY	DPY19L1	dpy-19-like 1 (C. elegans)	0.238	9.87	0.518	-0.0569	10.9	0.688	-0.936	6.75	0.00992
TCZ W24 vs BL ONLY	DSE	dermatan sulfate epimerase	0.467	22.2	0.297	-0.0126	27.9	0.943	-0.712	14.6	0.0327
TCZ W24 vs BL ONLY	DSEL	dermatan sulfate epimerase-like	-0.542	10.1	0.0647	0.0489	9.38	0.785	0.672	11.1	0.031
TCZ W24 vs BL ONLY	DSP	desmoplakin	0.741	43.3	0.679	0.0136	60.4	0.933	-1.73	4.87	0.00751
TCZ W24 vs BL ONLY	DTWD1	DTW domain containing 1	-0.491	5	0.319	-0.0927	4.3	0.649	0.974	8.22	0.014
TCZ W24 vs BL ONLY	DUS4L	dihydrouridine synthase 4-like (S. cerevisiae)	-0.339	0.887	0.564	0.0994	0.863	0.848	1.12	1.46	0.0235
TCZ W24 vs BL ONLY	DUSP3	dual specificity phosphatase 3	1.11	19.4	0.0529	-0.115	19.5	0.223	-1.18	14.6	0.00681
TCZ W24 vs BL ONLY	DUSP5	dual specificity phosphatase 5	-0.505	5.28	0.714	-0.138	4.72	0.582	-1.41	4.78	0.0226
TCZ W24 vs BL ONLY	DUSP7	dual specificity phosphatase 7	0.0129	11	0.989	0.00112	12.8	0.998	-0.853	7.46	0.0184
TCZ W24 vs BL ONLY	DYNC2LI1	dynein, cytoplasmic 2, light intermediate chain 1	-0.748	2.97	0.107	0.115	2.66	0.665	0.724	5.72	0.0376
TCZ W24 vs BL ONLY	DYRK1B	dual-specificity tyrosine-(Y)-phosphorylation regulated kinase 1B	-0.661	2.46	0.158	0.231	2.77	0.105	0.831	2.81	0.011
TCZ W24 vs BL ONLY	DYRK2	dual-specificity tyrosine-(Y)-phosphorylation regulated kinase 2	0.492	13.3	0.413	-0.0737	16.1	0.526	-1.83	7.21	0.00733
TCZ W24 vs BL ONLY	DZIP1L	DAZ interacting zinc finger protein 1-like	0.307	1.88	0.479	0.0686	2.15	0.734	-0.647	1.74	0.0264
TCZ W24 vs BL ONLY	DZIP3	DAZ interacting zinc finger protein 3	-0.532	1.47	0.0773	0.00594	1.4	0.991	0.639	1.95	0.0384
TCZ W24 vs BL ONLY	E2F3	E2F transcription factor 3	0.238	5.61	0.363	-0.0717	5.61	0.587	-0.654	4.81	0.035
TCZ W24 vs BL ONLY	EAF1	ELL associated factor 1	0.32	7.55	0.26	-0.0978	6.79	0.401	-0.832	6.79	0.00669
TCZ W24 vs BL ONLY	EAPP	E2F-associated phosphoprotein	-0.47	14.2	0.544	0.0503	12	0.797	1.39	30.1	0.0138
TCZ W24 vs BL ONLY	EBPL	emopamil binding protein-like	-0.47	7.52	0.36	-0.0289	5.46	0.939	0.908	12.1	0.0251
TCZ W24 vs BL ONLY	EDEM1	ER degradation enhancer, mannosidase alpha-like 1	0.573	10.4	0.194	-0.0518	13.2	0.676	-0.737	7.27	0.0187
TCZ W24 vs BL ONLY	EFCAB7	EF-hand calcium binding domain 7	-0.99	0.466	0.208	0.17	0.446	0.765	1.73	1.35	0.0152
TCZ W24 vs BL ONLY	EFHC1	EF-hand domain (C-terminal) containing 1	-0.674	1.4	0.115	0.0584	1.1	0.826	0.668	2.15	0.0128
TCZ W24 vs BL ONLY	EFR3A	EFR3 homolog A (S. cerevisiae)	0.439	36.2	0.204	-0.0509	44.8	0.717	-0.845	28.9	0.0129
TCZ W24 vs BL ONLY	EGFL8	EGF-like-domain, multiple 8	-0.47	2.67	0.119	0.0224	2.38	0.976	0.685	3.4	0.0288
TCZ W24 vs BL ONLY	EGR2	early growth response 2	1.21	30.2	0.103	-0.231	38.4	0.122	-3.97	18.8	0.0101
TCZ W24 vs BL ONLY	EHD1	EH-domain containing 1	-0.194	42.6	0.85	-0.0198	21.2	0.909	-0.901	22.6	0.0279
TCZ W24 vs BL ONLY	EHMT2		-0.627	5.26	0.0692	0.112	5.38	0.418	0.847	5.71	0.0193
TCZ W24 vs BL ONLY	EIF1AD	eukaryotic translation initiation factor 1A domain containing	0.407	7.36	0.194	-0.021	7.42	0.918	-0.853	5.76	0.00939
TCZ W24 vs BL ONLY	EIF1B	eukaryotic translation initiation factor 1B	-0.547	29	0.114	0.0217	24.1	0.916	0.634	44	0.0446
TCZ W24 vs BL ONLY	EIF2S1	eukaryotic translation initiation factor 2, subunit 1 alpha, 35kDa	0.318	24.9	0.142	-0.0819	24.5	0.491	-0.594	24.7	0.0254
TCZ W24 vs BL ONLY	EIF3B	eukaryotic translation initiation factor 3, subunit B	0.424	63.1	0.406	-0.0436	70.4	0.706	-0.708	38.6	0.0361
TCZ W24 vs BL ONLY	EIF4A1	eukaryotic translation initiation factor 4A1	0.329	123	0.208	-0.053	119	0.626	-0.636	142	0.0199
TCZ W24 vs BL ONLY	EIF4EBP3	eukaryotic translation initiation factor 4E binding protein 3	-0.602	5.3	0.184	0.0893	5.13	0.828	0.692	5.07	0.0379
TCZ W24 vs BL ONLY	EIF4G1	eukaryotic translation initiation factor 4 gamma, 1	0.361	101	0.469	-0.0164	104	0.897	-0.704	59.4	0.0388
TCZ W24 vs BL ONLY	ELAC1	elaC ribonuclease Z 1	-0.0886	2.35	0.916	-0.0693	2.34	0.83	0.987	4.41	0.0351
TCZ W24 vs BL ONLY	ELF4	E74-like factor 4 (ets domain transcription factor)	-0.0845	12.1	0.91	0.0526	12.9	0.639	-0.691	7.9	0.0481
TCZ W24 vs BL ONLY	ELK3	ELK3, ETS-domain protein (SRF accessory protein 2)	-0.0715	32.7	0.877	-0.0813	31.9	0.458	-0.705	21.9	0.0397
TCZ W24 vs BL ONLY	ELOVL6	ELOVL fatty acid elongase 6	-0.885	3.17	0.0901	0.0669	1.94	0.813	0.92	4.84	0.0449
TCZ W24 vs BL ONLY	EMC9	ER membrane protein complex subunit 9	-0.181	5.86	0.771	0.104	5.75	0.697	0.691	11.3	0.0468
TCZ W24 vs BL ONLY	EML1	echinoderm microtubule associated protein like 1	0.963	11.4	0.0898	-0.0484	11.7	0.787	-0.898	11.6	0.00935
TCZ W24 vs BL ONLY	ENC1	ectodermal-neural cortex 1 (with BTB domain)	1.33	45.8	0.189	-0.0304	46.8	0.856	-2.69	26.9	0.00458
TCZ W24 vs BL ONLY	ENDOD1	endonuclease domain containing 1	0.536	12.4	0.263	-0.068	11.7	0.577	-0.742	11.5	0.0113
TCZ W24 vs BL ONLY	ENPP1	ectonucleotide pyrophosphatase/phosphodiesterase 1	0.287	9.79	0.686	-0.27	13.4	0.0764	-0.885	5.92	0.0098
TCZ W24 vs BL ONLY	ENTPD7	ectonucleoside triphosphate diphosphohydrolase 7	0.646	6.02	0.448	-0.0968	6.13	0.38	-1.38	3.17	0.00533
TCZ W24 vs BL ONLY	EPHA2	EPH receptor A2	0.239	10.8	0.847	0.0211	11.4	0.927	-1.21	7.22	0.0362
TCZ W24 vs BL ONLY	EPHB2	EPH receptor B2	0.824	6.17	0.452	0.0275	6.18	0.877	-1.08	6.76	0.0232
TCZ W24 vs BL ONLY	EPHB3	EPH receptor B3	0.403	4.62	0.648	0.213	10.2	0.0879	-0.943	2.94	0.0141
TCZ W24 vs BL ONLY	EPOR	erythropoietin receptor	-0.201	0.514	0.893	0.219	0.462	0.674	0.801	1.51	0.0268
TCZ W24 vs BL ONLY	EPSTI1	epithelial stromal interaction 1 (breast)	-1.23	11.3	0.288	-0.213	9.31	0.4	0.778	13.5	0.0226
TCZ W24 vs BL ONLY	EPT1	ethanolaminephosphotransferase 1 (CDP-ethanolamine-specific)	0.493	4.96	0.189	-0.163	5.5	0.193	-0.926	3.71	0.00671
TCZ W24 vs BL ONLY	ERBB2IP	erbb2 interacting protein	0.0856	16.9	0.902	-0.0549	18	0.668	-0.643	12	0.022
TCZ W24 vs BL ONLY	ERMARD	ER membrane-associated RNA degradation	-0.291	2.69	0.375	0.00901	2.54	0.988	0.711	3.37	0.022
TCZ W24 vs BL ONLY	ERRFI1	ERBB receptor feedback inhibitor 1	-0.304	26.2	0.869	-0.196	10.4	0.193	-1.18	20.7	0.0247
TCZ W24 vs BL ONLY	ESM1	endothelial cell-specific molecule 1	1.53	4.23	0.541	-0.226	3.61	0.193	-5.07	2.38	0.0148
TCZ W24 vs BL ONLY	ETF1	eukaryotic translation termination factor 1	0.388	24.7	0.16	-0.0458	24.4	0.689	-0.652	21.4	0.0106
TCZ W24 vs BL ONLY	ETS1	v-ets avian erythroblastosis virus E26 oncogene homolog 1	0.652	19.5	0.382	-0.023	22.9	0.869	-0.837	10.2	0.0191
TCZ W24 vs BL ONLY	ETV3	ets variant 3	0.805	5.57	0.17	-0.178	8.53	0.193	-1.17	3.86	0.00611
TCZ W24 vs BL ONLY	ETV6	ets variant 6	0.713	6	0.15	-0.0153	7.76	0.933	-1.12	5.28	0.0388
TCZ W24 vs BL ONLY	EVA1A	eva-1 homolog A (C. elegans)	-0.523	41.6	0.407	-0.0961	35.8	0.429	-1.07	27.6	0.0154
TCZ W24 vs BL ONLY	EXOC8	exocyst complex component 8	0.359	3.6	0.364	-0.0847	3.62	0.582	-0.714	2.12	0.0258
TCZ W24 vs BL ONLY	EYA2	EYA transcriptional coactivator and phosphatase 2	0.873	2.1	0.318	0.0491	2.33	0.872	-1.46	1.87	0.00405
TCZ W24 vs BL ONLY	EYA4	EYA transcriptional coactivator and phosphatase 4	1.84	0.0301	0.614	0.104	0.0308	0.894	1.43	1.28	0.00636
TCZ W24 vs BL ONLY	EZH1	enhancer of zeste 1 polycomb repressive complex 2 subunit	-0.466	2.81	0.337	0.0623	3.29	0.733	1.09	3.07	0.00414
TCZ W24 vs BL ONLY	F2RL2	coagulation factor II (thrombin) receptor-like 2	0.637	1.17	0.835	-0.0509	0.731	0.875	0.718	18	0.0247
TCZ W24 vs BL ONLY	F3	coagulation factor III (thromboplastin, tissue factor)	1.93	45.5	0.0825	0.071	40	0.51	-1.43	74.3	0.00324
TCZ W24 vs BL ONLY	FAM107B	family with sequence similarity 107, member B	0.843	4.42	0.57	-0.107	3.49	0.433	-1.08	9.35	0.0218
TCZ W24 vs BL ONLY	FAM131B	family with sequence similarity 131, member B	0.237	5.12	0.768	0.013	4.35	0.965	-0.711	4.22	0.0258
TCZ W24 vs BL ONLY	FAM162B	family with sequence similarity 162, member B	2.4	0.0318	0.575	0	0.0269	1	1.17	4.35	0.0191
TCZ W24 vs BL ONLY	FAM171B	family with sequence similarity 171, member B	-0.717	3.57	0.251	0.0327	3.16	0.908	0.637	3.97	0.0499
TCZ W24 vs BL ONLY	FAM175A	family with sequence similarity 175, member A	-0.886	3.59	0.131	0.0957	3.33	0.672	1.12	7.72	0.0141
TCZ W24 vs BL ONLY	FAM178A	family with sequence similarity 178, member A	-0.525	2.48	0.105	0.0359	2.37	0.869	0.661	3.31	0.0224
TCZ W24 vs BL ONLY	FAM196B	family with sequence similarity 196, member B	-0.801	10.3	0.332	-0.183	10.4	0.216	-1.16	4.69	0.0372
TCZ W24 vs BL ONLY	FAM199X	family with sequence similarity 199, X-linked	0.36	3.08	0.305	-0.053	3.08	0.824	-0.593	2.9	0.0416
TCZ W24 vs BL ONLY	FAM210A	family with sequence similarity 210, member A	0.47	3.53	0.0665	-0.094	3.42	0.555	-0.7	3.85	0.0191
TCZ W24 vs BL ONLY	FAM217B	family with sequence similarity 217, member B	-0.698	0.855	0.23	0.0969	0.824	0.728	0.856	1.35	0.0243
TCZ W24 vs BL ONLY	FAM43A	family with sequence similarity 43, member A	-0.73	4.16	0.154	0.185	4.12	0.32	1.29	4.62	0.00308
TCZ W24 vs BL ONLY	FAM47E-STBD1	FAM47E-STBD1 readthrough	0.756	3.38	0.105	0.0111	3.27	0.975	-1.23	2.86	0.00237
TCZ W24 vs BL ONLY	FAM57A	family with sequence similarity 57, member A	0.482	27.3	0.181	-0.0377	25.4	0.786	-1.16	18.5	0.00634
TCZ W24 vs BL ONLY	FAM60A	family with sequence similarity 60, member A	1.05	1.18	0.137	-0.0493	1.1	0.902	-0.954	1.39	0.00564
TCZ W24 vs BL ONLY	FAM63A	family with sequence similarity 63, member A	-0.729	1.61	0.207	0.104	1.58	0.745	1.25	1.98	0.00678
TCZ W24 vs BL ONLY	FAM83G	family with sequence similarity 83, member G	1.11	14	0.156	-0.194	13.7	0.0929	-2.56	6.15	0.00325
TCZ W24 vs BL ONLY	FAM91A1	family with sequence similarity 91, member A1	0.447	7.66	0.145	-0.0819	7.93	0.587	-0.637	5.88	0.0248
TCZ W24 vs BL ONLY	FAM92A1	family with sequence similarity 92, member A1	-0.231	4.32	0.704	0.0286	3.64	0.933	1.04	7.18	0.0153
TCZ W24 vs BL ONLY	FAM98A	family with sequence similarity 98, member A	0.554	37.6	0.0209	-0.0202	39.6	0.889	-1.05	32	0.00813
TCZ W24 vs BL ONLY	FANCG	Fanconi anemia, complementation group G	-0.404	3.07	0.537	-0.0368	3.73	0.921	0.742	2.8	0.0496
TCZ W24 vs BL ONLY	FASN	fatty acid synthase	0.0673	32.3	0.952	0.0109	40	0.96	-0.792	16	0.027
TCZ W24 vs BL ONLY	FBLIM1	filamin binding LIM protein 1	0.637	25.5	0.165	0.033	24.8	0.841	-0.816	25.8	0.0259
TCZ W24 vs BL ONLY	FBLN5	fibulin 5	0.808	204	0.0919	0.0773	233	0.334	-1.13	157	0.0136
TCZ W24 vs BL ONLY	FBXL14	F-box and leucine-rich repeat protein 14	-0.949	2.34	0.0516	-0.256	1.98	0.229	0.675	1.63	0.0183
TCZ W24 vs BL ONLY	FBXL20	F-box and leucine-rich repeat protein 20	-0.186	1.05	0.758	0.0788	1.18	0.657	0.676	1.01	0.0262
TCZ W24 vs BL ONLY	FBXL8	F-box and leucine-rich repeat protein 8	-0.219	2.27	0.645	0.0602	2.26	0.875	0.81	3.07	0.00636
TCZ W24 vs BL ONLY	FBXO36	F-box protein 36	-0.286	0.839	0.4	-0.122	0.827	0.758	0.848	1.05	0.024
TCZ W24 vs BL ONLY	FBXO4	F-box protein 4	-0.244	2.3	0.742	0.00125	2.38	0.998	0.864	3.87	0.0324
TCZ W24 vs BL ONLY	FBXO44	F-box protein 44	-0.461	2.96	0.38	0.139	1.59	0.549	0.643	4	0.0101
TCZ W24 vs BL ONLY	FBXO45	F-box protein 45	0.393	2.54	0.534	-0.0294	3.5	0.882	-0.89	1.44	0.0206
TCZ W24 vs BL ONLY	FBXO6	F-box protein 6	-0.397	4.55	0.391	0.0474	4.24	0.884	0.639	6.5	0.0356
TCZ W24 vs BL ONLY	FEM1A	fem-1 homolog a (C. elegans)	0.164	7.29	0.759	0.0439	7.45	0.77	-0.71	3.99	0.0162
TCZ W24 vs BL ONLY	FEM1B	fem-1 homolog b (C. elegans)	0.108	11	0.77	-0.0783	10.8	0.537	-0.624	9.7	0.0144
TCZ W24 vs BL ONLY	FGF1	fibroblast growth factor 1 (acidic)	0.655	3.88	0.246	-0.26	3.2	0.0843	-1.65	3.12	0.00279
TCZ W24 vs BL ONLY	FGF18	fibroblast growth factor 18	2.52	3.17	0.199	-0.233	2.8	0.382	-2.43	2.07	0.00324
TCZ W24 vs BL ONLY	FGF2	fibroblast growth factor 2 (basic)	1.19	85.3	0.243	-0.0805	89.6	0.577	-2.19	36.6	0.00459
TCZ W24 vs BL ONLY	FGFRL1	fibroblast growth factor receptor-like 1	0.0384	21.4	0.962	0.14	24.6	0.229	-0.884	15.3	0.0134
TCZ W24 vs BL ONLY	FHL2	four and a half LIM domains 2	0.515	108	0.117	-0.0446	98.8	0.725	-1.06	91.3	0.00343
TCZ W24 vs BL ONLY	FHL3	four and a half LIM domains 3	0.681	63.4	0.105	-0.05	68	0.704	-1.22	55.1	0.00557
TCZ W24 vs BL ONLY	FIBCD1	fibrinogen C domain containing 1	2.43	6.63	0.137	-0.000326	5.54	0.999	-1.34	12.8	0.00254
TCZ W24 vs BL ONLY	FIBIN	fin bud initiation factor homolog (zebrafish)	-0.36	8.82	0.713	-0.0944	9.55	0.467	1.28	6.16	0.00254
TCZ W24 vs BL ONLY	FICD	FIC domain containing	0.996	4.99	0.064	-0.067	5.73	0.775	-1.14	2.96	0.0187
TCZ W24 vs BL ONLY	FILIP1L	filamin A interacting protein 1-like	1.13	28.3	0.166	-0.0454	29.9	0.745	-1.7	18.8	0.00414
TCZ W24 vs BL ONLY	FJX1	four jointed box 1 (Drosophila)	0.748	12	0.075	-0.0467	15.1	0.782	-1.79	8.01	0.0104
TCZ W24 vs BL ONLY	FKBPL		-0.557	2.61	0.12	-0.218	2.33	0.491	0.863	3.25	0.0366
TCZ W24 vs BL ONLY	FLNB	filamin B, beta	0.83	35.8	0.221	0.0282	45.6	0.841	-1.45	22.7	0.0281
TCZ W24 vs BL ONLY	FLNC	filamin C, gamma	1.18	151	0.136	-0.0169	179	0.918	-1.55	64.5	0.00802
TCZ W24 vs BL ONLY	FMNL2	formin-like 2	0.141	5.62	0.867	-0.0731	4.67	0.58	-1.03	5.05	0.0315
TCZ W24 vs BL ONLY	FMNL3	formin-like 3	0.368	9.83	0.516	-0.125	10.1	0.147	-1.14	5.79	0.0322
TCZ W24 vs BL ONLY	FMO2	flavin containing monooxygenase 2 (non-functional)	0.666	0.0186	0.899	0	0.0167	1	2.07	1.63	0.00352
TCZ W24 vs BL ONLY	FNDC1	fibronectin type III domain containing 1	1.02	5.24	0.733	0.0602	24	0.74	-0.868	1.3	0.0432
TCZ W24 vs BL ONLY	FNDC3A	fibronectin type III domain containing 3A	0.58	18.2	0.0329	-0.135	18.2	0.223	-1.01	13	0.00417
TCZ W24 vs BL ONLY	FNDC3B	fibronectin type III domain containing 3B	0.598	38.8	0.202	-0.0444	45.7	0.684	-0.946	28.3	0.0236
TCZ W24 vs BL ONLY	FOPNL	FGFR1OP N-terminal like	-0.307	10.8	0.526	-0.0322	9.22	0.882	0.732	19.3	0.0366
TCZ W24 vs BL ONLY	FOXC2	forkhead box C2 (MFH-1, mesenchyme forkhead 1)	0.191	3.54	0.935	0.134	2.67	0.615	-2.48	3.5	0.00417
TCZ W24 vs BL ONLY	FOXK2	forkhead box K2	0.0778	12	0.905	-0.00388	12.9	0.99	-0.595	7.11	0.0289
TCZ W24 vs BL ONLY	FOXO3	forkhead box O3	0.82	3.12	0.288	-0.0681	4.07	0.626	-1.19	1.45	0.0148
TCZ W24 vs BL ONLY	FOXP4	forkhead box P4	0.277	8.64	0.77	0.107	8.02	0.527	-1.3	5.91	0.0126
TCZ W24 vs BL ONLY	FRMD8	FERM domain containing 8	0.155	12.8	0.799	0.0111	12.4	0.96	-1.04	10.4	0.0216
TCZ W24 vs BL ONLY	FRRS1	ferric-chelate reductase 1	-0.169	1.62	0.742	0.0529	1.65	0.895	0.653	1.76	0.048
TCZ W24 vs BL ONLY	FSCN1	fascin actin-bundling protein 1	-0.0521	132	0.929	0.0921	127	0.429	-0.821	84.1	0.0291
TCZ W24 vs BL ONLY	FSIP1	fibrous sheath interacting protein 1	0.0854	60.8	0.946	-0.0304	86.8	0.847	-1.07	29.1	0.0186
TCZ W24 vs BL ONLY	FST	follistatin	-0.593	46.7	0.654	-0.0264	21.2	0.895	-0.97	49.7	0.0261
TCZ W24 vs BL ONLY	FSTL1	follistatin-like 1	0.242	829	0.779	-0.000239	1020	0.999	-0.624	506	0.0475
TCZ W24 vs BL ONLY	FTSJ1	FtsJ RNA methyltransferase homolog 1 (E. coli)	0.233	24.2	0.457	-0.0252	23.6	0.882	-0.791	19.9	0.0129
TCZ W24 vs BL ONLY	FUBP1	far upstream element (FUSE) binding protein 1	0.324	16.6	0.224	0.0211	17.6	0.912	-0.595	14.5	0.0128
TCZ W24 vs BL ONLY	FUBP3	far upstream element (FUSE) binding protein 3	0.434	14.8	0.176	-0.0144	14.8	0.938	-0.661	10.3	0.0306
TCZ W24 vs BL ONLY	FURIN	furin (paired basic amino acid cleaving enzyme)	0.905	56	0.0906	-0.0307	65.5	0.819	-1.27	31	0.00409
TCZ W24 vs BL ONLY	FUT4	fucosyltransferase 4 (alpha (1,3) fucosyltransferase, myeloid-specific)	0.785	3.78	0.121	-0.0662	4.63	0.672	-1.39	2.05	0.0155
TCZ W24 vs BL ONLY	FZD8	frizzled class receptor 8	0.588	24.9	0.443	-0.173	32.7	0.226	-3.43	13.8	0.00774
TCZ W24 vs BL ONLY	G3BP1	GTPase activating protein (SH3 domain) binding protein 1	0.221	19.3	0.503	-0.136	19.4	0.115	-0.673	13.2	0.0135
TCZ W24 vs BL ONLY	GABARAPL1	GABA(A) receptor-associated protein like 1	1.1	28.2	0.183	0.0695	28.6	0.566	-0.965	38.2	0.00877
TCZ W24 vs BL ONLY	GABBR1	gamma-aminobutyric acid (GABA) B receptor, 1	-0.342	2.02	0.598	-0.0825	1.19	0.769	0.665	2.45	0.0368
TCZ W24 vs BL ONLY	GABBR2	gamma-aminobutyric acid (GABA) B receptor, 2	0.938	1.56	0.412	-0.0801	1.53	0.697	-1.26	1.2	0.0137
TCZ W24 vs BL ONLY	GADD45A	growth arrest and DNA-damage-inducible, alpha	0.577	32.2	0.25	-0.0171	26.6	0.927	-0.627	31.9	0.0237
TCZ W24 vs BL ONLY	GAL	galanin/GMAP prepropeptide	1.99	4.59	0.287	-0.0652	7.36	0.855	-2.1	12	0.00338
TCZ W24 vs BL ONLY	GALM	galactose mutarotase (aldose 1-epimerase)	-0.739	2.56	0.159	0.152	1.72	0.528	0.805	2.96	0.0112
TCZ W24 vs BL ONLY	GALNT1	polypeptide N-acetylgalactosaminyltransferase 1	0.698	18.5	0.091	-0.0129	23.9	0.947	-0.68	17.5	0.0132
TCZ W24 vs BL ONLY	GALNT16	polypeptide N-acetylgalactosaminyltransferase 16	1.43	1.98	0.177	-0.147	1.97	0.4	-2.18	1.43	0.00324
TCZ W24 vs BL ONLY	GAR1	GAR1 ribonucleoprotein	0.438	8.43	0.369	-0.0219	9.49	0.938	-0.853	5.39	0.0181
TCZ W24 vs BL ONLY	GAS1	growth arrest-specific 1	-1.63	18.7	0.406	-0.0217	18.6	0.917	1.9	4.7	0.00308
TCZ W24 vs BL ONLY	GAS7	growth arrest-specific 7	-0.373	8.85	0.824	-0.135	17.2	0.256	-1.42	1.91	0.035
TCZ W24 vs BL ONLY	GATA6	GATA binding protein 6	-0.0638	5.3	0.945	-0.0263	6.02	0.896	-1.03	3.81	0.0434
TCZ W24 vs BL ONLY	GATAD2A	GATA zinc finger domain containing 2A	0.00787	14.5	0.992	-0.0129	14.5	0.939	-0.794	9.74	0.0337
TCZ W24 vs BL ONLY	GBP3	guanylate binding protein 3	1.48	8.16	0.134	-0.154	6.89	0.331	0.654	20	0.0231
TCZ W24 vs BL ONLY	GBP4	guanylate binding protein 4	-0.489	1.08	0.82	-0.271	1.04	0.358	0.826	1.09	0.019
TCZ W24 vs BL ONLY	GCH1	GTP cyclohydrolase 1	-0.734	1.54	0.469	-0.152	1.61	0.599	0.834	2.26	0.0461
TCZ W24 vs BL ONLY	GDF5	growth differentiation factor 5	-1.07	2.06	0.346	-0.11	0.557	0.797	1.76	3.07	0.0113
TCZ W24 vs BL ONLY	GDNF	glial cell derived neurotrophic factor	-0.00189	2.5	0.999	-0.053	2.73	0.813	-1.5	1.28	0.0231
TCZ W24 vs BL ONLY	GDPD3	glycerophosphodiester phosphodiesterase domain containing 3	0.0872	0.448	0.949	-0.17	0.304	0.841	1.13	1.16	0.0175
TCZ W24 vs BL ONLY	GEM	GTP binding protein overexpressed in skeletal muscle	0.967	16.4	0.206	-0.147	15.1	0.257	-0.985	22.1	0.0126
TCZ W24 vs BL ONLY	GEMIN5	gem (nuclear organelle) associated protein 5	0.397	6.75	0.395	-0.0586	7.27	0.632	-1.09	3.75	0.0106
TCZ W24 vs BL ONLY	GEMIN8	gem (nuclear organelle) associated protein 8	-0.219	1.38	0.6	0.0441	1.41	0.869	0.62	1.78	0.0421
TCZ W24 vs BL ONLY	GFM1	G elongation factor, mitochondrial 1	0.547	12	0.0253	-0.0703	13.4	0.572	-0.752	10.8	0.00663
TCZ W24 vs BL ONLY	GFPT2	glutamine-fructose-6-phosphate transaminase 2	0.486	69.6	0.443	-0.219	72.2	0.0985	-2.06	35.4	0.00681
TCZ W24 vs BL ONLY	GIGYF1	GRB10 interacting GYF protein 1	-0.322	3.93	0.442	0.0843	3.79	0.538	0.792	4.59	0.0099
TCZ W24 vs BL ONLY	GJA1	gap junction protein, alpha 1, 43kDa	-0.0558	48	0.965	-0.224	26.6	0.0617	-0.749	62.7	0.0307
TCZ W24 vs BL ONLY	GLI2	GLI family zinc finger 2	0.468	7.44	0.635	0.185	7.63	0.196	-1.74	4.36	0.0134
TCZ W24 vs BL ONLY	GLI4	GLI family zinc finger 4	-0.0405	3.09	0.946	-0.0687	2.86	0.868	0.687	4.16	0.0166
TCZ W24 vs BL ONLY	GLIS2	GLIS family zinc finger 2	-0.583	18.3	0.406	-0.0157	21.2	0.929	-0.904	10.5	0.0152
TCZ W24 vs BL ONLY	GLMN	glomulin, FKBP associated protein	-0.101	2.29	0.899	-0.00702	2.1	0.993	0.889	4.61	0.0324
TCZ W24 vs BL ONLY	GLRX	glutaredoxin (thioltransferase)	-0.687	12.7	0.292	0.043	6.61	0.845	1.24	23.2	0.0142
TCZ W24 vs BL ONLY	GLS	glutaminase	0.899	60.1	0.0858	0.0478	63.8	0.824	-1.94	46.1	0.00331
TCZ W24 vs BL ONLY	GMPR	guanosine monophosphate reductase	-0.995	6.22	0.262	-0.131	6.59	0.703	0.71	6.63	0.0279
TCZ W24 vs BL ONLY	GMPR2	guanosine monophosphate reductase 2	-0.535	11.9	0.176	0.0336	10.6	0.846	0.644	17.7	0.0331
TCZ W24 vs BL ONLY	GNA13	guanine nucleotide binding protein (G protein), alpha 13	0.386	9.9	0.508	-0.0253	12.1	0.884	-0.639	7.43	0.0408
TCZ W24 vs BL ONLY	GNAI1	guanine nucleotide binding protein (G protein), alpha inhibiting activity polypeptide 1	-0.573	3.55	0.0478	-0.072	3.51	0.769	0.885	3.82	0.0148
TCZ W24 vs BL ONLY	GNB3	guanine nucleotide binding protein (G protein), beta polypeptide 3	-0.218	1.03	0.866	-0.0495	0.663	0.944	0.799	1.36	0.0394
TCZ W24 vs BL ONLY	GNB4	guanine nucleotide binding protein (G protein), beta polypeptide 4	0.454	15.1	0.207	-0.0334	19	0.873	-0.828	12.2	0.013
TCZ W24 vs BL ONLY	GNG12	guanine nucleotide binding protein (G protein), gamma 12	0.15	73	0.559	-0.0972	72.7	0.316	-0.713	59	0.0132
TCZ W24 vs BL ONLY	GNL2	guanine nucleotide binding protein-like 2 (nucleolar)	0.277	22	0.349	-0.0235	22.1	0.895	-0.774	17.7	0.0102
TCZ W24 vs BL ONLY	GNL3	guanine nucleotide binding protein-like 3 (nucleolar)	0.391	30.1	0.206	-0.0235	28.1	0.874	-0.655	29	0.0147
TCZ W24 vs BL ONLY	GNL3L	guanine nucleotide binding protein-like 3 (nucleolar)-like	0.436	3.2	0.0974	-0.0603	3.39	0.699	-0.722	2.67	0.0197
TCZ W24 vs BL ONLY	GNPDA1	glucosamine-6-phosphate deaminase 1	-0.221	8.03	0.723	-0.0249	6.6	0.906	0.613	12.8	0.0356
TCZ W24 vs BL ONLY	GNPDA2	glucosamine-6-phosphate deaminase 2	-0.131	2.74	0.837	0.0148	2.63	0.955	0.742	4.71	0.0311
TCZ W24 vs BL ONLY	GNPNAT1	glucosamine-phosphate N-acetyltransferase 1	0.173	22	0.632	-0.0682	19.3	0.566	-0.968	18.9	0.00822
TCZ W24 vs BL ONLY	GPAM	glycerol-3-phosphate acyltransferase, mitochondrial	1.84	4.27	0.0596	-0.0234	14.7	0.897	-0.892	2.88	0.0232
TCZ W24 vs BL ONLY	GPATCH4	G patch domain containing 4	0.583	10.8	0.219	-0.0915	10.7	0.494	-1.09	7.61	0.0194
TCZ W24 vs BL ONLY	GPR162	G protein-coupled receptor 162	-0.93	0.735	0.402	0.015	0.306	0.991	1.06	1.51	0.00338
TCZ W24 vs BL ONLY	GPR39		0.598	3.54	0.479	-0.0689	3.05	0.819	-1.01	3.77	0.035
TCZ W24 vs BL ONLY	GPR68	G protein-coupled receptor 68	0.939	24.5	0.372	-0.2	30.2	0.0886	-2	14	0.0098
TCZ W24 vs BL ONLY	GRB10	growth factor receptor-bound protein 10	0.386	7.92	0.535	0.0569	8.75	0.638	-1.12	5.12	0.02
TCZ W24 vs BL ONLY	GRIA3	glutamate receptor, ionotropic, AMPA 3	0.311	8.71	0.873	-0.0157	9.92	0.942	-0.809	1.48	0.0389
TCZ W24 vs BL ONLY	GRK6	G protein-coupled receptor kinase 6	0.454	8.15	0.187	0.00227	8.51	0.995	-0.782	6.71	0.0355
TCZ W24 vs BL ONLY	GRPEL1	GrpE-like 1, mitochondrial (E. coli)	0.483	17.4	0.05	-0.0808	17.7	0.582	-0.746	16.5	0.0212
TCZ W24 vs BL ONLY	GRWD1	glutamate-rich WD repeat containing 1	0.345	19.1	0.425	-0.0378	19.1	0.83	-1.1	12.5	0.00472
TCZ W24 vs BL ONLY	GSDMD	gasdermin D	-0.476	6.28	0.247	0.0369	5.1	0.877	0.63	7.02	0.0163
TCZ W24 vs BL ONLY	GSK3A	glycogen synthase kinase 3 alpha	0.141	30.9	0.666	0.000429	29.9	0.999	-0.587	23.7	0.0228
TCZ W24 vs BL ONLY	GSPT1	G1 to S phase transition 1	0.359	24.4	0.353	-0.0774	25.7	0.416	-0.861	15.8	0.0123
TCZ W24 vs BL ONLY	GSTA4	glutathione S-transferase alpha 4	-0.327	10.1	0.524	0.0663	6.57	0.779	0.658	13.1	0.0458
TCZ W24 vs BL ONLY	GUCY1B3	guanylate cyclase 1, soluble, beta 3	-0.558	1.05	0.425	-0.0228	0.79	0.96	1.93	1.55	0.00324
TCZ W24 vs BL ONLY	GXYLT1	glucoside xylosyltransferase 1	0.731	2.67	0.0704	-0.093	2.86	0.644	-0.835	1.81	0.0235
TCZ W24 vs BL ONLY	GXYLT2	glucoside xylosyltransferase 2	0.304	8.6	0.733	0.00745	14	0.986	-0.932	5.46	0.0318
TCZ W24 vs BL ONLY	H1FX	H1 histone family, member X	-0.521	29.3	0.146	0.138	28.8	0.245	0.648	35.9	0.032
TCZ W24 vs BL ONLY	HAPLN3	hyaluronan and proteoglycan link protein 3	1.39	5.9	0.0597	0.151	4.84	0.27	-1.04	5.62	0.00559
TCZ W24 vs BL ONLY	HARS	histidyl-tRNA synthetase	0.372	16.6	0.102	-0.036	17.1	0.795	-0.637	13.7	0.0152
TCZ W24 vs BL ONLY	HAUS1	HAUS augmin-like complex, subunit 1	-0.394	8.35	0.639	-0.0368	7.14	0.905	1.07	16.8	0.0317
TCZ W24 vs BL ONLY	HAUS4	HAUS augmin-like complex, subunit 4	-0.773	7.52	0.0958	0.0733	6.7	0.744	0.82	12.3	0.0355
TCZ W24 vs BL ONLY	HAUS5	HAUS augmin-like complex, subunit 5	-0.165	0.84	0.8	0.00381	0.876	0.996	0.877	1.05	0.0117
TCZ W24 vs BL ONLY	HBP1	HMG-box transcription factor 1	-0.679	16.3	0.189	0.0376	15	0.795	1.1	23.6	0.0197
TCZ W24 vs BL ONLY	HDHD3	haloacid dehalogenase-like hydrolase domain containing 3	-0.591	1.35	0.19	0.0916	1.34	0.848	0.851	1.75	0.00989
TCZ W24 vs BL ONLY	HEATR1	HEAT repeat containing 1	0.2	10.1	0.581	-0.0728	10.2	0.582	-0.605	6.61	0.0401
TCZ W24 vs BL ONLY	HEATR3	HEAT repeat containing 3	0.494	6.65	0.0534	-0.0533	6.84	0.777	-0.665	6.43	0.00822
TCZ W24 vs BL ONLY	HECTD2	HECT domain containing E3 ubiquitin protein ligase 2	0.453	3.69	0.139	-0.0738	3.84	0.684	-1.24	2.42	0.00549
TCZ W24 vs BL ONLY	HEMK1	HemK methyltransferase family member 1	-0.223	1.75	0.633	0.0391	1.61	0.883	0.628	2.51	0.0172
TCZ W24 vs BL ONLY	HERC5	HECT and RLD domain containing E3 ubiquitin protein ligase 5	-1.61	1.3	0.326	-0.145	1.2	0.729	0.769	1.16	0.0325
TCZ W24 vs BL ONLY	HES1	hes family bHLH transcription factor 1	1.07	8.44	0.349	0.049	11.3	0.878	-2.32	5.03	0.00611
TCZ W24 vs BL ONLY	HES4	hes family bHLH transcription factor 4	0.00979	2.99	0.994	0.0138	1.86	0.989	-0.951	2.58	0.0129
TCZ W24 vs BL ONLY	HES6	hes family bHLH transcription factor 6	0.695	0.912	0.573	-0.151	0.693	0.787	-0.905	1.3	0.0345
TCZ W24 vs BL ONLY	HGF	hepatocyte growth factor (hepapoietin A; scatter factor)	-1.01	0.833	0.577	0.16	0.342	0.64	1.47	3.66	0.00308
TCZ W24 vs BL ONLY	HHAT	hedgehog acyltransferase	0.639	1.66	0.261	-0.0943	1.53	0.697	-0.816	1.58	0.0389
TCZ W24 vs BL ONLY	HHEX	hematopoietically expressed homeobox	0.153	0.15	0.957	0.101	0.111	0.922	1.62	1.43	0.0114
TCZ W24 vs BL ONLY	HIATL1	hippocampus abundant transcript-like 1	0.418	19.3	0.157	-0.0391	22.4	0.769	-0.658	14.6	0.0121
TCZ W24 vs BL ONLY	HIC1	hypermethylated in cancer 1	0.0165	40.6	0.988	0.121	49.1	0.467	-0.972	20.9	0.0273
TCZ W24 vs BL ONLY	HIP1	huntingtin interacting protein 1	1.07	12	0.0725	0.00672	13.9	0.977	-1.06	6.63	0.018
TCZ W24 vs BL ONLY	HIPK3	homeodomain interacting protein kinase 3	-0.0558	13.1	0.936	-0.107	13.4	0.38	-0.821	8.13	0.0143
TCZ W24 vs BL ONLY	HIST3H2A	histone cluster 3, H2a	-0.655	1.57	0.534	0.261	1.43	0.699	1.41	3.77	0.0129
TCZ W24 vs BL ONLY	HIVEP1	human immunodeficiency virus type I enhancer binding protein 1	0.318	4.48	0.744	-0.0699	5.26	0.635	-1.01	2.41	0.0202
TCZ W24 vs BL ONLY	HIVEP2	human immunodeficiency virus type I enhancer binding protein 2	0.547	15	0.485	-0.0989	15	0.312	-1.57	6.95	0.0195
TCZ W24 vs BL ONLY	HK2	hexokinase 2	0.1	2.62	0.933	-0.121	2.02	0.429	-1.14	1.65	0.0278
TCZ W24 vs BL ONLY	HLX	H2.0-like homeobox	0.275	22.4	0.79	-0.0927	24.5	0.469	-0.645	7.83	0.0447
TCZ W24 vs BL ONLY	HMGB2	high mobility group box 2	-0.3	7.05	0.868	0.181	7.97	0.23	1.8	7.48	0.0308
TCZ W24 vs BL ONLY	HMGCL	3-hydroxymethyl-3-methylglutaryl-CoA lyase	-0.374	12.3	0.284	0.0139	11	0.967	0.844	15.4	0.0203
TCZ W24 vs BL ONLY	HMGN3	high mobility group nucleosomal binding domain 3	-0.212	3.05	0.846	0.176	2.79	0.433	1.04	8.98	0.0325
TCZ W24 vs BL ONLY	HMGXB3	HMG box domain containing 3	0.703	12.8	0.06	-0.0258	17.2	0.864	-1.11	9.63	0.0101
TCZ W24 vs BL ONLY	HNMT	histamine N-methyltransferase	-0.908	1.56	0.309	0.0191	1.24	0.98	1.11	3.34	0.0102
TCZ W24 vs BL ONLY	HNRNPAB	heterogeneous nuclear ribonucleoprotein A/B	0.674	87.3	0.104	-0.0369	94.6	0.769	-1.25	53.3	0.00621
TCZ W24 vs BL ONLY	HNRNPR	heterogeneous nuclear ribonucleoprotein R	0.54	13.4	0.0674	-0.0237	14	0.881	-0.726	10	0.0261
TCZ W24 vs BL ONLY	HOOK3	hook microtubule-tethering protein 3	0.234	4.62	0.432	-0.0696	4.78	0.659	-0.703	3.54	0.0178
TCZ W24 vs BL ONLY	HOPX	HOP homeobox	1.94	0.0176	0.58	0	0.0335	1	1.09	1.18	0.0388
TCZ W24 vs BL ONLY	HOXA5	homeobox A5	-0.376	0.321	0.867	0.199	0.21	0.841	1.42	3.21	0.0114
TCZ W24 vs BL ONLY	HOXB3	homeobox B3	-0.367	2.92	0.602	0.126	2.78	0.525	0.974	3.87	0.00348
TCZ W24 vs BL ONLY	HOXB4	homeobox B4	-0.19	1.7	0.825	0.0459	1.63	0.918	0.862	2.21	0.00888
TCZ W24 vs BL ONLY	HOXB5	homeobox B5	0.348	2.09	0.896	0.0925	1.74	0.769	1.01	7.27	0.00829
TCZ W24 vs BL ONLY	HOXB7	homeobox B7	0.676	4.57	0.565	0.0931	4.22	0.757	0.668	8.92	0.049
TCZ W24 vs BL ONLY	HPS3	Hermansky-Pudlak syndrome 3	-0.568	4.78	0.107	-0.0532	3.83	0.764	0.663	6.48	0.0366
TCZ W24 vs BL ONLY	HRH1	histamine receptor H1	-0.667	2.87	0.262	-0.0185	3.01	0.949	1.19	3.86	0.0361
TCZ W24 vs BL ONLY	HRSP12	heat-responsive protein 12	-0.0654	12.5	0.957	-0.086	6.47	0.691	1.31	23.9	0.0207
TCZ W24 vs BL ONLY	HS3ST3A1	heparan sulfate (glucosamine) 3-O-sulfotransferase 3A1	0.744	17.3	0.16	-0.0179	25.4	0.936	-1.74	11	0.00404
TCZ W24 vs BL ONLY	HS3ST3B1	heparan sulfate (glucosamine) 3-O-sulfotransferase 3B1	0.576	12.3	0.536	-0.105	18.8	0.27	-1.35	6.94	0.01
TCZ W24 vs BL ONLY	HS6ST1	heparan sulfate 6-O-sulfotransferase 1	-0.477	1.25	0.433	-0.00365	1.3	0.996	0.871	1.32	0.0475
TCZ W24 vs BL ONLY	HSBP1L1	heat shock factor binding protein 1-like 1	-0.829	5.39	0.102	0.027	2.87	0.966	1.19	7.87	0.0193
TCZ W24 vs BL ONLY	HSCB	HscB mitochondrial iron-sulfur cluster co-chaperone	-0.421	5.99	0.483	-0.113	5.33	0.665	1.12	14.3	0.0243
TCZ W24 vs BL ONLY	HSD17B11	hydroxysteroid (17-beta) dehydrogenase 11	-0.143	12.1	0.838	-0.00769	10.4	0.984	0.648	19.5	0.0346
TCZ W24 vs BL ONLY	HSDL2	hydroxysteroid dehydrogenase like 2	-0.348	8.63	0.422	0.00955	7.78	0.974	0.657	12.8	0.0352
TCZ W24 vs BL ONLY	HSF2	heat shock transcription factor 2	-0.147	1.99	0.82	-0.0333	1.88	0.933	0.62	3.17	0.0493
TCZ W24 vs BL ONLY	HSF4	heat shock transcription factor 4	-0.457	1.25	0.487	0.162	0.917	0.632	1.08	1.85	0.00491
TCZ W24 vs BL ONLY	HSP90AB1	heat shock protein 90kDa alpha (cytosolic), class B member 1	0.152	175	0.646	-0.0531	179	0.621	-0.599	132	0.0156
TCZ W24 vs BL ONLY	HSPA12A	heat shock 70kDa protein 12A	-0.0842	4.9	0.926	-0.0847	4.34	0.549	-0.699	3.32	0.0207
TCZ W24 vs BL ONLY	HSPA4L	heat shock 70kDa protein 4-like	-0.749	0.761	0.258	0.000416	0.37	0.999	0.707	1.01	0.0239
TCZ W24 vs BL ONLY	HSPA5	heat shock 70kDa protein 5 (glucose-regulated protein, 78kDa)	0.55	131	0.295	-0.0334	148	0.769	-0.695	88.4	0.0125
TCZ W24 vs BL ONLY	HSPA9	heat shock 70kDa protein 9 (mortalin)	0.401	39.6	0.273	-0.037	45.1	0.795	-0.734	28.3	0.0128
TCZ W24 vs BL ONLY	HSPB11	heat shock protein family B (small), member 11	-0.192	7.81	0.789	0.0114	6.25	0.986	0.896	16.6	0.0468
TCZ W24 vs BL ONLY	HSPB7	heat shock 27kDa protein family, member 7 (cardiovascular)	0.708	31.9	0.475	0.21	59.2	0.104	-1.41	27.9	0.00382
TCZ W24 vs BL ONLY	HSPB8	heat shock 22kDa protein 8	0.66	13.3	0.547	0.0791	11.4	0.714	-1.11	14	0.0112
TCZ W24 vs BL ONLY	HSPD1	heat shock 60kDa protein 1 (chaperonin)	0.205	20.4	0.509	-0.0804	18.5	0.518	-0.634	17.6	0.0247
TCZ W24 vs BL ONLY	HSPH1	heat shock 105kDa/110kDa protein 1	-0.0297	24.5	0.971	-0.0966	24.2	0.4	-1.11	14.5	0.00776
TCZ W24 vs BL ONLY	HTATIP2	HIV-1 Tat interactive protein 2, 30kDa	-0.478	9.69	0.575	0.105	7.74	0.53	0.946	16.4	0.0331
TCZ W24 vs BL ONLY	HYLS1	hydrolethalus syndrome 1	-0.641	1.67	0.232	0.122	1.47	0.67	0.8	1.99	0.0448
TCZ W24 vs BL ONLY	HYOU1	hypoxia up-regulated 1	0.733	31.6	0.182	-0.0687	41.8	0.527	-1.04	17.5	0.013
TCZ W24 vs BL ONLY	IDH3A	isocitrate dehydrogenase 3 (NAD+) alpha	0.367	11	0.138	-0.138	10.3	0.224	-0.784	9.49	0.0067
TCZ W24 vs BL ONLY	IDI2	isopentenyl-diphosphate delta isomerase 2	0.678	2.12	0.215	0.102	2.33	0.795	-1.13	1.52	0.0166
TCZ W24 vs BL ONLY	IER3		0.95	338	0.126	0.0458	373	0.72	-1.91	138	0.00328
TCZ W24 vs BL ONLY	IER5L	immediate early response 5-like	0.437	15	0.385	0.0545	18.7	0.765	-1.01	12.9	0.00928
TCZ W24 vs BL ONLY	IFFO2	intermediate filament family orphan 2	0.95	5.67	0.0653	-0.00387	8.37	0.991	-1.78	3.85	0.00822
TCZ W24 vs BL ONLY	IFI44	interferon-induced protein 44	-1.32	30.2	0.187	-0.176	15	0.527	1.03	32.8	0.0237
TCZ W24 vs BL ONLY	IFI44L	interferon-induced protein 44-like	-2.04	9.17	0.136	-0.17	6.59	0.493	0.957	11.9	0.0118
TCZ W24 vs BL ONLY	IFIT1	interferon-induced protein with tetratricopeptide repeats 1	-1.53	42.2	0.284	-0.176	31.3	0.505	1.1	42.1	0.0361
TCZ W24 vs BL ONLY	IFIT2	interferon-induced protein with tetratricopeptide repeats 2	-1.29	9.54	0.429	-0.055	19	0.918	1.41	13.3	0.0333
TCZ W24 vs BL ONLY	IFIT3	interferon-induced protein with tetratricopeptide repeats 3	-1.25	49.8	0.368	-0.103	43.2	0.76	1.13	56.6	0.0362
TCZ W24 vs BL ONLY	IFITM1	interferon induced transmembrane protein 1	-1.35	262	0.168	-0.116	197	0.639	0.654	251	0.0348
TCZ W24 vs BL ONLY	IFT172	intraflagellar transport 172	-0.608	1.62	0.119	0.0841	1.63	0.69	0.628	1.34	0.0403
TCZ W24 vs BL ONLY	IFT74	intraflagellar transport 74	-0.437	2.72	0.122	0.0992	2.66	0.694	0.782	3.55	0.0198
TCZ W24 vs BL ONLY	IGF1R	insulin-like growth factor 1 receptor	0.252	8.2	0.773	-0.0028	9.91	0.992	-0.677	3.75	0.0393
TCZ W24 vs BL ONLY	IGFBP3	insulin-like growth factor binding protein 3	-0.57	1080	0.789	0.0571	860	0.596	-1.59	387	0.0174
TCZ W24 vs BL ONLY	IL1RAP	interleukin 1 receptor accessory protein	0.678	4.55	0.269	-0.144	4.78	0.193	-1.47	2.8	0.00621
TCZ W24 vs BL ONLY	IL4R	interleukin 4 receptor	0.208	16	0.677	0.104	14.2	0.27	-0.908	10.3	0.0113
TCZ W24 vs BL ONLY	IL6	interleukin 6	2.4	51.9	0.0847	-0.315	38.8	0.0617	-2	70.8	0.0128
TCZ W24 vs BL ONLY	IL7	interleukin 7	-0.802	0.694	0.251	-0.117	0.557	0.867	1.19	1.44	0.00869
TCZ W24 vs BL ONLY	IMPA2	inositol(myo)-1(or 4)-monophosphatase 2	-0.773	3.65	0.33	0.0266	2.89	0.959	0.737	4.34	0.0322
TCZ W24 vs BL ONLY	INAFM2	InaF-motif containing 2	0.916	4.06	0.0819	0.0519	4.6	0.788	-1.19	2.81	0.0128
TCZ W24 vs BL ONLY	ING4	inhibitor of growth family, member 4	-0.71	8.58	0.305	0.172	8.2	0.23	1.4	20.7	0.0159
TCZ W24 vs BL ONLY	INPP5A	inositol polyphosphate-5-phosphatase, 40kDa	0.456	9.67	0.319	0.00803	12.1	0.974	-0.605	7.13	0.0208
TCZ W24 vs BL ONLY	IPO4	importin 4	0.536	15.1	0.167	-0.0695	16.8	0.537	-0.912	9.87	0.0138
TCZ W24 vs BL ONLY	IPO5	importin 5	0.417	73.3	0.304	-0.0768	82.5	0.454	-0.771	53.5	0.00933
TCZ W24 vs BL ONLY	IPO7	importin 7	0.397	34.6	0.115	-0.0693	34.5	0.512	-1.04	26.6	0.00451
TCZ W24 vs BL ONLY	IPPK	inositol 1,3,4,5,6-pentakisphosphate 2-kinase	0.521	3.38	0.0386	-0.0226	3.52	0.932	-0.836	2.55	0.0101
TCZ W24 vs BL ONLY	IQCJ-SCHIP1	IQCJ-SCHIP1 readthrough	0.548	10.5	0.204	0.0279	10.5	0.898	-0.759	10.5	0.0192
TCZ W24 vs BL ONLY	IRAK1	interleukin-1 receptor-associated kinase 1	0.513	36.8	0.0837	-0.0181	40.4	0.912	-0.713	27.3	0.0249
TCZ W24 vs BL ONLY	IRAK1BP1	interleukin-1 receptor-associated kinase 1 binding protein 1	-0.632	0.501	0.346	0.139	0.496	0.72	1.23	1.04	0.0261
TCZ W24 vs BL ONLY	IRF1	interferon regulatory factor 1	-1.1	5.03	0.0845	-0.109	4.22	0.657	1.29	5.75	0.0055
TCZ W24 vs BL ONLY	IRF2BP2	interferon regulatory factor 2 binding protein 2	0.31	28.7	0.572	-0.0328	35.1	0.779	-1.03	16.6	0.0175
TCZ W24 vs BL ONLY	IRF9	interferon regulatory factor 9	-0.494	40.4	0.317	-0.0662	37.6	0.745	0.624	45.3	0.0279
TCZ W24 vs BL ONLY	IRS2	insulin receptor substrate 2	0.179	13	0.898	0.0321	21.8	0.853	-1.23	4.77	0.0135
TCZ W24 vs BL ONLY	ISCA2	iron-sulfur cluster assembly 2	-0.683	4.56	0.388	-0.068	3.81	0.859	1.75	12.1	0.0104
TCZ W24 vs BL ONLY	ISG20L2	interferon stimulated exonuclease gene 20kDa-like 2	0.242	7.95	0.44	0.00212	8.04	0.996	-0.645	6.38	0.0139
TCZ W24 vs BL ONLY	ITCH	itchy E3 ubiquitin protein ligase	0.535	14.2	0.0222	-0.0457	16.1	0.72	-0.717	12	0.0175
TCZ W24 vs BL ONLY	ITGA1	integrin, alpha 1	1.12	23.5	0.1	0.0276	20.6	0.882	-1.3	22.9	0.0111
TCZ W24 vs BL ONLY	ITGB3BP	integrin beta 3 binding protein (beta3-endonexin)	-0.777	1.69	0.391	0.0724	1.43	0.877	1.43	3.73	0.0228
TCZ W24 vs BL ONLY	ITPRIP	inositol 1,4,5-trisphosphate receptor interacting protein	1.35	18.4	0.0851	-0.0715	18.7	0.57	-2.41	7.76	0.00457
TCZ W24 vs BL ONLY	ITPRIPL2	inositol 1,4,5-trisphosphate receptor interacting protein-like 2	0.518	32.5	0.343	-0.0316	34.5	0.891	-1.28	15.1	0.0129
TCZ W24 vs BL ONLY	IWS1	IWS1 homolog (S. cerevisiae)	0.452	13.3	0.107	-0.00361	14.3	0.991	-0.645	10.4	0.0179
TCZ W24 vs BL ONLY	JADE3	jade family PHD finger 3	0.754	2.77	0.202	0.0185	3.62	0.943	-0.912	1.75	0.0139
TCZ W24 vs BL ONLY	JARID2	jumonji, AT rich interactive domain 2	0.347	3.63	0.79	-0.237	2.24	0.0617	-1.43	1.72	0.0317
TCZ W24 vs BL ONLY	JDP2	Jun dimerization protein 2	0.255	9.35	0.644	0.0823	12.5	0.414	-0.803	6.19	0.0227
TCZ W24 vs BL ONLY	JMJD7	jumonji domain containing 7	-0.54	1.23	0.196	-0.0867	1.13	0.885	0.921	1.92	0.0106
TCZ W24 vs BL ONLY	JMJD7-PLA2G4B	JMJD7-PLA2G4B readthrough	-0.65	0.658	0.163	0.0173	0.572	0.985	1.12	1.14	0.00389
TCZ W24 vs BL ONLY	JUN	jun proto-oncogene	-1.11	43.4	0.103	-0.0365	46.5	0.787	0.726	23.5	0.0238
TCZ W24 vs BL ONLY	KAT6B	K(lysine) acetyltransferase 6B	-0.598	2.39	0.161	-0.046	2.73	0.782	1.06	2.42	0.00472
TCZ W24 vs BL ONLY	KCNC4	potassium voltage-gated channel, Shaw-related subfamily, member 4	0.242	2.77	0.841	-0.125	3.04	0.341	-0.814	1.46	0.0352
TCZ W24 vs BL ONLY	KCNK2	potassium channel, subfamily K, member 2	-1.42	27.1	0.249	-0.0996	26.7	0.301	0.702	9.57	0.0223
TCZ W24 vs BL ONLY	KCNS3	potassium voltage-gated channel, delayed-rectifier, subfamily S, member 3	1.13	2.66	0.0876	-0.103	2.78	0.707	-0.914	1.57	0.0101
TCZ W24 vs BL ONLY	KCTD13	potassium channel tetramerization domain containing 13	0.637	4.06	0.0512	-0.0622	4.91	0.824	-0.716	3.79	0.0165
TCZ W24 vs BL ONLY	KCTD15	potassium channel tetramerization domain containing 15	0.119	8.26	0.9	0.00801	12.3	0.978	-0.961	4.63	0.036
TCZ W24 vs BL ONLY	KCTD18	potassium channel tetramerization domain containing 18	-0.0925	5.29	0.859	0.0541	6.06	0.791	0.629	6.98	0.034
TCZ W24 vs BL ONLY	KCTD3	potassium channel tetramerization domain containing 3	-0.381	10.8	0.0709	-0.0361	10.7	0.806	0.702	10.9	0.0266
TCZ W24 vs BL ONLY	KCTD5	potassium channel tetramerization domain containing 5	0.552	17.2	0.232	-0.0158	17.5	0.931	-0.955	12.2	0.00755
TCZ W24 vs BL ONLY	KHDC1	KH homology domain containing 1	-0.436	1.35	0.158	0.114	1.17	0.803	0.732	1.62	0.0294
TCZ W24 vs BL ONLY	KIAA0247	KIAA0247	0.919	18.4	0.174	-0.165	18.1	0.139	-1.32	8.69	0.0143
TCZ W24 vs BL ONLY	KIAA1549L	KIAA1549-like	-0.227	5.79	0.916	-0.116	6.27	0.38	-0.902	1.14	0.0379
TCZ W24 vs BL ONLY	KIAA1644	KIAA1644	0.546	7.52	0.642	-0.121	9.53	0.346	-1.58	2.81	0.014
TCZ W24 vs BL ONLY	KIAA1755	KIAA1755	1.19	3.75	0.42	-0.059	4.01	0.767	-2.02	2.88	0.0225
TCZ W24 vs BL ONLY	KIF22	kinesin family member 22	0.293	2.82	0.753	0.114	3.93	0.628	0.853	3.17	0.0265
TCZ W24 vs BL ONLY	KIFC2	kinesin family member C2	-0.455	2.15	0.456	-0.0353	1.04	0.927	0.65	2.73	0.0312
TCZ W24 vs BL ONLY	KIRREL	kin of IRRE like (Drosophila)	0.771	42.2	0.175	-0.0362	52.8	0.758	-1.06	23.8	0.024
TCZ W24 vs BL ONLY	KIZ	kizuna centrosomal protein	-0.715	3.88	0.0586	0.146	3.83	0.498	0.824	4.94	0.0226
TCZ W24 vs BL ONLY	KLC1	kinesin light chain 1	0.333	34.1	0.355	0.0151	33.1	0.919	-0.839	30.5	0.0217
TCZ W24 vs BL ONLY	KLC2	kinesin light chain 2	0.441	12.1	0.249	0.0181	12	0.916	-0.689	9.02	0.024
TCZ W24 vs BL ONLY	KLF13	Kruppel-like factor 13	0.485	17.2	0.522	0.00128	20.6	0.997	-1.26	7.94	0.0225
TCZ W24 vs BL ONLY	KLF16	Kruppel-like factor 16	0.301	10.3	0.524	0.0944	12.2	0.672	-0.782	7.09	0.0266
TCZ W24 vs BL ONLY	KLHDC2	kelch domain containing 2	-0.55	15.1	0.267	0.0575	14.1	0.666	0.775	23.5	0.0331
TCZ W24 vs BL ONLY	KLHL13	kelch-like family member 13	2.18	0.0465	0.523	0.322	0.0418	0.588	0.941	1.19	0.0102
TCZ W24 vs BL ONLY	KLHL18	kelch-like family member 18	0.456	6.1	0.11	-0.00703	6.76	0.986	-0.763	4.94	0.0203
TCZ W24 vs BL ONLY	KLHL21	kelch-like family member 21	0.686	12.3	0.123	0.0276	12	0.865	-1.1	9.36	0.0114
TCZ W24 vs BL ONLY	KLHL24	kelch-like family member 24	-0.208	2.06	0.797	-0.00587	2.41	0.991	0.626	1.89	0.0347
TCZ W24 vs BL ONLY	KLHL26	kelch-like family member 26	0.994	1.85	0.282	-0.0781	1.84	0.758	-1.58	1.59	0.00405
TCZ W24 vs BL ONLY	KLHL29	kelch-like family member 29	1.02	5.33	0.177	-0.105	5.04	0.483	-1.03	3.69	0.0145
TCZ W24 vs BL ONLY	KLHL42	kelch-like family member 42	0.442	9.27	0.11	-0.127	9.64	0.244	-1.23	7.91	0.00611
TCZ W24 vs BL ONLY	KLHL7	kelch-like family member 7	0.725	12.5	0.208	-0.0843	10.6	0.502	-1.01	13.1	0.00792
TCZ W24 vs BL ONLY	KPNA1	karyopherin alpha 1 (importin alpha 5)	0.156	12.1	0.614	-0.0613	13.4	0.599	-0.61	9.46	0.018
TCZ W24 vs BL ONLY	KPNA4	karyopherin alpha 4 (importin alpha 3)	0.387	13.8	0.208	-0.133	12.5	0.204	-0.855	11.9	0.00947
TCZ W24 vs BL ONLY	KRBOX1	KRAB box domain containing 1	0.113	2.08	0.944	-0.0756	1.82	0.928	1.19	6.18	0.0432
TCZ W24 vs BL ONLY	KRTAP1-5		-1.51	3.01	0.176	0.0715	1.32	0.883	1.33	4.14	0.0037
TCZ W24 vs BL ONLY	KSR1	kinase suppressor of ras 1	1.52	3.27	0.0851	0.0851	3.81	0.537	-1.43	2.14	0.0179
TCZ W24 vs BL ONLY	KTI12	KTI12 homolog, chromatin associated (S. cerevisiae)	0.198	9.57	0.501	0.0264	9.6	0.912	-0.761	7.56	0.0179
TCZ W24 vs BL ONLY	LACTB2	lactamase, beta 2	0.00994	2.72	0.992	-0.0335	2.54	0.942	1.33	7.34	0.0166
TCZ W24 vs BL ONLY	LAMA5	laminin, alpha 5	0.18	0.578	0.933	-0.151	0.585	0.469	0.714	1.89	0.0257
TCZ W24 vs BL ONLY	LANCL2	LanC lantibiotic synthetase component C-like 2 (bacterial)	0.683	5.07	0.0604	0.114	9.08	0.313	-0.647	4.78	0.0146
TCZ W24 vs BL ONLY	LARP1B	La ribonucleoprotein domain family, member 1B	0.537	2.06	0.0984	-0.017	1.98	0.943	-1	1.76	0.00402
TCZ W24 vs BL ONLY	LARP4B	La ribonucleoprotein domain family, member 4B	0.35	6.96	0.478	-0.0395	7.26	0.752	-0.633	4.28	0.0434
TCZ W24 vs BL ONLY	LARP6	La ribonucleoprotein domain family, member 6	0.415	39.4	0.188	-0.00527	41.2	0.984	-0.635	33.6	0.0166
TCZ W24 vs BL ONLY	LAT	linker for activation of T cells	0.0343	0.789	0.987	0.234	0.254	0.793	0.851	1.37	0.0219
TCZ W24 vs BL ONLY	LATS2	large tumor suppressor kinase 2	0.467	12.7	0.28	-0.0109	13.6	0.952	-0.884	8.24	0.00932
TCZ W24 vs BL ONLY	LBH	limb bud and heart development	1.16	46.2	0.376	0.11	27.1	0.314	-1.31	101	0.00328
TCZ W24 vs BL ONLY	LCMT2	leucine carboxyl methyltransferase 2	0.257	4.98	0.438	-0.0522	5.09	0.801	-0.608	3.42	0.0226
TCZ W24 vs BL ONLY	LDB1	LIM domain binding 1	-0.139	11.8	0.771	0.0963	11.1	0.516	0.746	17	0.00764
TCZ W24 vs BL ONLY	LDB2	LIM domain binding 2	-1.03	5.37	0.0858	0.0211	6.32	0.939	1.02	5.46	0.0169
TCZ W24 vs BL ONLY	LDLRAD3	low density lipoprotein receptor class A domain containing 3	0.444	4.58	0.345	-0.0948	5.44	0.58	-0.743	2.73	0.0398
TCZ W24 vs BL ONLY	LEMD3	LEM domain containing 3	0.557	8.09	0.188	-0.0393	9.89	0.792	-1.04	5.35	0.00611
TCZ W24 vs BL ONLY	LEO1	Leo1, Paf1/RNA polymerase II complex component, homolog (S. cerevisiae)	0.405	9.28	0.156	0.0108	9.73	0.964	-0.625	6.34	0.0398
TCZ W24 vs BL ONLY	LGMN	legumain	0.337	57.5	0.689	0.119	63.3	0.205	-0.703	27.7	0.0306
TCZ W24 vs BL ONLY	LHFPL2	lipoma HMGIC fusion partner-like 2	0.0856	13.3	0.915	-0.103	13.8	0.346	-0.838	8.93	0.048
TCZ W24 vs BL ONLY	LIAS	lipoic acid synthetase	-0.281	1.02	0.783	0.11	0.984	0.869	1.24	2.53	0.0143
TCZ W24 vs BL ONLY	LIG1	ligase I, DNA, ATP-dependent	-0.236	1.66	0.659	0.116	2.11	0.644	0.593	1.61	0.0213
TCZ W24 vs BL ONLY	LIMCH1	LIM and calponin homology domains 1	0.243	2.44	0.909	0.0917	8.51	0.458	-0.625	1.22	0.0484
TCZ W24 vs BL ONLY	LIMS2	LIM and senescent cell antigen-like domains 2	0.586	12.3	0.316	0.155	11.2	0.193	-0.862	12.3	0.0396
TCZ W24 vs BL ONLY	LIN54	lin-54 DREAM MuvB core complex component	-0.0603	1.45	0.936	0.0308	1.78	0.918	0.711	1.67	0.0445
TCZ W24 vs BL ONLY	LIPT1	lipoyltransferase 1	-0.842	0.677	0.0928	0.0909	0.492	0.895	1.04	1.08	0.0192
TCZ W24 vs BL ONLY	LMNB2	lamin B2	0.526	20.3	0.274	-0.0166	28.8	0.939	-0.762	14.9	0.0325
TCZ W24 vs BL ONLY	LMO7	LIM domain 7	-0.0679	23.9	0.928	0.0275	27.5	0.862	-0.802	21.9	0.0194
TCZ W24 vs BL ONLY	LMOD1	leiomodin 1 (smooth muscle)	1.62	13.4	0.188	0.124	10.5	0.423	-0.699	30.4	0.0307
TCZ W24 vs BL ONLY	LOC100287387	uncharacterized LOC100287387	-0.695	5.18	0.438	0.000946	5.35	0.998	0.752	3	0.0124
TCZ W24 vs BL ONLY	LOC100506870	uncharacterized LOC100506870	-0.701	1.74	0.325	0.0363	1.45	0.966	1.2	3.42	0.0194
TCZ W24 vs BL ONLY	LOC100862671	uncharacterized LOC100862671	-0.569	1.06	0.115	-0.106	1.04	0.836	0.659	1.23	0.0314
TCZ W24 vs BL ONLY	LOC100996846	myosin light chain kinase 2, skeletal/cardiac muscle-like	-0.12	20.4	0.919	-0.0817	15.7	0.613	-1.27	14.9	0.00653
TCZ W24 vs BL ONLY	LOC101060399	cerebellar degeneration-related protein 2-like	0.26	23.8	0.499	0.0429	31.6	0.763	-0.693	19.4	0.0108
TCZ W24 vs BL ONLY	LOC101060521	DNA-directed RNA polymerase III subunit RPC5-like	0.267	6.42	0.344	-0.0356	6.93	0.884	-0.6	4.53	0.0437
TCZ W24 vs BL ONLY	LOC101927930	aflatoxin B1 aldehyde reductase member 4-like	0.536	5.47	0.0535	-0.0582	5.51	0.803	-0.881	5.42	0.0116
TCZ W24 vs BL ONLY	LOC101928352	uncharacterized LOC101928352	0.481	64.7	0.399	0.0138	76.9	0.949	-0.794	48.3	0.0295
TCZ W24 vs BL ONLY	LOC101928356	uncharacterized LOC101928356	0.594	1.57	0.285	-0.0884	1.08	0.838	-0.78	1.32	0.0256
TCZ W24 vs BL ONLY	LOC101928498	uncharacterized LOC101928498	0.0225	1.19	0.953	0.13	1.25	0.776	0.622	1.42	0.026
TCZ W24 vs BL ONLY	LOC101929220	WAS/WASL-interacting protein family member 1-like	-0.481	3.11	0.345	0.0743	3.39	0.849	0.831	4.15	0.0349
TCZ W24 vs BL ONLY	LOC101930307		-0.115	0.875	0.908	0.181	0.879	0.69	0.809	1.08	0.038
TCZ W24 vs BL ONLY	LOC101930400	aldo-keto reductase family 1 member C2-like	0.0296	8.09	0.985	-0.123	4.26	0.729	0.849	14.1	0.0318
TCZ W24 vs BL ONLY	LOC101930480	uncharacterized LOC101930480	0.227	1.81	0.767	0.0164	1.38	0.989	-1.14	1.4	0.00746
TCZ W24 vs BL ONLY	LOC102723375	uncharacterized LOC102723375	0.688	17.6	0.194	0.0154	20.1	0.952	-1.34	12.5	0.0129
TCZ W24 vs BL ONLY	LOC102723726	uncharacterized LOC102723726	-1.67	5.19	0.094	-0.0239	3.85	0.963	1.18	7.34	0.00677
TCZ W24 vs BL ONLY	LOC102724249	adenomatous polyposis coli protein 2-like	0.52	8.19	0.459	0.0616	12.2	0.839	-1.55	4.55	0.0123
TCZ W24 vs BL ONLY	LOC102724258	uncharacterized LOC102724258	0.763	11.1	0.221	-0.113	12.9	0.682	-1.31	6.33	0.00789
TCZ W24 vs BL ONLY	LOC102724369	uncharacterized LOC102724369	-0.121	0.781	0.919	0.331	0.595	0.695	1.11	1.03	0.0377
TCZ W24 vs BL ONLY	LOC102724571	uncharacterized LOC102724571	-1	0.991	0.064	0.18	0.617	0.766	0.792	1.66	0.0206
TCZ W24 vs BL ONLY	LOC102724833	splicing factor, arginine/serine-rich 19-like	-0.394	3.46	0.16	-0.119	3.36	0.697	0.591	3.68	0.0227
TCZ W24 vs BL ONLY	LOC102725516	uncharacterized LOC102725516	1.01	1.6	0.0728	-0.093	2.23	0.827	-0.896	1.07	0.0299
TCZ W24 vs BL ONLY	LOC728392	uncharacterized LOC728392	1.56	24.9	0.224	0.0573	28.4	0.765	-1.16	70.1	0.00352
TCZ W24 vs BL ONLY	LOC81691	exonuclease NEF-sp	-0.949	0.687	0.196	0.232	0.685	0.533	1.35	1.05	0.0291
TCZ W24 vs BL ONLY	LOH12CR1	loss of heterozygosity, 12, chromosomal region 1	-0.187	1.44	0.715	-0.0891	1.87	0.74	0.641	1.48	0.0417
TCZ W24 vs BL ONLY	LOX	lysyl oxidase	0.743	363	0.487	-0.00797	497	0.966	-0.855	132	0.0187
TCZ W24 vs BL ONLY	LPAR1	lysophosphatidic acid receptor 1	-0.675	28.2	0.359	-0.00535	17.6	0.989	0.96	42.9	0.00557
TCZ W24 vs BL ONLY	LPAR6	lysophosphatidic acid receptor 6	-0.804	0.877	0.319	0.00725	0.509	0.995	1.18	1.89	0.00733
TCZ W24 vs BL ONLY	LPCAT2	lysophosphatidylcholine acyltransferase 2	0.137	4.65	0.77	0.151	4.73	0.277	-0.596	4.21	0.024
TCZ W24 vs BL ONLY	LPGAT1	lysophosphatidylglycerol acyltransferase 1	0.393	7.93	0.337	-0.0256	8.98	0.886	-0.599	5.39	0.0268
TCZ W24 vs BL ONLY	LPPR2	lipid phosphate phosphatase-related protein type 2	0.493	35	0.123	0.0369	38.9	0.795	-0.69	27.4	0.0157
TCZ W24 vs BL ONLY	LRCH1	leucine-rich repeats and calponin homology (CH) domain containing 1	0.169	3.22	0.743	-0.175	2.86	0.223	-0.59	2.4	0.039
TCZ W24 vs BL ONLY	LRP4	low density lipoprotein receptor-related protein 4	0.901	5.13	0.199	0.0156	8.92	0.945	-1.41	2.69	0.0187
TCZ W24 vs BL ONLY	LRRC15	leucine rich repeat containing 15	0.603	41.4	0.747	0.0203	90	0.896	-1.47	15.6	0.011
TCZ W24 vs BL ONLY	LRRC2	leucine rich repeat containing 2	-0.225	2.56	0.792	-0.00277	2.44	0.996	-1.33	1.51	0.0055
TCZ W24 vs BL ONLY	LRRC32	leucine rich repeat containing 32	0.644	22.5	0.344	-0.151	37.6	0.0843	-1.26	10.8	0.0136
TCZ W24 vs BL ONLY	LRRC45	leucine rich repeat containing 45	-0.47	1.58	0.215	0.0749	1.6	0.841	0.619	1.61	0.0382
TCZ W24 vs BL ONLY	LRRC59	leucine rich repeat containing 59	0.532	99.9	0.0657	-0.0564	112	0.585	-0.944	77.6	0.00733
TCZ W24 vs BL ONLY	LRRC8A	leucine rich repeat containing 8 family, member A	0.942	25.7	0.174	-0.0229	25.6	0.892	-1.93	16.6	0.0037
TCZ W24 vs BL ONLY	LRRC8C	leucine rich repeat containing 8 family, member C	1.63	7.56	0.0636	-0.269	7.5	0.0764	-2.34	3.18	0.00308
TCZ W24 vs BL ONLY	LRRFIP1	leucine rich repeat (in FLII) interacting protein 1	0.31	11.1	0.576	-0.0578	9.74	0.622	-1.12	9.61	0.00599
TCZ W24 vs BL ONLY	LRRN4CL	LRRN4 C-terminal like	-1.21	4.39	0.197	-0.156	2.9	0.537	0.79	4.1	0.0278
TCZ W24 vs BL ONLY	LRWD1	leucine-rich repeats and WD repeat domain containing 1	0.593	9.1	0.0797	0.0531	9.76	0.769	-0.889	7.66	0.0112
TCZ W24 vs BL ONLY	LSG1	large 60S subunit nuclear export GTPase 1	0.351	9.49	0.232	-0.0347	9.29	0.824	-0.65	7.6	0.0184
TCZ W24 vs BL ONLY	LSM11	LSM11, U7 small nuclear RNA associated	0.415	1.56	0.282	-0.0774	1.65	0.803	-0.709	1.34	0.0274
TCZ W24 vs BL ONLY	LSMEM2	leucine-rich single-pass membrane protein 2	0.36	2.83	0.251	-0.055	2.86	0.848	-0.627	2.49	0.0423
TCZ W24 vs BL ONLY	LTBP1	latent transforming growth factor beta binding protein 1	0.736	59.3	0.301	-0.0343	59.6	0.795	-0.896	63.4	0.0161
TCZ W24 vs BL ONLY	LTBP2	latent transforming growth factor beta binding protein 2	0.577	240	0.272	-0.00735	264	0.971	-0.837	170	0.0409
TCZ W24 vs BL ONLY	LTV1	LTV1 ribosome biogenesis factor	0.355	16.1	0.132	-0.0183	16.2	0.927	-0.668	13.8	0.0131
TCZ W24 vs BL ONLY	LURAP1L	leucine rich adaptor protein 1-like	-0.983	4.67	0.151	0.0761	4.96	0.716	2.09	7.17	0.00443
TCZ W24 vs BL ONLY	LUZP1	leucine zipper protein 1	0.357	15.4	0.577	0.0144	19.4	0.933	-1.14	10.2	0.0157
TCZ W24 vs BL ONLY	LXN	latexin	1.75	6.73	0.491	0.0549	6.1	0.869	0.955	77.5	0.0378
TCZ W24 vs BL ONLY	LY96	lymphocyte antigen 96	-0.251	7.65	0.784	-0.119	7.4	0.697	1.04	19.8	0.0372
TCZ W24 vs BL ONLY	LYAR	Ly1 antibody reactive	0.439	7.11	0.362	-0.0296	7.08	0.905	-1.11	4.4	0.00859
TCZ W24 vs BL ONLY	LYPD1	LY6/PLAUR domain containing 1	1.23	3.78	0.122	-0.0671	3.76	0.795	-1.19	4.48	0.0227
TCZ W24 vs BL ONLY	LYPLAL1	lysophospholipase-like 1	-0.34	1.67	0.696	-0.117	1.25	0.732	1.28	4.29	0.0223
TCZ W24 vs BL ONLY	LYRM5	LYR motif containing 5	-0.268	5	0.789	-0.0605	3.57	0.888	1.08	13.9	0.0322
TCZ W24 vs BL ONLY	LYRM9	LYR motif containing 9	-0.61	1.95	0.272	0.0454	1.45	0.933	1.12	3.36	0.0126
TCZ W24 vs BL ONLY	LYSMD4	LysM, putative peptidoglycan-binding, domain containing 4	-0.589	0.84	0.0707	-0.0352	0.755	0.95	0.701	1.06	0.0161
TCZ W24 vs BL ONLY	MAB21L1	mab-21-like 1 (C. elegans)	-1.23	0.587	0.208	-0.177	0.402	0.769	0.887	1.06	0.0295
TCZ W24 vs BL ONLY	MAFG	v-maf avian musculoaponeurotic fibrosarcoma oncogene homolog G	0.334	7.92	0.518	-0.0191	10	0.926	-0.683	5.46	0.0344
TCZ W24 vs BL ONLY	MAFK	v-maf avian musculoaponeurotic fibrosarcoma oncogene homolog K	0.974	7.22	0.265	0.0347	6.72	0.874	-1.75	6.07	0.0131
TCZ W24 vs BL ONLY	MAGI1	membrane associated guanylate kinase, WW and PDZ domain containing 1	0.828	2.85	0.178	-0.0594	3.63	0.742	-0.901	1.83	0.0334
TCZ W24 vs BL ONLY	MALT1	mucosa associated lymphoid tissue lymphoma translocation gene 1	0.174	9.69	0.774	-0.0794	10.2	0.537	-0.707	6.8	0.0203
TCZ W24 vs BL ONLY	MAMLD1	mastermind-like domain containing 1	-0.177	8.97	0.881	0.0516	14	0.748	-0.855	5.38	0.0345
TCZ W24 vs BL ONLY	MAN2A1	mannosidase, alpha, class 2A, member 1	0.151	14.9	0.856	-0.0887	23.6	0.505	-0.683	9.94	0.048
TCZ W24 vs BL ONLY	MAP1A	microtubule-associated protein 1A	-0.484	12	0.399	0.18	12.6	0.145	0.79	17.1	0.0157
TCZ W24 vs BL ONLY	MAP1S	microtubule-associated protein 1S	0.171	13.7	0.789	0.0195	14.2	0.932	-0.735	8.39	0.0286
TCZ W24 vs BL ONLY	MAP2K3	mitogen-activated protein kinase kinase 3	-0.14	25.8	0.904	-0.0608	19.7	0.676	-1.25	19	0.00771
TCZ W24 vs BL ONLY	MAP2K5	mitogen-activated protein kinase kinase 5	-0.625	4.35	0.0539	0.0381	4.72	0.872	0.647	4.5	0.0279
TCZ W24 vs BL ONLY	MAP3K12	mitogen-activated protein kinase kinase kinase 12	-0.501	4.59	0.0707	0.0508	3.56	0.807	0.796	5.75	0.00916
TCZ W24 vs BL ONLY	MAP3K14	mitogen-activated protein kinase kinase kinase 14	-0.617	1.09	0.0719	0.036	0.902	0.934	0.646	1.17	0.0198
TCZ W24 vs BL ONLY	MAP3K2	mitogen-activated protein kinase kinase kinase 2	0.147	7.36	0.815	-0.0851	8.52	0.456	-0.818	4.1	0.0067
TCZ W24 vs BL ONLY	MAP3K4	mitogen-activated protein kinase kinase kinase 4	1.22	9.88	0.065	-0.0824	15.2	0.467	-1.38	4.53	0.00554
TCZ W24 vs BL ONLY	MAP4K5	mitogen-activated protein kinase kinase kinase kinase 5	0.623	21.8	0.131	-0.0186	23.9	0.924	-0.781	13	0.0196
TCZ W24 vs BL ONLY	MAP7D1	MAP7 domain containing 1	0.519	63.3	0.142	0.099	66.5	0.283	-0.736	57.7	0.0205
TCZ W24 vs BL ONLY	MAPK12	mitogen-activated protein kinase 12	-0.161	4.55	0.706	0.0478	4.35	0.859	0.699	5.93	0.0123
TCZ W24 vs BL ONLY	MAPK1IP1L	mitogen-activated protein kinase 1 interacting protein 1-like	0.393	12.8	0.235	-0.0606	12.8	0.621	-0.656	9.83	0.00914
TCZ W24 vs BL ONLY	MAPK6	mitogen-activated protein kinase 6	0.462	11.7	0.0516	0.0307	12.4	0.854	-0.626	8.43	0.0124
TCZ W24 vs BL ONLY	MAPK8IP3	mitogen-activated protein kinase 8 interacting protein 3	-0.322	3.84	0.707	0.154	2.07	0.383	0.684	4.63	0.0312
TCZ W24 vs BL ONLY	MAPKAPK2	mitogen-activated protein kinase-activated protein kinase 2	0.271	49.1	0.567	-0.0703	49.6	0.524	-0.621	30.3	0.0291
TCZ W24 vs BL ONLY	MAPRE1	microtubule-associated protein, RP/EB family, member 1	0.549	45.6	0.0128	-0.0624	45.1	0.558	-0.741	39.1	0.0107
TCZ W24 vs BL ONLY	MARCH3	membrane-associated ring finger (C3HC4) 3, E3 ubiquitin protein ligase	1.04	1.46	0.246	-0.171	1.31	0.376	-1.47	1.56	0.0113
TCZ W24 vs BL ONLY	MARCH4	membrane-associated ring finger (C3HC4) 4, E3 ubiquitin protein ligase	0.0456	12.2	0.956	-0.0111	12.1	0.957	-1.35	9.94	0.00404
TCZ W24 vs BL ONLY	MARCH8	membrane-associated ring finger (C3HC4) 8, E3 ubiquitin protein ligase	-0.411	4.02	0.339	0.0153	4.23	0.952	0.598	3.4	0.0315
TCZ W24 vs BL ONLY	MARCKSL1	MARCKS-like 1	1.59	55.1	0.118	0.0101	55.1	0.962	-0.912	73.4	0.0108
TCZ W24 vs BL ONLY	MARS2	methionyl-tRNA synthetase 2, mitochondrial	0.406	1.78	0.33	-0.0355	1.78	0.929	-1.32	1.26	0.00916
TCZ W24 vs BL ONLY	MAT2B	methionine adenosyltransferase II, beta	-0.578	20.7	0.284	-0.00973	17.5	0.972	1.22	39.2	0.0139
TCZ W24 vs BL ONLY	MBD5	methyl-CpG binding domain protein 5	-0.915	1.49	0.0934	0.102	1.71	0.626	1.14	1.52	0.017
TCZ W24 vs BL ONLY	MBNL1	muscleblind-like splicing regulator 1	0.133	22.1	0.647	-0.057	21.4	0.706	-0.716	19.5	0.0174
TCZ W24 vs BL ONLY	MBOAT2	membrane bound O-acyltransferase domain containing 2	0.863	12	0.12	-0.0745	22.3	0.589	-0.597	9.5	0.0457
TCZ W24 vs BL ONLY	MCCC1	methylcrotonoyl-CoA carboxylase 1 (alpha)	-0.566	2.64	0.0444	0.175	2.55	0.289	0.636	3.17	0.0268
TCZ W24 vs BL ONLY	MCEE	methylmalonyl CoA epimerase	-0.354	2.6	0.731	0.00588	2.5	0.996	1.13	6.69	0.0305
TCZ W24 vs BL ONLY	MDFI	MyoD family inhibitor	2.21	1.11	0.106	0.0882	2.3	0.76	-2.83	1.06	0.0376
TCZ W24 vs BL ONLY	MED13	mediator complex subunit 13	0.54	9.21	0.409	-0.0677	12.8	0.587	-0.966	4.95	0.0143
TCZ W24 vs BL ONLY	MED14	mediator complex subunit 14	0.199	6.85	0.667	0.0225	7.85	0.915	-0.653	5.11	0.0496
TCZ W24 vs BL ONLY	MEDAG	mesenteric estrogen-dependent adipogenesis	-0.344	12.7	0.831	-0.0303	7.32	0.906	-1.8	5.38	0.00316
TCZ W24 vs BL ONLY	MEF2A	myocyte enhancer factor 2A	-0.16	6.02	0.841	-0.0697	5.88	0.606	-0.755	4.12	0.0183
TCZ W24 vs BL ONLY	MEF2D	myocyte enhancer factor 2D	0.196	11.8	0.698	0.0389	12	0.8	-0.81	7.97	0.0349
TCZ W24 vs BL ONLY	MESDC1	mesoderm development candidate 1	0.476	10	0.473	0.0432	11	0.811	-1.15	5.9	0.00489
TCZ W24 vs BL ONLY	MET	MET proto-oncogene, receptor tyrosine kinase	-0.0695	9.41	0.894	0.0404	9.8	0.782	-1.3	6.94	0.0113
TCZ W24 vs BL ONLY	METAP1D	methionyl aminopeptidase type 1D (mitochondrial)	-0.554	1.27	0.0795	-0.0279	1.21	0.975	0.606	1.54	0.0497
TCZ W24 vs BL ONLY	METRNL	meteorin, glial cell differentiation regulator-like	-0.157	41.9	0.869	0.00284	38.6	0.995	-1.21	25.9	0.0351
TCZ W24 vs BL ONLY	METTL1	methyltransferase like 1	0.469	10.4	0.132	-0.0798	10.3	0.69	-0.817	8.28	0.0128
TCZ W24 vs BL ONLY	METTL18	methyltransferase like 18	-0.356	1.78	0.425	-0.227	1.46	0.499	0.802	2.59	0.0448
TCZ W24 vs BL ONLY	METTL25	methyltransferase like 25	-0.236	1.46	0.717	-0.0995	1.32	0.802	0.803	2.13	0.0302
TCZ W24 vs BL ONLY	METTL7A	methyltransferase like 7A	-1.39	1.64	0.199	0.0551	0.769	0.883	1.44	3.78	0.00611
TCZ W24 vs BL ONLY	MEX3D	mex-3 RNA binding family member D	0.215	17	0.714	0.102	19.6	0.469	-0.638	9.47	0.0378
TCZ W24 vs BL ONLY	MFAP2	microfibrillar-associated protein 2	0.0454	97.3	0.929	-0.0607	97.9	0.587	-0.706	74.5	0.022
TCZ W24 vs BL ONLY	MFAP3	microfibrillar-associated protein 3	0.269	10.4	0.338	-0.0704	12.1	0.533	-0.654	8.6	0.0134
TCZ W24 vs BL ONLY	MGARP	mitochondria-localized glutamic acid-rich protein	-1.03	2.65	0.0828	0.257	1.24	0.493	1.22	3.72	0.0128
TCZ W24 vs BL ONLY	MGME1	mitochondrial genome maintenance exonuclease 1	-0.394	2.57	0.35	0.106	2.63	0.631	0.71	3.35	0.0183
TCZ W24 vs BL ONLY	MICAL2	microtubule associated monooxygenase, calponin and LIM domain containing 2	0.912	81.7	0.105	-0.141	87.9	0.137	-1.78	53.7	0.00678
TCZ W24 vs BL ONLY	MICAL3	microtubule associated monooxygenase, calponin and LIM domain containing 3	0.432	4.04	0.3	0.0343	3.98	0.841	-1.11	3.2	0.00941
TCZ W24 vs BL ONLY	MICALL1	MICAL-like 1	0.428	16.9	0.442	-0.0036	18.8	0.991	-1.14	10.8	0.00874
TCZ W24 vs BL ONLY	MIER2	mesoderm induction early response 1, family member 2	0.38	10.2	0.346	0.0376	9.82	0.87	-0.787	7.35	0.0276
TCZ W24 vs BL ONLY	MINPP1	multiple inositol-polyphosphate phosphatase 1	0.196	13	0.681	-0.0943	11.9	0.529	-0.863	11.9	0.0185
TCZ W24 vs BL ONLY	MKL1	megakaryoblastic leukemia (translocation) 1	0.94	16.1	0.0946	0.0515	21	0.632	-1.15	11.7	0.00496
TCZ W24 vs BL ONLY	MKNK2	MAP kinase interacting serine/threonine kinase 2	-0.566	8.39	0.0693	0.0632	9.45	0.666	0.672	8.54	0.0155
TCZ W24 vs BL ONLY	MKS1	Meckel syndrome, type 1	-0.433	1.88	0.488	0.24	2.23	0.277	0.93	2.01	0.0364
TCZ W24 vs BL ONLY	MLH3	mutL homolog 3	-0.124	1.08	0.744	0.0857	1.17	0.713	0.662	1.42	0.0184
TCZ W24 vs BL ONLY	MLKL	mixed lineage kinase domain-like	-1.01	2.5	0.065	0.0719	2.11	0.797	0.628	2.42	0.0288
TCZ W24 vs BL ONLY	MLLT3	myeloid/lymphoid or mixed-lineage leukemia (trithorax homolog, Drosophila); translocated to, 3	-0.497	0.99	0.334	0.094	1.03	0.75	1.06	1.15	0.0266
TCZ W24 vs BL ONLY	MMP10	matrix metallopeptidase 10 (stromelysin 2)	2.36	1.27	0.135	-0.107	2.1	0.813	-1.64	3.63	0.007
TCZ W24 vs BL ONLY	MMP12	matrix metallopeptidase 12 (macrophage elastase)	2.94	1.56	0.0816	-0.148	1.65	0.675	-1.31	1.44	0.00342
TCZ W24 vs BL ONLY	MMP3	matrix metallopeptidase 3 (stromelysin 1, progelatinase)	1.25	103	0.247	0.0125	175	0.944	-1.22	85	0.014
TCZ W24 vs BL ONLY	MMRN2	multimerin 2	-1.46	0.956	0.221	0.202	0.405	0.508	1.18	1.89	0.0166
TCZ W24 vs BL ONLY	MOB1B	MOB kinase activator 1B	0.832	5.82	0.115	-0.112	6	0.53	-1.29	4.2	0.0162
TCZ W24 vs BL ONLY	MOCOS	molybdenum cofactor sulfurase	-0.723	4.01	0.486	0.125	4.01	0.463	0.925	2.04	0.0139
TCZ W24 vs BL ONLY	MOCS3	molybdenum cofactor synthesis 3	0.209	3.96	0.561	-0.051	3.83	0.802	-0.742	2.81	0.0125
TCZ W24 vs BL ONLY	MPHOSPH10	M-phase phosphoprotein 10 (U3 small nucleolar ribonucleoprotein)	0.454	9.44	0.0536	-0.000402	10.2	0.999	-0.728	7.84	0.0187
TCZ W24 vs BL ONLY	MPZL1	myelin protein zero-like 1	0.206	35.1	0.547	-0.0362	35.5	0.769	-0.617	31.7	0.014
TCZ W24 vs BL ONLY	MR1	major histocompatibility complex, class I-related	-0.368	3.9	0.0949	0.0367	3.72	0.817	0.742	4.36	0.0225
TCZ W24 vs BL ONLY	MRTO4	mRNA turnover 4 homolog (S. cerevisiae)	0.519	12.7	0.0476	-0.0518	12.5	0.736	-0.704	12.9	0.0239
TCZ W24 vs BL ONLY	MSC	musculin	0.509	30	0.416	-0.0743	33.4	0.587	-0.787	22.9	0.0202
TCZ W24 vs BL ONLY	MSN	moesin	0.658	193	0.0549	-0.0331	181	0.758	-1.05	141	0.00706
TCZ W24 vs BL ONLY	MSRB3	methionine sulfoxide reductase B3	0.451	40.5	0.212	-0.0452	37.9	0.706	-0.889	38.2	0.0102
TCZ W24 vs BL ONLY	MT1G	metallothionein 1G	-0.662	0.365	0.834	0	0.122	1	1.22	1.58	0.0489
TCZ W24 vs BL ONLY	MT1M	metallothionein 1M	-1.04	8.51	0.282	0.106	4.2	0.801	0.951	17	0.0367
TCZ W24 vs BL ONLY	MTAP	methylthioadenosine phosphorylase	0.746	11.1	0.0923	-0.117	10.8	0.27	-1.4	5.93	0.00733
TCZ W24 vs BL ONLY	MTERF2	mitochondrial transcription termination factor 2	-0.811	0.873	0.0923	-0.141	0.75	0.795	1.36	1.26	0.00947
TCZ W24 vs BL ONLY	MTHFR	methylenetetrahydrofolate reductase (NAD(P)H)	-0.367	1.32	0.315	-0.0403	1.37	0.871	1.27	1.68	0.00409
TCZ W24 vs BL ONLY	MTHFSD	methenyltetrahydrofolate synthetase domain containing	-0.353	1.75	0.156	0.0522	1.87	0.864	0.606	1.71	0.0222
TCZ W24 vs BL ONLY	MTMR4	myotubularin related protein 4	-0.684	1.9	0.114	0.0449	1.89	0.846	1.23	2.51	0.00698
TCZ W24 vs BL ONLY	MTMR9	myotubularin related protein 9	0.697	4.73	0.0556	-0.0964	5.75	0.479	-0.967	3.18	0.0144
TCZ W24 vs BL ONLY	MTRR	5-methyltetrahydrofolate-homocysteine methyltransferase reductase	0.134	10.8	0.614	-0.103	10.2	0.452	-0.628	8.37	0.0129
TCZ W24 vs BL ONLY	MTSS1	metastasis suppressor 1	1.25	1.88	0.335	-0.228	1.51	0.12	-1.19	2.24	0.0393
TCZ W24 vs BL ONLY	MYADM	myeloid-associated differentiation marker	0.268	79.9	0.628	0.000725	88.1	0.998	-1.32	63.4	0.00457
TCZ W24 vs BL ONLY	MYBBP1A	MYB binding protein (P160) 1a	0.545	16.5	0.231	-0.0367	18.1	0.796	-0.966	10.9	0.0225
TCZ W24 vs BL ONLY	MYBL1	v-myb avian myeloblastosis viral oncogene homolog-like 1	-1.33	0.827	0.0362	0.0293	0.813	0.951	1.24	1.26	0.0221
TCZ W24 vs BL ONLY	MYC	v-myc avian myelocytomatosis viral oncogene homolog	0.871	37.4	0.0794	-0.103	42.1	0.429	-1.17	21.2	0.00461
TCZ W24 vs BL ONLY	MYH10	myosin, heavy chain 10, non-muscle	0.471	30	0.53	-0.0486	34.1	0.631	-0.916	13.9	0.033
TCZ W24 vs BL ONLY	MYH9	myosin, heavy chain 9, non-muscle	0.983	309	0.14	0.044	399	0.672	-0.765	226	0.0431
TCZ W24 vs BL ONLY	MYLIP	myosin regulatory light chain interacting protein	-2.15	0.796	0.00076	0.208	0.652	0.686	1.08	1.22	0.0324
TCZ W24 vs BL ONLY	MYO1D	myosin ID	0.448	57.3	0.859	-0.0409	138	0.697	-0.964	14.7	0.0379
TCZ W24 vs BL ONLY	MYO1E	myosin IE	0.658	13.9	0.272	-0.00478	16.4	0.984	-1.4	8.1	0.00874
TCZ W24 vs BL ONLY	MYO6	myosin VI	0.595	6.11	0.124	-0.0268	7.3	0.888	-0.723	4.87	0.0416
TCZ W24 vs BL ONLY	MYO9B	myosin IXB	0.898	32.7	0.0701	0.00346	36.6	0.989	-1.14	20.9	0.015
TCZ W24 vs BL ONLY	MYOCD	myocardin	3.58	1.21	0.29	0.174	1.22	0.461	-2.57	3.45	0.00169
TCZ W24 vs BL ONLY	NAA15	N(alpha)-acetyltransferase 15, NatA auxiliary subunit	0.307	9.85	0.304	-0.0322	9.25	0.826	-0.76	8.82	0.00504
TCZ W24 vs BL ONLY	NABP1	nucleic acid binding protein 1	-0.0285	5.41	0.975	-0.0367	4.14	0.87	1.1	8.77	0.0219
TCZ W24 vs BL ONLY	NAF1	nuclear assembly factor 1 ribonucleoprotein	0.129	4.16	0.785	0.0575	4.45	0.792	-0.7	3.13	0.0111
TCZ W24 vs BL ONLY	NANOS3	nanos homolog 3 (Drosophila)	1.57	0.979	0.0338	0.222	0.804	0.779	-1.08	1.15	0.028
TCZ W24 vs BL ONLY	NANS	N-acetylneuraminic acid synthase	0.415	28.8	0.107	-0.019	30.3	0.917	-0.629	24.1	0.0187
TCZ W24 vs BL ONLY	NAT6	N-acetyltransferase 6 (GCN5-related)	-0.154	3.04	0.759	0.188	3.1	0.429	0.647	4.17	0.0243
TCZ W24 vs BL ONLY	NATD1	N-acetyltransferase domain containing 1	-0.724	2.55	0.0804	0.127	2.81	0.473	0.916	2.48	0.0114
TCZ W24 vs BL ONLY	NAV3	neuron navigator 3	0.623	4.93	0.375	-0.0639	5.14	0.716	-1.39	3.1	0.0125
TCZ W24 vs BL ONLY	NCF2	neutrophil cytosolic factor 2	2.11	0.357	0.272	0.115	0.423	0.827	-1.87	1.03	0.00586
TCZ W24 vs BL ONLY	NCKAP1	NCK-associated protein 1	0.372	56	0.101	-0.044	59.9	0.774	-0.814	48.7	0.015
TCZ W24 vs BL ONLY	NCKIPSD	NCK interacting protein with SH3 domain	-0.0221	3.65	0.979	0.0484	3.71	0.864	0.61	4.46	0.0192
TCZ W24 vs BL ONLY	NCOA2	nuclear receptor coactivator 2	-0.735	2.48	0.142	0.0578	2.75	0.72	0.803	1.77	0.0278
TCZ W24 vs BL ONLY	NCOR2	nuclear receptor corepressor 2	0.28	34.1	0.666	0.144	36.8	0.279	-1.1	22.5	0.0384
TCZ W24 vs BL ONLY	NCS1	neuronal calcium sensor 1	0.625	19.9	0.235	-0.027	19.1	0.859	-1.09	13.9	0.00702
TCZ W24 vs BL ONLY	NDEL1	nudE neurodevelopment protein 1-like 1	0.462	24	0.106	0.00791	23.9	0.968	-0.843	21.5	0.00634
TCZ W24 vs BL ONLY	NDRG1	N-myc downstream regulated 1	0.0561	65.3	0.942	0.0221	76.7	0.864	-0.949	41.9	0.0137
TCZ W24 vs BL ONLY	NDRG4	NDRG family member 4	0.0197	1.14	0.987	0.00603	1.06	0.992	0.624	1.57	0.035
TCZ W24 vs BL ONLY	NDST1	N-deacetylase/N-sulfotransferase (heparan glucosaminyl) 1	0.334	55.6	0.686	0.0319	85.3	0.77	-0.789	36.3	0.0294
TCZ W24 vs BL ONLY	NEK3	NIMA-related kinase 3	-0.236	1.38	0.648	0.0307	1.33	0.949	0.834	2.35	0.0232
TCZ W24 vs BL ONLY	NEK7	NIMA-related kinase 7	-0.0218	110	0.986	0.0261	117	0.916	-0.763	63.7	0.0265
TCZ W24 vs BL ONLY	NET1	neuroepithelial cell transforming 1	0.912	20.3	0.288	-0.0482	38.3	0.676	-1.46	8.75	0.00678
TCZ W24 vs BL ONLY	NEURL2	neuralized E3 ubiquitin protein ligase 2	-0.433	0.896	0.506	-0.0919	0.651	0.898	0.924	1.36	0.0241
TCZ W24 vs BL ONLY	NF2	neurofibromin 2 (merlin)	0.516	10.8	0.262	-0.0785	13.5	0.469	-0.63	7.03	0.0462
TCZ W24 vs BL ONLY	NFATC1	nuclear factor of activated T-cells, cytoplasmic, calcineurin-dependent 1	0.408	5.36	0.666	-0.0491	5.15	0.784	-1.74	2.45	0.00902
TCZ W24 vs BL ONLY	NFATC4	nuclear factor of activated T-cells, cytoplasmic, calcineurin-dependent 4	-0.599	13.6	0.172	0.0861	16.8	0.394	0.643	12.6	0.0136
TCZ W24 vs BL ONLY	NFKB1	nuclear factor of kappa light polypeptide gene enhancer in B-cells 1	0.0233	25.9	0.985	-0.15	24.4	0.132	-1.03	12.6	0.0399
TCZ W24 vs BL ONLY	NHLRC3	NHL repeat containing 3	-0.572	1.48	0.0883	-0.0309	1.33	0.943	0.623	1.98	0.0417
TCZ W24 vs BL ONLY	NIP7	NIP7, nucleolar pre-rRNA processing protein	0.31	16.2	0.328	-0.0764	15.1	0.591	-0.935	13	0.00749
TCZ W24 vs BL ONLY	NKRF	NFKB repressing factor	0.366	2.86	0.297	-0.058	2.83	0.808	-0.825	1.97	0.00962
TCZ W24 vs BL ONLY	NKX3-1	NK3 homeobox 1	0.0826	5.24	0.955	-0.169	4.65	0.328	-0.77	3.67	0.0459
TCZ W24 vs BL ONLY	NMI	N-myc (and STAT) interactor	-0.855	8.5	0.0692	0.0403	6.99	0.904	0.844	11.8	0.0165
TCZ W24 vs BL ONLY	NMRK1	nicotinamide riboside kinase 1	-0.817	2.3	0.105	-0.0375	2.14	0.918	0.941	3.97	0.0204
TCZ W24 vs BL ONLY	NNMT	nicotinamide N-methyltransferase	0.71	239	0.059	-0.0924	257	0.469	-0.686	221	0.0367
TCZ W24 vs BL ONLY	NOC2L	nucleolar complex associated 2 homolog (S. cerevisiae)	0.504	16.7	0.188	0.000167	18	0.999	-0.834	11.5	0.0145
TCZ W24 vs BL ONLY	NOC4L	nucleolar complex associated 4 homolog (S. cerevisiae)	0.296	8.16	0.241	-0.00782	8.7	0.987	-0.618	6.14	0.018
TCZ W24 vs BL ONLY	NOL3	nucleolar protein 3 (apoptosis repressor with CARD domain)	-0.497	2.24	0.0994	0.102	1.73	0.779	0.867	2.75	0.00636
TCZ W24 vs BL ONLY	NOL6	nucleolar protein 6 (RNA-associated)	0.686	16.4	0.0971	-0.0629	19.6	0.628	-0.773	10.3	0.03
TCZ W24 vs BL ONLY	NOLC1	nucleolar and coiled-body phosphoprotein 1	0.372	18	0.507	-0.0818	18.8	0.429	-0.941	10.6	0.0159
TCZ W24 vs BL ONLY	NOP14	NOP14 nucleolar protein	0.507	11.2	0.172	-0.0332	11.4	0.814	-0.794	8.24	0.0179
TCZ W24 vs BL ONLY	NOP16	NOP16 nucleolar protein	0.851	9.43	0.0815	-0.0744	9.44	0.697	-1.5	7.35	0.00382
TCZ W24 vs BL ONLY	NOP2	NOP2 nucleolar protein	0.487	11.4	0.336	-0.00396	11.7	0.991	-1.09	7.54	0.0163
TCZ W24 vs BL ONLY	NOP56	NOP56 ribonucleoprotein	0.465	28.6	0.0892	-0.0218	30	0.896	-0.785	27	0.0104
TCZ W24 vs BL ONLY	NOTCH2	notch 2	0.45	33.9	0.444	-0.0184	42.9	0.916	-1.37	17.7	0.0197
TCZ W24 vs BL ONLY	NOV	nephroblastoma overexpressed	-0.819	2.47	0.481	0.0268	1.47	0.949	0.693	5.41	0.0212
TCZ W24 vs BL ONLY	NPAS1	neuronal PAS domain protein 1	0.404	7.92	0.809	0.175	11	0.145	-0.706	2.19	0.0139
TCZ W24 vs BL ONLY	NPAS2	neuronal PAS domain protein 2	1.16	6.8	0.176	-0.132	6.49	0.507	-1.54	4.96	0.0323
TCZ W24 vs BL ONLY	NPC1	Niemann-Pick disease, type C1	0.13	5.54	0.901	-0.0174	9.04	0.931	-0.779	4.02	0.00972
TCZ W24 vs BL ONLY	NPR3	natriuretic peptide receptor 3	0.626	5.72	0.668	-0.000215	8.13	0.999	-1.03	2.84	0.0115
TCZ W24 vs BL ONLY	NPTN	neuroplastin	0.499	31.5	0.123	-0.02	29.3	0.919	-0.629	32.4	0.0335
TCZ W24 vs BL ONLY	NPW	neuropeptide W	0.218	1.97	0.869	0.247	1.96	0.537	-1.13	2.48	0.0113
TCZ W24 vs BL ONLY	NR1H3	nuclear receptor subfamily 1, group H, member 3	-0.454	3.24	0.592	0.112	1.93	0.69	0.628	6.36	0.0184
TCZ W24 vs BL ONLY	NR3C1	nuclear receptor subfamily 3, group C, member 1 (glucocorticoid receptor)	-0.547	24.6	0.268	-0.122	22.9	0.229	-0.927	17.4	0.0198
TCZ W24 vs BL ONLY	NR4A1	nuclear receptor subfamily 4, group A, member 1	1.52	6.24	0.212	-0.146	5.56	0.499	-3.03	2.19	0.00338
TCZ W24 vs BL ONLY	NRAS	neuroblastoma RAS viral (v-ras) oncogene homolog	0.404	20.3	0.0736	-0.0796	22.9	0.429	-0.661	19	0.0205
TCZ W24 vs BL ONLY	NREP	neuronal regeneration related protein	0.651	42.6	0.204	8.25e-05	55.7	1	-1.13	32.3	0.00487
TCZ W24 vs BL ONLY	NRG1	neuregulin 1	1.13	10.9	0.197	-0.00587	17.1	0.982	-1.62	5.95	0.0098
TCZ W24 vs BL ONLY	NRIP3	nuclear receptor interacting protein 3	0.554	2.88	0.0963	-0.0977	3.11	0.628	-1.08	2.6	0.00533
TCZ W24 vs BL ONLY	NRP1	neuropilin 1	-0.789	50.2	0.163	0.0126	52.7	0.939	0.744	38.5	0.0243
TCZ W24 vs BL ONLY	NRP2	neuropilin 2	0.932	19.9	0.115	-0.0278	26.2	0.836	-1.22	15.2	0.0128
TCZ W24 vs BL ONLY	NSL1	NSL1, MIS12 kinetochore complex component	-0.291	1.2	0.715	0.0259	1.19	0.916	1	2.17	0.0274
TCZ W24 vs BL ONLY	NSMCE4A	non-SMC element 4 homolog A (S. cerevisiae)	-0.686	2.81	0.142	-0.0433	2.28	0.897	1.13	4.61	0.0163
TCZ W24 vs BL ONLY	NSUN2	NOP2/Sun RNA methyltransferase family, member 2	0.536	19.2	0.137	-0.0332	19	0.809	-0.997	14.6	0.00658
TCZ W24 vs BL ONLY	NT5DC1	5'-nucleotidase domain containing 1	-0.398	2.8	0.604	-0.0251	1.41	0.949	0.688	4.76	0.0276
TCZ W24 vs BL ONLY	NTHL1	nth endonuclease III-like 1 (E. coli)	-0.839	3.66	0.0679	0.0463	2.86	0.921	0.983	4.56	0.0225
TCZ W24 vs BL ONLY	NTPCR	nucleoside-triphosphatase, cancer-related	-0.621	12.5	0.375	0.0892	10.2	0.592	1.14	32.2	0.0198
TCZ W24 vs BL ONLY	NUAK2	NUAK family, SNF1-like kinase, 2	1.84	3.61	0.0726	-0.0995	3.59	0.595	-1.96	2.01	0.0125
TCZ W24 vs BL ONLY	NUDCD1	NudC domain containing 1	0.451	9.09	0.114	-0.0985	8.39	0.525	-0.767	7.08	0.0113
TCZ W24 vs BL ONLY	NUDT12	nudix (nucleoside diphosphate linked moiety X)-type motif 12	-0.201	1.85	0.821	0.0846	1.94	0.786	0.985	3.44	0.0136
TCZ W24 vs BL ONLY	NUDT14	nudix (nucleoside diphosphate linked moiety X)-type motif 14	0.0612	1.11	0.957	-0.165	0.888	0.764	0.661	1.82	0.0429
TCZ W24 vs BL ONLY	NUDT19	nudix (nucleoside diphosphate linked moiety X)-type motif 19	0.156	4.3	0.743	0.0419	4.86	0.83	-0.649	3.14	0.0159
TCZ W24 vs BL ONLY	NUDT6	nudix (nucleoside diphosphate linked moiety X)-type motif 6	1.02	60.2	0.253	-0.0719	64.9	0.649	-1.85	28	0.00493
TCZ W24 vs BL ONLY	NUDT7	nudix (nucleoside diphosphate linked moiety X)-type motif 7	-0.967	0.851	0.211	0.388	0.563	0.433	0.971	1.59	0.0137
TCZ W24 vs BL ONLY	NUFIP1	nuclear fragile X mental retardation protein interacting protein 1	0.513	2.01	0.107	-0.156	1.93	0.446	-0.595	1.43	0.0203
TCZ W24 vs BL ONLY	NUP188	nucleoporin 188kDa	0.18	17.2	0.766	-0.0551	17.2	0.641	-0.8	9.02	0.0449
TCZ W24 vs BL ONLY	NUP37	nucleoporin 37kDa	-0.124	8.71	0.901	0.0118	8.89	0.975	1.08	18.3	0.0448
TCZ W24 vs BL ONLY	NUP98	nucleoporin 98kDa	0.216	16.2	0.684	-0.0508	16.5	0.644	-0.653	10.5	0.0339
TCZ W24 vs BL ONLY	NUPL1	nucleoporin like 1	0.419	10.4	0.0558	-0.0583	9.89	0.639	-0.941	9.22	0.00368
TCZ W24 vs BL ONLY	OARD1	O-acyl-ADP-ribose deacylase 1	-0.41	3.69	0.456	0.0836	3.43	0.795	1.03	5.54	0.00916
TCZ W24 vs BL ONLY	OAS1	2'-5'-oligoadenylate synthetase 1, 40/46kDa	-1.9	19	0.3	-0.273	15.4	0.408	0.592	16.4	0.037
TCZ W24 vs BL ONLY	OASL	2'-5'-oligoadenylate synthetase-like	-1.95	8.38	0.176	-0.102	8.38	0.827	0.938	7.55	0.0124
TCZ W24 vs BL ONLY	OBFC1	oligonucleotide/oligosaccharide-binding fold containing 1	-0.689	1.38	0.0901	0.0701	1.35	0.76	0.681	1.85	0.0279
TCZ W24 vs BL ONLY	OLFML2B	olfactomedin-like 2B	0.572	6.15	0.525	0.0236	15.5	0.911	-1.05	4.39	0.00644
TCZ W24 vs BL ONLY	OLR1	oxidized low density lipoprotein (lectin-like) receptor 1	2.2	1.34	0.151	0.0319	1.25	0.95	-1.5	2.59	0.00707
TCZ W24 vs BL ONLY	OPN1SW	opsin 1 (cone pigments), short-wave-sensitive	0.572	2.36	0.177	0.0843	3.49	0.799	-0.753	1.95	0.0273
TCZ W24 vs BL ONLY	ORAI2	ORAI calcium release-activated calcium modulator 2	0.275	7.01	0.496	-0.0173	8.17	0.918	-0.628	5.05	0.0463
TCZ W24 vs BL ONLY	ORAI3	ORAI calcium release-activated calcium modulator 3	-0.633	5.79	0.143	0.0946	5.12	0.661	0.994	7.39	0.00731
TCZ W24 vs BL ONLY	ORC4	origin recognition complex, subunit 4	-0.259	2	0.607	0.00261	1.93	0.995	0.757	2.88	0.0371
TCZ W24 vs BL ONLY	OSBPL10	oxysterol binding protein-like 10	-0.0173	1.47	0.99	-0.0526	1.04	0.871	-1.21	1.17	0.0289
TCZ W24 vs BL ONLY	OSBPL3	oxysterol binding protein-like 3	0.0676	8.63	0.885	-0.029	8.97	0.86	-0.823	5.42	0.02
TCZ W24 vs BL ONLY	OSBPL6	oxysterol binding protein-like 6	0.326	1.84	0.335	-0.0309	1.97	0.921	-1.2	1.75	0.0372
TCZ W24 vs BL ONLY	OSBPL7	oxysterol binding protein-like 7	-0.375	0.997	0.525	0.217	0.997	0.417	1.04	1.75	0.00674
TCZ W24 vs BL ONLY	OSCP1	organic solute carrier partner 1	-0.182	1.93	0.759	0.0671	1.96	0.859	0.797	3.56	0.0339
TCZ W24 vs BL ONLY	OSGEPL1	O-sialoglycoprotein endopeptidase-like 1	-0.317	0.638	0.765	0.0512	0.576	0.95	1.2	1.28	0.0196
TCZ W24 vs BL ONLY	OSGIN1	oxidative stress induced growth inhibitor 1	-1.4	2.04	0.113	0.0423	2.08	0.918	1.83	5.43	0.0116
TCZ W24 vs BL ONLY	OSGIN2	oxidative stress induced growth inhibitor family member 2	0.45	4	0.194	-0.105	4.18	0.561	-0.648	3.22	0.0241
TCZ W24 vs BL ONLY	OSR1	odd-skipped related transciption factor 1	-1.02	2.41	0.0584	0.0765	1.57	0.845	1.66	4.3	0.00308
TCZ W24 vs BL ONLY	OTUD7B	OTU deubiquitinase 7B	0.467	5.56	0.443	-0.0419	6.24	0.766	-0.756	3.27	0.0358
TCZ W24 vs BL ONLY	OTULIN	OTU deubiquitinase with linear linkage specificity	-0.0025	3.07	0.995	-0.000419	3.1	0.999	-0.667	2.22	0.0388
TCZ W24 vs BL ONLY	OXLD1	oxidoreductase-like domain containing 1	-0.162	6.94	0.746	0.152	7.12	0.612	0.653	10.9	0.0383
TCZ W24 vs BL ONLY	OXTR	oxytocin receptor	1.39	37.7	0.249	-0.0204	77.1	0.924	-1.96	21.3	0.00385
TCZ W24 vs BL ONLY	P4HA2	prolyl 4-hydroxylase, alpha polypeptide II	0.625	67.3	0.11	-0.00553	104	0.979	-0.646	53.5	0.0228
TCZ W24 vs BL ONLY	PABPC1L	poly(A) binding protein, cytoplasmic 1-like	-0.0827	0.999	0.961	0.158	0.475	0.759	0.969	1.64	0.0113
TCZ W24 vs BL ONLY	PACS1	phosphofurin acidic cluster sorting protein 1	0.424	34.4	0.284	0.00497	48.2	0.984	-0.669	25.1	0.0407
TCZ W24 vs BL ONLY	PAK2	p21 protein (Cdc42/Rac)-activated kinase 2	0.435	14	0.198	-0.0748	16.2	0.491	-0.698	9.8	0.0123
TCZ W24 vs BL ONLY	PALLD	palladin, cytoskeletal associated protein	1.32	87	0.0817	0.0407	95.2	0.721	-1.1	95.8	0.01
TCZ W24 vs BL ONLY	PALM	paralemmin	0.602	2.21	0.673	0.085	2.36	0.763	-0.799	4.08	0.0295
TCZ W24 vs BL ONLY	PALM2	paralemmin 2	1.21	2.52	0.0812	-0.119	2.61	0.452	-2.29	1.42	0.00847
TCZ W24 vs BL ONLY	PAN2	PAN2 poly(A) specific ribonuclease subunit	-0.521	1.55	0.219	0.0301	1.55	0.929	0.822	1.74	0.0154
TCZ W24 vs BL ONLY	PANK3	pantothenate kinase 3	0.319	8.63	0.479	-0.0901	12.7	0.5	-0.73	6.42	0.0176
TCZ W24 vs BL ONLY	PANX1	pannexin 1	0.792	15.2	0.23	-0.119	14.5	0.23	-0.976	10.7	0.0254
TCZ W24 vs BL ONLY	PAPD7	PAP associated domain containing 7	0.283	6.69	0.503	-0.0218	6.81	0.918	-0.828	5.09	0.0301
TCZ W24 vs BL ONLY	PARP10	poly (ADP-ribose) polymerase family, member 10	-0.979	14.2	0.199	0.0338	14.3	0.897	0.676	15.3	0.0185
TCZ W24 vs BL ONLY	PARP16	poly (ADP-ribose) polymerase family, member 16	0.0153	1.01	0.985	0.184	1.66	0.429	0.636	1.03	0.044
TCZ W24 vs BL ONLY	PBRM1	polybromo 1	0.311	9.47	0.3	-0.00938	10.6	0.967	-0.59	6.99	0.0377
TCZ W24 vs BL ONLY	PCDH10	protocadherin 10	5.47	3.46	0.157	-0.00709	5.05	0.986	-1.82	2.12	0.0055
TCZ W24 vs BL ONLY	PCDH18	protocadherin 18	-1.37	46	0.197	0.0578	49.5	0.68	1.73	39.1	0.0182
TCZ W24 vs BL ONLY	PCDH7	protocadherin 7	1.43	4.09	0.238	-0.149	3.82	0.237	-1.04	3.03	0.0253
TCZ W24 vs BL ONLY	PCDH9	protocadherin 9	2.43	1.45	0.091	-0.0588	4.94	0.719	-2.09	1.07	0.00405
TCZ W24 vs BL ONLY	PCNA	proliferating cell nuclear antigen	-0.56	26	0.487	-0.0815	21.8	0.651	1.21	53	0.031
TCZ W24 vs BL ONLY	PCNT	pericentrin	-0.397	2.07	0.359	0.0698	2.2	0.635	0.603	1.6	0.0198
TCZ W24 vs BL ONLY	PCNX	pecanex homolog (Drosophila)	0.656	8.7	0.351	-0.0803	12.8	0.467	-0.913	5.05	0.0233
TCZ W24 vs BL ONLY	PDCD11	programmed cell death 11	0.706	10.6	0.215	-0.0525	11.4	0.635	-1.02	5.52	0.0278
TCZ W24 vs BL ONLY	PDCD1LG2	programmed cell death 1 ligand 2	1.11	17.2	0.129	-0.199	12.7	0.165	-1.65	11	0.0046
TCZ W24 vs BL ONLY	PDE12	phosphodiesterase 12	0.521	7.17	0.133	-0.103	7.18	0.354	-0.978	4.84	0.00405
TCZ W24 vs BL ONLY	PDE1C	phosphodiesterase 1C, calmodulin-dependent 70kDa	-0.963	1.78	0.393	-0.000508	1.02	0.999	0.597	2.25	0.0268
TCZ W24 vs BL ONLY	PDE5A	phosphodiesterase 5A, cGMP-specific	0.136	2.48	0.959	-0.00525	1.97	0.992	1.12	23.6	0.0153
TCZ W24 vs BL ONLY	PDE8A	phosphodiesterase 8A	0.479	7.12	0.272	-0.0831	9.47	0.493	-0.657	5.3	0.0128
TCZ W24 vs BL ONLY	PDGFA	platelet-derived growth factor alpha polypeptide	1.71	3.74	0.106	0.0355	3.66	0.867	-3.22	1.91	0.00504
TCZ W24 vs BL ONLY	PDGFC	platelet derived growth factor C	0.162	31	0.768	-0.0512	30.7	0.671	-0.733	25.7	0.0356
TCZ W24 vs BL ONLY	PDLIM3	PDZ and LIM domain 3	0.718	1.37	0.787	-0.0847	0.812	0.836	-1.08	2.16	0.0168
TCZ W24 vs BL ONLY	PDLIM5	PDZ and LIM domain 5	0.983	13.7	0.0619	-0.0721	15.5	0.55	-1.95	10.9	0.00308
TCZ W24 vs BL ONLY	PDZD8	PDZ domain containing 8	0.196	8.21	0.738	0.00368	11.2	0.991	-0.741	5.24	0.0195
TCZ W24 vs BL ONLY	PER2	period circadian clock 2	-0.0558	2.21	0.942	-0.0464	2.43	0.803	-0.638	1.52	0.0324
TCZ W24 vs BL ONLY	PES1	pescadillo ribosomal biogenesis factor 1	0.364	24.4	0.274	0.00603	26.9	0.983	-0.754	17.4	0.0177
TCZ W24 vs BL ONLY	PEX11A	peroxisomal biogenesis factor 11 alpha	-0.875	0.974	0.148	0.181	0.882	0.623	1.4	1.68	0.00799
TCZ W24 vs BL ONLY	PEX13	peroxisomal biogenesis factor 13	0.574	5.83	0.0258	-0.0343	5.89	0.869	-0.656	5.24	0.0134
TCZ W24 vs BL ONLY	PEX2	peroxisomal biogenesis factor 2	-0.458	5.21	0.559	0.0546	4.96	0.77	1.13	11.9	0.0295
TCZ W24 vs BL ONLY	PFKFB3	6-phosphofructo-2-kinase/fructose-2,6-biphosphatase 3	1.16	14.3	0.205	-0.0193	14.1	0.918	-1.92	11.4	0.00862
TCZ W24 vs BL ONLY	PGPEP1	pyroglutamyl-peptidase I	-0.645	2.45	0.409	0.0157	0.994	0.967	0.988	3.32	0.00525
TCZ W24 vs BL ONLY	PGRMC2	progesterone receptor membrane component 2	0.596	42	0.18	0.00689	53	0.98	-1.03	37.6	0.0118
TCZ W24 vs BL ONLY	PHAX	phosphorylated adaptor for RNA export	0.273	10.3	0.347	-0.0185	10.9	0.916	-0.589	7.95	0.0289
TCZ W24 vs BL ONLY	PHF11	PHD finger protein 11	-0.609	7.19	0.148	-0.0241	4.57	0.927	0.629	9.54	0.0386
TCZ W24 vs BL ONLY	PHF20L1	PHD finger protein 20-like 1	0.54	5.8	0.0213	0.0185	6.52	0.926	-0.602	4.84	0.0304
TCZ W24 vs BL ONLY	PHLDA1	pleckstrin homology-like domain, family A, member 1	-2	15.4	0.0665	-0.043	3.39	0.818	1.69	27.7	0.0157
TCZ W24 vs BL ONLY	PHLDA2	pleckstrin homology-like domain, family A, member 2	0.689	48.2	0.327	-0.0176	40.7	0.961	-1.45	40.6	0.00324
TCZ W24 vs BL ONLY	PHLDB1	pleckstrin homology-like domain, family B, member 1	0.769	42	0.243	0.068	44.8	0.462	-1.48	32.7	0.00798
TCZ W24 vs BL ONLY	PHLDB2	pleckstrin homology-like domain, family B, member 2	0.723	5.36	0.103	-0.0181	6.21	0.933	-0.901	3.53	0.0136
TCZ W24 vs BL ONLY	PHLPP2	PH domain and leucine rich repeat protein phosphatase 2	-0.294	2.7	0.643	-0.0662	2.82	0.674	-0.657	1.74	0.0431
TCZ W24 vs BL ONLY	PHYHD1	phytanoyl-CoA dioxygenase domain containing 1	-0.644	4.06	0.212	-0.0406	2.95	0.909	0.598	4.99	0.0472
TCZ W24 vs BL ONLY	PICALM	phosphatidylinositol binding clathrin assembly protein	0.577	61.9	0.0857	-0.0466	64.5	0.653	-1.05	45	0.00406
TCZ W24 vs BL ONLY	PIDD1	p53-induced death domain protein 1	-0.716	3.04	0.135	0.0765	2.18	0.811	0.971	3.57	0.00352
TCZ W24 vs BL ONLY	PIEZO1	piezo-type mechanosensitive ion channel component 1	0.819	43.7	0.0958	0.0256	47	0.859	-0.853	32.6	0.0271
TCZ W24 vs BL ONLY	PIF1	PIF1 5'-to-3' DNA helicase	-0.294	0.744	0.771	0.216	0.684	0.605	1.13	1.83	0.00374
TCZ W24 vs BL ONLY	PIK3CD	phosphatidylinositol-4,5-bisphosphate 3-kinase, catalytic subunit delta	1.31	18.4	0.0862	-0.25	22.2	0.0604	-1.99	8.67	0.00441
TCZ W24 vs BL ONLY	PIK3IP1	phosphoinositide-3-kinase interacting protein 1	0.306	6.77	0.726	0.101	6.13	0.544	0.932	10.4	0.014
TCZ W24 vs BL ONLY	PIK3R3	phosphoinositide-3-kinase, regulatory subunit 3 (gamma)	-0.831	1.06	0.146	-0.0533	1.05	0.88	1.3	1.44	0.0101
TCZ W24 vs BL ONLY	PIP5K1A	phosphatidylinositol-4-phosphate 5-kinase, type I, alpha	0.81	16.6	0.05	-0.0143	22.2	0.929	-0.991	10.7	0.00374
TCZ W24 vs BL ONLY	PIP5K1C	phosphatidylinositol-4-phosphate 5-kinase, type I, gamma	0.327	26.5	0.429	0.0383	28.2	0.776	-0.771	16.8	0.0265
TCZ W24 vs BL ONLY	PIR	pirin (iron-binding nuclear protein)	-1.29	5.22	0.115	0.296	2.7	0.156	1.05	9.17	0.0272
TCZ W24 vs BL ONLY	PITPNM3	PITPNM family member 3	-0.362	2	0.705	-0.0876	1.64	0.631	-1.22	1.55	0.0113
TCZ W24 vs BL ONLY	PITX1	paired-like homeodomain 1	3.07	1.74	0.284	0.108	1.41	0.798	0.697	3.7	0.0278
TCZ W24 vs BL ONLY	PITX2	paired-like homeodomain 2	2.01	3.28	0.278	0.0482	11.8	0.724	-1.08	1.55	0.0237
TCZ W24 vs BL ONLY	PKDCC	protein kinase domain containing, cytoplasmic	0.00934	5.22	0.99	0.111	7.22	0.527	1.05	6.21	0.0344
TCZ W24 vs BL ONLY	PKNOX1	PBX/knotted 1 homeobox 1	0.361	6.29	0.0816	-0.021	7.06	0.911	-0.625	5.92	0.0154
TCZ W24 vs BL ONLY	PLA2G16	phospholipase A2, group XVI	-0.613	1.39	0.442	-0.0318	0.818	0.972	0.774	2.58	0.031
TCZ W24 vs BL ONLY	PLAUR	plasminogen activator, urokinase receptor	0.761	27.6	0.301	-0.0654	25.9	0.632	-2.02	19.2	0.00504
TCZ W24 vs BL ONLY	PLCB4	phospholipase C, beta 4	0.913	2.84	0.51	0.0268	2.06	0.918	-1.61	4.15	0.00379
TCZ W24 vs BL ONLY	PLEKHA4	pleckstrin homology domain containing, family A (phosphoinositide binding specific) member 4	-0.962	13	0.12	-0.0362	11.9	0.883	0.789	17	0.0119
TCZ W24 vs BL ONLY	PLEKHA5	pleckstrin homology domain containing, family A member 5	-0.464	1.87	0.0905	0.00362	1.94	0.994	0.969	1.89	0.0124
TCZ W24 vs BL ONLY	PLEKHA6	pleckstrin homology domain containing, family A member 6	-1.31	1.19	0.274	-0.0241	0.462	0.952	1.04	1.9	0.0125
TCZ W24 vs BL ONLY	PLEKHG4	pleckstrin homology domain containing, family G (with RhoGef domain) member 4	-0.884	2.87	0.071	0.136	1.88	0.469	0.745	3.44	0.0463
TCZ W24 vs BL ONLY	PLEKHO2	pleckstrin homology domain containing, family O member 2	-0.399	9.51	0.367	0.0203	7.51	0.922	1.15	13.2	0.0102
TCZ W24 vs BL ONLY	PLK3	polo-like kinase 3	0.636	21.4	0.111	-0.0512	22.5	0.734	-1.44	14.6	0.00379
TCZ W24 vs BL ONLY	PLS3	plastin 3	0.422	70.3	0.094	0.00544	72.8	0.982	-0.622	68.4	0.0317
TCZ W24 vs BL ONLY	PLSCR1	phospholipid scramblase 1	-1.02	28.7	0.224	-0.177	20.7	0.411	0.92	35.9	0.0446
TCZ W24 vs BL ONLY	PLXNA2	plexin A2	0.642	2.57	0.471	-0.0807	2.87	0.625	-1.75	1.5	0.02
TCZ W24 vs BL ONLY	PMAIP1	phorbol-12-myristate-13-acetate-induced protein 1	-0.192	7.79	0.837	-0.203	5.87	0.463	0.691	11.3	0.0193
TCZ W24 vs BL ONLY	PMM1	phosphomannomutase 1	-0.458	20	0.255	0.0954	18.1	0.479	0.646	31.1	0.0383
TCZ W24 vs BL ONLY	PMM2	phosphomannomutase 2	0.559	18.3	0.016	-0.0207	19	0.911	-0.637	16.9	0.0149
TCZ W24 vs BL ONLY	PNISR	PNN-interacting serine/arginine-rich protein	-0.253	3.51	0.558	0.0806	2.68	0.588	0.727	4.58	0.0191
TCZ W24 vs BL ONLY	PNKD	paroxysmal nonkinesigenic dyskinesia	-0.722	4.96	0.114	0.0441	3.21	0.87	0.629	7.65	0.0466
TCZ W24 vs BL ONLY	PNRC1	proline-rich nuclear receptor coactivator 1	-0.759	13.4	0.206	0.00766	14.8	0.981	1.34	16	0.00426
TCZ W24 vs BL ONLY	POGK	pogo transposable element with KRAB domain	0.206	12.7	0.558	-0.0578	13.2	0.65	-0.679	8.38	0.0252
TCZ W24 vs BL ONLY	POLB	polymerase (DNA directed), beta	0.00616	3.28	0.995	-0.0265	2.84	0.955	1.18	7.88	0.0268
TCZ W24 vs BL ONLY	POLG2	polymerase (DNA directed), gamma 2, accessory subunit	-0.233	1.23	0.726	-0.129	1.14	0.785	0.7	1.64	0.0367
TCZ W24 vs BL ONLY	POLI	polymerase (DNA directed) iota	-0.259	1.39	0.512	0.044	1.37	0.872	0.745	2.19	0.0128
TCZ W24 vs BL ONLY	POLL	polymerase (DNA directed), lambda	-0.496	3.35	0.091	0.0134	3.37	0.966	0.791	3.62	0.00952
TCZ W24 vs BL ONLY	POLR1A	polymerase (RNA) I polypeptide A, 194kDa	0.569	7.36	0.188	-0.0459	8.78	0.716	-0.708	4.75	0.0344
TCZ W24 vs BL ONLY	POLR1B	polymerase (RNA) I polypeptide B, 128kDa	0.457	3.45	0.287	-0.164	3.87	0.204	-0.882	2.22	0.0092
TCZ W24 vs BL ONLY	POLR3D	polymerase (RNA) III (DNA directed) polypeptide D, 44kDa	0.542	23.9	0.0617	-0.0268	25.5	0.867	-0.883	16.9	0.0136
TCZ W24 vs BL ONLY	POLR3E	polymerase (RNA) III (DNA directed) polypeptide E (80kD)	0.269	5.33	0.343	-0.0344	5.8	0.887	-0.592	3.77	0.0458
TCZ W24 vs BL ONLY	POM121C	POM121 transmembrane nucleoporin C	0.265	1.9	0.654	0.0208	2.04	0.931	-0.741	1.21	0.029
TCZ W24 vs BL ONLY	POMT2	protein-O-mannosyltransferase 2	0.568	5.88	0.103	-0.0428	7.34	0.769	-0.682	4.41	0.046
TCZ W24 vs BL ONLY	PPAN	peter pan homolog (Drosophila)	0.206	11.5	0.675	-0.00483	11.1	0.991	-0.822	8.93	0.0124
TCZ W24 vs BL ONLY	PPAP2B	phosphatidic acid phosphatase type 2B	-1.06	63.5	0.0583	0.0646	64.8	0.619	1.61	72.7	0.00928
TCZ W24 vs BL ONLY	PPAPDC2	phosphatidic acid phosphatase type 2 domain containing 2	0.0424	1.4	0.948	-0.0955	1.25	0.803	0.843	1.68	0.0116
TCZ W24 vs BL ONLY	PPARD	peroxisome proliferator-activated receptor delta	0.78	30.9	0.322	-0.0988	28.7	0.46	-1.37	15.8	0.0112
TCZ W24 vs BL ONLY	PPARG	peroxisome proliferator-activated receptor gamma	-0.729	0.774	0.573	-0.109	0.454	0.849	1.38	2.14	0.00414
TCZ W24 vs BL ONLY	PPAT	phosphoribosyl pyrophosphate amidotransferase	0.326	2.43	0.344	-0.0767	2.4	0.763	-0.948	1.89	0.0067
TCZ W24 vs BL ONLY	PPCDC	phosphopantothenoylcysteine decarboxylase	0.198	0.733	0.786	0.177	0.887	0.691	0.834	1.23	0.045
TCZ W24 vs BL ONLY	PPCS	phosphopantothenoylcysteine synthetase	-0.412	6.63	0.214	0.0867	6	0.587	0.629	9.22	0.0498
TCZ W24 vs BL ONLY	PPIL3	peptidylprolyl isomerase (cyclophilin)-like 3	-0.247	7.69	0.762	-0.00163	6.7	0.998	1.02	16.8	0.0307
TCZ W24 vs BL ONLY	PPM1K	protein phosphatase, Mg2+/Mn2+ dependent, 1K	-0.884	0.853	0.0912	0.0161	0.73	0.977	0.964	1.03	0.0147
TCZ W24 vs BL ONLY	PPME1	protein phosphatase methylesterase 1	0.838	13.8	0.0549	-0.00651	16.7	0.978	-0.907	12.5	0.0125
TCZ W24 vs BL ONLY	PPP1R12A	protein phosphatase 1, regulatory subunit 12A	0.548	16.4	0.0646	0.0309	20.2	0.853	-0.763	12.6	0.0137
TCZ W24 vs BL ONLY	PPP1R15B	protein phosphatase 1, regulatory subunit 15B	0.317	9.24	0.523	-0.0632	11.8	0.602	-0.684	5.86	0.0202
TCZ W24 vs BL ONLY	PPP2CB	protein phosphatase 2, catalytic subunit, beta isozyme	0.337	35.2	0.333	-0.0394	34.6	0.813	-0.765	25.7	0.0103
TCZ W24 vs BL ONLY	PPP2R3A	protein phosphatase 2, regulatory subunit B'', alpha	0.282	8.06	0.503	-0.124	10.1	0.293	-0.671	4.95	0.0203
TCZ W24 vs BL ONLY	PPP3CA	protein phosphatase 3, catalytic subunit, alpha isozyme	0.668	16	0.177	-0.0725	21.7	0.557	-0.918	11.3	0.0209
TCZ W24 vs BL ONLY	PPP6R1	protein phosphatase 6, regulatory subunit 1	0.373	24.2	0.226	0.042	26.2	0.759	-0.625	15.7	0.0377
TCZ W24 vs BL ONLY	PPRC1	peroxisome proliferator-activated receptor gamma, coactivator-related 1	0.293	13.1	0.556	0.0307	13.9	0.833	-0.869	8.74	0.023
TCZ W24 vs BL ONLY	PPTC7	PTC7 protein phosphatase homolog (S. cerevisiae)	0.0677	3.69	0.898	-0.035	3.75	0.895	-0.701	2.48	0.0135
TCZ W24 vs BL ONLY	PRDM1	PR domain containing 1, with ZNF domain	1.09	3.51	0.139	-0.176	4.44	0.0985	-1.93	1.28	0.00342
TCZ W24 vs BL ONLY	PREP	prolyl endopeptidase	0.538	13.7	0.0114	-0.0205	15.6	0.898	-0.687	12.1	0.0126
TCZ W24 vs BL ONLY	PRICKLE4	prickle homolog 4 (Drosophila)	-0.00916	1	0.991	-0.297	0.686	0.608	0.964	1.54	0.0316
TCZ W24 vs BL ONLY	PRIM1	primase, DNA, polypeptide 1 (49kDa)	-0.721	0.761	0.585	0.144	1.16	0.764	1.74	1.33	0.0182
TCZ W24 vs BL ONLY	PRIM2	primase, DNA, polypeptide 2 (58kDa)	-0.59	1.96	0.285	0.186	1.79	0.461	0.774	3.13	0.0225
TCZ W24 vs BL ONLY	PRIMPOL	primase and polymerase (DNA-directed)	-0.455	2.11	0.48	0.0241	2.03	0.952	1.22	4.01	0.0154
TCZ W24 vs BL ONLY	PRKCI	protein kinase C, iota	0.426	7.45	0.378	-0.0424	5.93	0.813	-0.652	8.1	0.0145
TCZ W24 vs BL ONLY	PRPF4	pre-mRNA processing factor 4	0.338	10.9	0.119	-0.0606	11	0.67	-0.614	9.14	0.0127
TCZ W24 vs BL ONLY	PRR5L	proline rich 5 like	1.58	5.84	0.0634	0.0343	6.42	0.847	-3.11	1.9	0.00404
TCZ W24 vs BL ONLY	PRRC1	proline-rich coiled-coil 1	0.445	27	0.222	-0.0487	31.3	0.673	-0.796	17.9	0.0223
TCZ W24 vs BL ONLY	PRUNE2	prune homolog 2 (Drosophila)	-0.437	1.92	0.779	0.0353	1.2	0.912	-0.746	2.39	0.0398
TCZ W24 vs BL ONLY	PSD4	pleckstrin and Sec7 domain containing 4	0.725	2.6	0.378	-0.0846	3.35	0.605	-0.747	1.59	0.048
TCZ W24 vs BL ONLY	PSMB9		-1.11	18.9	0.0812	-0.0562	8.84	0.881	1.16	28	0.0149
TCZ W24 vs BL ONLY	PSME4	proteasome (prosome, macropain) activator subunit 4	0.755	17.5	0.091	-0.0484	17.8	0.718	-1.41	13.8	0.00785
TCZ W24 vs BL ONLY	PSTK	phosphoseryl-tRNA kinase	-0.0208	0.654	0.985	0.209	0.592	0.713	1	1.03	0.0464
TCZ W24 vs BL ONLY	PTBP1	polypyrimidine tract binding protein 1	0.282	71.3	0.558	-0.051	72	0.621	-0.77	43.5	0.0228
TCZ W24 vs BL ONLY	PTBP2	polypyrimidine tract binding protein 2	-0.363	1.39	0.334	-0.0392	1.27	0.917	0.8	1.97	0.00969
TCZ W24 vs BL ONLY	PTBP3	polypyrimidine tract binding protein 3	0.0481	6.98	0.938	-0.0232	7.56	0.911	-0.671	4.16	0.0102
TCZ W24 vs BL ONLY	PTGFR	prostaglandin F receptor (FP)	-0.911	2.3	0.306	0.0409	3.76	0.853	1.83	2.31	0.00653
TCZ W24 vs BL ONLY	PTGIR	prostaglandin I2 (prostacyclin) receptor (IP)	-0.891	3.04	0.0962	0.135	3.17	0.467	0.77	3	0.0124
TCZ W24 vs BL ONLY	PTGS1	prostaglandin-endoperoxide synthase 1 (prostaglandin G/H synthase and cyclooxygenase)	1.13	14.1	0.26	-0.106	15.7	0.422	-1.11	21.8	0.00729
TCZ W24 vs BL ONLY	PTP4A1	protein tyrosine phosphatase type IVA, member 1	0.517	34.7	0.0359	-0.0845	35.4	0.429	-0.911	29.5	0.00672
TCZ W24 vs BL ONLY	PTPN21	protein tyrosine phosphatase, non-receptor type 21	0.387	14.2	0.425	-0.03	14.6	0.847	-0.958	7.78	0.0284
TCZ W24 vs BL ONLY	PTPRE	protein tyrosine phosphatase, receptor type, E	0.588	1.59	0.681	-0.246	1.09	0.226	-2.22	1.11	0.0121
TCZ W24 vs BL ONLY	PTPRF	protein tyrosine phosphatase, receptor type, F	0.749	10.9	0.103	0.0254	13	0.869	-0.803	8.66	0.0302
TCZ W24 vs BL ONLY	PTPRJ	protein tyrosine phosphatase, receptor type, J	0.784	3.23	0.231	-0.0158	3.66	0.948	-1.13	1.59	0.0151
TCZ W24 vs BL ONLY	PTPRK	protein tyrosine phosphatase, receptor type, K	0.428	15	0.391	-0.0457	16.9	0.736	-0.852	9.44	0.0343
TCZ W24 vs BL ONLY	PTRF	polymerase I and transcript release factor	0.598	401	0.217	-0.0476	496	0.621	-1.02	239	0.00636
TCZ W24 vs BL ONLY	PTX3	pentraxin 3, long	-2.89	96.3	0.0524	-0.241	79.9	0.132	2.01	67.6	0.00352
TCZ W24 vs BL ONLY	PURA	purine-rich element binding protein A	0.15	5.52	0.728	-0.0149	5.81	0.952	-0.672	3.81	0.0382
TCZ W24 vs BL ONLY	PURB	purine-rich element binding protein B	0.452	9.8	0.26	-0.0488	10.6	0.749	-1.15	6.77	0.00733
TCZ W24 vs BL ONLY	PUS1	pseudouridylate synthase 1	0.466	7.74	0.355	0.039	8.36	0.883	-1.07	5.6	0.0202
TCZ W24 vs BL ONLY	PXDN	peroxidasin homolog (Drosophila)	0.66	157	0.223	0.0365	169	0.744	-0.782	110	0.0358
TCZ W24 vs BL ONLY	PXK	PX domain containing serine/threonine kinase	-0.594	10.2	0.224	0.0465	10.6	0.813	0.879	10.4	0.0258
TCZ W24 vs BL ONLY	PXMP4	peroxisomal membrane protein 4, 24kDa	-0.317	1.05	0.564	0.0935	1.19	0.714	0.834	1.34	0.0352
TCZ W24 vs BL ONLY	PYGO1	pygopus family PHD finger 1	0.637	1.53	0.176	-0.138	1.65	0.493	-0.929	1.32	0.0217
TCZ W24 vs BL ONLY	PYROXD2	pyridine nucleotide-disulphide oxidoreductase domain 2	-0.871	2.77	0.103	-0.106	2.75	0.655	0.799	3.54	0.00987
TCZ W24 vs BL ONLY	QTRTD1	queuine tRNA-ribosyltransferase domain containing 1	0.713	5.38	0.198	-0.0543	5.75	0.796	-1.23	2.67	0.0112
TCZ W24 vs BL ONLY	RAB21	RAB21, member RAS oncogene family	0.415	13.7	0.188	-0.0793	14.2	0.524	-0.714	9.25	0.00993
TCZ W24 vs BL ONLY	RAB23	RAB23, member RAS oncogene family	0.435	17.5	0.368	-0.015	15.2	0.949	-0.627	15.3	0.018
TCZ W24 vs BL ONLY	RAB38	RAB38, member RAS oncogene family	-1.74	0.892	0.22	0.111	0.174	0.888	1.34	1.26	0.00308
TCZ W24 vs BL ONLY	RAB3D	RAB3D, member RAS oncogene family	-1.52	0.607	0.0231	0.0518	0.475	0.939	1.79	1.13	0.00438
TCZ W24 vs BL ONLY	RAB9A	RAB9A, member RAS oncogene family	-0.447	11.3	0.377	-0.0112	9.05	0.978	0.969	18.3	0.0302
TCZ W24 vs BL ONLY	RAD51C	RAD51 paralog C	-0.448	3.19	0.214	0.0548	3.34	0.874	0.654	3.5	0.024
TCZ W24 vs BL ONLY	RALGDS	ral guanine nucleotide dissociation stimulator	-0.514	3.18	0.215	0.0885	3.33	0.699	0.762	3.97	0.0243
TCZ W24 vs BL ONLY	RANBP2	RAN binding protein 2	0.335	6.61	0.687	-0.0487	8.39	0.709	-0.787	3.34	0.0492
TCZ W24 vs BL ONLY	RAPGEF2	Rap guanine nucleotide exchange factor (GEF) 2	0.927	6.51	0.107	-0.0687	6.67	0.572	-0.855	3.75	0.0203
TCZ W24 vs BL ONLY	RAPH1	Ras association (RalGDS/AF-6) and pleckstrin homology domains 1	-0.405	6.84	0.64	-0.128	7.58	0.395	-1.12	4.59	0.032
TCZ W24 vs BL ONLY	RARA	retinoic acid receptor, alpha	0.817	8.83	0.126	0.0726	9.75	0.584	-1.29	6.31	0.00463
TCZ W24 vs BL ONLY	RARB	retinoic acid receptor, beta	-0.353	0.692	0.815	0.263	0.685	0.281	1.93	1.11	0.00792
TCZ W24 vs BL ONLY	RARG	retinoic acid receptor, gamma	-1.02	15.1	0.0675	0.0525	16.4	0.724	0.816	8.98	0.0112
TCZ W24 vs BL ONLY	RARRES3	retinoic acid receptor responder (tazarotene induced) 3	-0.955	7.31	0.484	-0.0581	2.96	0.897	1.37	21.2	0.00663
TCZ W24 vs BL ONLY	RASA2	RAS p21 protein activator 2	0.51	3.97	0.484	-0.139	3.21	0.337	-1.36	2.84	0.0125
TCZ W24 vs BL ONLY	RASAL2	RAS protein activator like 2	0.879	4.79	0.262	-0.126	6.86	0.238	-1.2	2.25	0.00357
TCZ W24 vs BL ONLY	RASD1	RAS, dexamethasone-induced 1	0.247	1.6	0.905	0.122	0.828	0.77	-2.08	1.62	0.0122
TCZ W24 vs BL ONLY	RASD2	RASD family, member 2	2.88	1.03	0.177	-0.0052	1.25	0.995	-3.37	1.29	0.00874
TCZ W24 vs BL ONLY	RASGRF2	Ras protein-specific guanine nucleotide-releasing factor 2	2.85	0.19	0.393	-0.0471	0.182	0.906	-1	1.78	0.0316
TCZ W24 vs BL ONLY	RASL12	RAS-like, family 12	0.197	1	0.935	-0.163	1.28	0.591	0.799	3.96	0.0274
TCZ W24 vs BL ONLY	RASSF4	Ras association (RalGDS/AF-6) domain family member 4	-0.577	0.466	0.648	0.167	0.255	0.788	1.25	1.61	0.00755
TCZ W24 vs BL ONLY	RASSF8	Ras association (RalGDS/AF-6) domain family (N-terminal) member 8	-0.32	12.6	0.575	-0.0988	12.9	0.461	-0.835	7.84	0.0195
TCZ W24 vs BL ONLY	RB1	retinoblastoma 1	0.32	11	0.443	-0.126	11.4	0.323	-0.605	7.67	0.0301
TCZ W24 vs BL ONLY	RBM12	RNA binding motif protein 12	0.272	14.9	0.346	-0.0253	14.8	0.853	-0.823	11.1	0.00634
TCZ W24 vs BL ONLY	RBM14	RNA binding motif protein 14	0.458	4.56	0.258	0.0488	7.23	0.755	-0.643	3.36	0.0175
TCZ W24 vs BL ONLY	RBM27	RNA binding motif protein 27	0.408	5.71	0.177	-0.0275	6.17	0.87	-0.699	4.11	0.0158
TCZ W24 vs BL ONLY	RBM28	RNA binding motif protein 28	0.386	5.16	0.221	-0.115	5.56	0.418	-0.657	4.12	0.035
TCZ W24 vs BL ONLY	RBM38	RNA binding motif protein 38	0.214	3.33	0.803	0.189	3.64	0.226	-0.987	3.18	0.0149
TCZ W24 vs BL ONLY	RBM43	RNA binding motif protein 43	-0.989	1.73	0.108	0.0109	1.44	0.984	1.95	3.99	0.00636
TCZ W24 vs BL ONLY	RBMS1	RNA binding motif, single stranded interacting protein 1	0.479	18.6	0.11	-0.0939	20	0.323	-0.85	11.3	0.0123
TCZ W24 vs BL ONLY	RBMXL1	RNA binding motif protein, X-linked-like 1	-0.505	2.16	0.178	0.0343	2.09	0.9	0.731	2.59	0.0243
TCZ W24 vs BL ONLY	RCAN1	regulator of calcineurin 1	1.13	15.5	0.0621	-0.0406	16.5	0.841	-0.972	18.1	0.0406
TCZ W24 vs BL ONLY	RCC2	regulator of chromosome condensation 2	-0.0375	18.3	0.962	-0.0223	21.9	0.895	-0.885	13.9	0.0456
TCZ W24 vs BL ONLY	RDH10	retinol dehydrogenase 10 (all-trans)	-0.161	8.61	0.865	-0.00128	6.82	0.998	0.592	13.2	0.0279
TCZ W24 vs BL ONLY	RDH5	retinol dehydrogenase 5 (11-cis/9-cis)	-0.0676	2.6	0.95	-0.00969	1.78	0.991	0.593	3.92	0.0405
TCZ W24 vs BL ONLY	REC8	REC8 meiotic recombination protein	-0.138	0.944	0.919	0.122	0.312	0.884	0.811	1.37	0.0135
TCZ W24 vs BL ONLY	RECQL5	RecQ protein-like 5	-0.226	1.32	0.529	0.153	1.4	0.469	0.936	1.56	0.0037
TCZ W24 vs BL ONLY	REST	RE1-silencing transcription factor	0.353	5.4	0.62	-0.0942	5.26	0.432	-1	3.69	0.0203
TCZ W24 vs BL ONLY	RFX8	RFX family member 8, lacking RFX DNA binding domain	-1.94	1.18	0.107	-0.0671	0.634	0.939	1.72	1.88	0.0124
TCZ W24 vs BL ONLY	RGL1	ral guanine nucleotide dissociation stimulator-like 1	-0.708	3.18	0.0851	0.117	3.15	0.467	0.673	2.94	0.0264
TCZ W24 vs BL ONLY	RGL3	ral guanine nucleotide dissociation stimulator-like 3	0.694	0.0621	0.834	0	0.0146	1	0.703	1.1	0.035
TCZ W24 vs BL ONLY	RGN	regucalcin	-0.603	2.02	0.381	0.085	0.908	0.868	0.792	2.43	0.0299
TCZ W24 vs BL ONLY	RGS10	regulator of G-protein signaling 10	-0.802	28.1	0.198	-0.102	18.9	0.531	0.878	60.4	0.042
TCZ W24 vs BL ONLY	RGS14	regulator of G-protein signaling 14	0.522	0.742	0.526	0.232	0.664	0.61	0.862	1.09	0.0256
TCZ W24 vs BL ONLY	RGS3	regulator of G-protein signaling 3	0.62	5.97	0.467	-0.0865	3.95	0.482	-1.22	6.99	0.0191
TCZ W24 vs BL ONLY	RIC1	RAB6A GEF complex partner 1	0.771	10.9	0.113	-0.0221	11.1	0.898	-1.37	6.74	0.00952
TCZ W24 vs BL ONLY	RIOK1	RIO kinase 1	0.321	9.49	0.271	-0.0608	9.9	0.7	-0.77	7.47	0.0115
TCZ W24 vs BL ONLY	RMI1	RecQ mediated genome instability 1	-0.277	1.66	0.744	-0.0158	2.39	0.971	0.835	2.99	0.0419
TCZ W24 vs BL ONLY	RMI2	RecQ mediated genome instability 2	-1.14	0.93	0.106	-0.0309	1.01	0.974	1.92	1.22	0.00441
TCZ W24 vs BL ONLY	RND3	Rho family GTPase 3	-0.127	61	0.875	0.000471	47.3	0.999	1.15	96.5	0.0164
TCZ W24 vs BL ONLY	RNF112	ring finger protein 112	-0.912	2.23	0.214	-0.0414	2.26	0.906	0.972	1.86	0.0253
TCZ W24 vs BL ONLY	RNF121	ring finger protein 121	0.497	9.91	0.00788	-0.0568	10.6	0.697	-0.599	9.45	0.0203
TCZ W24 vs BL ONLY	RNF141	ring finger protein 141	-0.186	6.03	0.523	-0.00445	5.92	0.992	0.592	6.76	0.0499
TCZ W24 vs BL ONLY	RNF207	ring finger protein 207	-0.41	0.731	0.481	0.127	0.466	0.785	0.929	1.03	0.00834
TCZ W24 vs BL ONLY	RNF217	ring finger protein 217	0.477	1.97	0.31	-0.0548	2.02	0.767	-0.878	1.34	0.0356
TCZ W24 vs BL ONLY	RNF6	ring finger protein (C3H2C3 type) 6	0.363	9.89	0.134	-0.00573	11.3	0.986	-0.599	8.86	0.0153
TCZ W24 vs BL ONLY	RNPC3	RNA-binding region (RNP1, RRM) containing 3	-0.175	1.2	0.775	-0.0453	1.17	0.938	0.845	1.91	0.00933
TCZ W24 vs BL ONLY	ROBO3	roundabout, axon guidance receptor, homolog 3 (Drosophila)	-0.527	1.27	0.131	0.148	1.08	0.542	0.662	1.63	0.0116
TCZ W24 vs BL ONLY	ROR2	receptor tyrosine kinase-like orphan receptor 2	-1.33	1.98	0.242	-0.0688	3.38	0.676	1.25	2.1	0.0126
TCZ W24 vs BL ONLY	RP2	retinitis pigmentosa 2 (X-linked recessive)	0.405	10.1	0.201	-0.0742	9.99	0.68	-0.665	11.4	0.0157
TCZ W24 vs BL ONLY	RPA3	replication protein A3, 14kDa	-0.392	2.71	0.666	0.0235	2.6	0.962	1.16	4.96	0.0471
TCZ W24 vs BL ONLY	RPP25L	ribonuclease P/MRP 25kDa subunit-like	-0.576	5.98	0.247	0.057	5.58	0.85	1.09	9.27	0.0157
TCZ W24 vs BL ONLY	RPS6KA6	ribosomal protein S6 kinase, 90kDa, polypeptide 6	1.74	0.731	0.0886	-0.115	0.584	0.64	-0.714	1.16	0.0196
TCZ W24 vs BL ONLY	RRAD	Ras-related associated with diabetes	0.433	4.78	0.885	0.0956	2.79	0.762	-2.03	7.88	0.00908
TCZ W24 vs BL ONLY	RRN3	RRN3 RNA polymerase I transcription factor homolog (S. cerevisiae)	0.512	6.8	0.0734	-0.0248	6.89	0.889	-0.698	5.82	0.00969
TCZ W24 vs BL ONLY	RRP1	ribosomal RNA processing 1	0.446	13.9	0.309	-0.0557	13.5	0.769	-1.11	9.68	0.0143
TCZ W24 vs BL ONLY	RRP12	ribosomal RNA processing 12 homolog (S. cerevisiae)	0.732	11.7	0.162	-0.0647	13.1	0.644	-1.21	5.99	0.0123
TCZ W24 vs BL ONLY	RRP15	ribosomal RNA processing 15 homolog (S. cerevisiae)	0.312	1.99	0.174	-0.0819	1.85	0.721	-0.613	1.83	0.0223
TCZ W24 vs BL ONLY	RRP1B	ribosomal RNA processing 1B	0.56	10.2	0.31	-0.067	10.8	0.566	-1.13	5.46	0.0187
TCZ W24 vs BL ONLY	RRP7A	ribosomal RNA processing 7 homolog A (S. cerevisiae)	0.501	5.52	0.205	-0.029	6.74	0.884	-0.628	4.1	0.0225
TCZ W24 vs BL ONLY	RRS1	RRS1 ribosome biogenesis regulator homolog (S. cerevisiae)	0.223	10.3	0.712	0.0386	11.4	0.848	-0.883	6.43	0.0128
TCZ W24 vs BL ONLY	RSC1A1	regulatory solute carrier protein, family 1, member 1	0.68	6.22	0.0688	-0.0365	6.24	0.897	-1.32	3.7	0.012
TCZ W24 vs BL ONLY	RSRP1	arginine/serine-rich protein 1	-0.445	3.83	0.611	0.0771	2.11	0.8	1.14	6.17	0.00999
TCZ W24 vs BL ONLY	RTP4	receptor (chemosensory) transporter protein 4	-1.38	5.04	0.0859	0.0323	3.6	0.972	1.79	4.98	0.00653
TCZ W24 vs BL ONLY	RTTN	rotatin	0.422	1.73	0.402	0.0483	2.29	0.827	-0.626	1.26	0.0241
TCZ W24 vs BL ONLY	RUNDC1	RUN domain containing 1	0.227	3.3	0.426	-0.0944	3.18	0.589	-0.601	2.99	0.0243
TCZ W24 vs BL ONLY	RUNX1	runt-related transcription factor 1	1.17	32.4	0.119	-0.0415	48.1	0.714	-1.88	17.4	0.00552
TCZ W24 vs BL ONLY	RWDD3	RWD domain containing 3	0.0522	3.5	0.962	0.146	3.48	0.58	0.961	9.32	0.028
TCZ W24 vs BL ONLY	RYBP		0.615	24.1	0.11	-0.116	23.8	0.325	-1.85	14.1	0.0029
TCZ W24 vs BL ONLY	S100A1	S100 calcium binding protein A1	-0.0874	0.939	0.931	-0.0421	0.502	0.981	1.08	1.33	0.0266
TCZ W24 vs BL ONLY	S1PR1	sphingosine-1-phosphate receptor 1	-0.693	2.52	0.541	0.13	2.86	0.687	1.64	4.27	0.0361
TCZ W24 vs BL ONLY	SAC3D1	SAC3 domain containing 1	-0.53	3.16	0.226	0.167	3.6	0.432	0.753	3.09	0.0225
TCZ W24 vs BL ONLY	SALL2	spalt-like transcription factor 2	-1.15	0.796	0.236	0.196	0.464	0.52	1.09	1.3	0.0202
TCZ W24 vs BL ONLY	SAMD1		0.0433	14.5	0.951	0.0734	22.4	0.626	-0.987	10.5	0.01
TCZ W24 vs BL ONLY	SAMD11	sterile alpha motif domain containing 11	0.863	20.9	0.282	0.191	33.6	0.0829	-2.04	16.5	0.00508
TCZ W24 vs BL ONLY	SAMD4A	sterile alpha motif domain containing 4A	0.583	16.7	0.316	-0.0374	15.4	0.795	-1.03	10.2	0.036
TCZ W24 vs BL ONLY	SAMD4B	sterile alpha motif domain containing 4B	0.195	22.3	0.732	0.00927	22.3	0.967	-0.731	15.5	0.0343
TCZ W24 vs BL ONLY	SAP30	Sin3A-associated protein, 30kDa	-0.948	2.39	0.0509	-0.0859	1.92	0.859	1.31	3.11	0.0402
TCZ W24 vs BL ONLY	SASH1	SAM and SH3 domain containing 1	-1.28	10.9	0.263	-0.004	11.3	0.988	1.39	5.3	0.00457
TCZ W24 vs BL ONLY	SAT2	spermidine/spermine N1-acetyltransferase family member 2	-0.342	19.1	0.5	0.0107	14.7	0.967	0.702	29	0.0321
TCZ W24 vs BL ONLY	SCARF2	scavenger receptor class F, member 2	0.746	26.6	0.106	0.169	30.7	0.164	-0.931	18.8	0.0076
TCZ W24 vs BL ONLY	SCD	stearoyl-CoA desaturase (delta-9-desaturase)	0.441	49	0.671	-0.0278	70.5	0.882	-1.47	39.4	0.0183
TCZ W24 vs BL ONLY	SCG2	secretogranin II	0.181	0.793	0.936	0.123	0.549	0.815	-1.53	1.3	0.026
TCZ W24 vs BL ONLY	SCHIP1	schwannomin interacting protein 1	0.548	8.7	0.204	0.0274	8.64	0.9	-0.758	8.65	0.0192
TCZ W24 vs BL ONLY	SCUBE3	signal peptide, CUB domain, EGF-like 3	1.31	4.52	0.317	-0.00206	15.8	0.995	-0.903	2.6	0.0468
TCZ W24 vs BL ONLY	SCX	scleraxis basic helix-loop-helix transcription factor	1.1	3.4	0.513	0.148	3.44	0.489	-3.43	1.94	0.00336
TCZ W24 vs BL ONLY	SDAD1	SDA1 domain containing 1	0.447	10.6	0.0492	-0.034	11	0.836	-0.604	9.56	0.0205
TCZ W24 vs BL ONLY	SDCBP2	syndecan binding protein (syntenin) 2	-0.292	0.958	0.765	-0.0317	0.513	0.972	0.839	1.78	0.0334
TCZ W24 vs BL ONLY	SEC23IP	SEC23 interacting protein	0.292	11.4	0.418	-0.0183	11.8	0.902	-0.769	7.7	0.022
TCZ W24 vs BL ONLY	SEC24A	SEC24 family member A	0.454	14.2	0.267	-0.103	14.4	0.238	-0.959	8.45	0.00905
TCZ W24 vs BL ONLY	SEC24B	SEC24 family member B	0.364	13.3	0.222	-0.0274	14.3	0.864	-0.673	9.36	0.0184
TCZ W24 vs BL ONLY	SEC24D	SEC24 family member D	0.327	69.7	0.26	-0.00876	86.1	0.952	-0.588	59.2	0.0388
TCZ W24 vs BL ONLY	SEH1L	SEH1-like (S. cerevisiae)	0.0775	10.7	0.817	-0.136	10.5	0.321	-0.742	9.97	0.0106
TCZ W24 vs BL ONLY	SELPLG	selectin P ligand	0.967	1.91	0.0512	-0.00734	2.3	0.991	-0.838	1.73	0.00847
TCZ W24 vs BL ONLY	SEMA3A	sema domain, immunoglobulin domain (Ig), short basic domain, secreted, (semaphorin) 3A	-0.693	2.66	0.385	-0.151	1.09	0.437	0.77	4.13	0.0129
TCZ W24 vs BL ONLY	SEMA3C	sema domain, immunoglobulin domain (Ig), short basic domain, secreted, (semaphorin) 3C	-0.0138	69.2	0.986	-0.0466	70.2	0.694	-0.858	43.5	0.0154
TCZ W24 vs BL ONLY	SEMA4B	sema domain, immunoglobulin domain (Ig), transmembrane domain (TM) and short cytoplasmic domain, (semaphorin) 4B	-0.864	1.08	0.394	-0.0034	0.77	0.997	1.44	2.14	0.00508
TCZ W24 vs BL ONLY	SEMA7A	semaphorin 7A, GPI membrane anchor (John Milton Hagen blood group)	0.982	102	0.171	-0.138	109	0.228	-3.25	53.7	0.0037
TCZ W24 vs BL ONLY	SENP5	SUMO1/sentrin specific peptidase 5	0.303	6.67	0.19	-0.0431	6.56	0.801	-0.627	6.14	0.013
TCZ W24 vs BL ONLY	SENP8	SUMO/sentrin specific peptidase family member 8	-0.179	0.68	0.846	0.169	0.823	0.699	1.11	1.37	0.0351
TCZ W24 vs BL ONLY	SEPP1	selenoprotein P, plasma, 1	-0.179	8.74	0.898	-0.107	5.92	0.529	0.87	18	0.0468
TCZ W24 vs BL ONLY	SEPSECS	Sep (O-phosphoserine) tRNA:Sec (selenocysteine) tRNA synthase	-0.275	1.14	0.674	0.111	1.25	0.719	0.888	1.68	0.0122
TCZ W24 vs BL ONLY	SEPT11	septin 11	0.0341	118	0.953	-0.0826	148	0.467	-0.653	93.1	0.0435
TCZ W24 vs BL ONLY	SERBP1	SERPINE1 mRNA binding protein 1	0.165	12.7	0.744	-0.0798	15.4	0.518	-0.608	8.18	0.0349
TCZ W24 vs BL ONLY	SERINC5	serine incorporator 5	0.685	4.76	0.342	-0.074	7.32	0.537	-1.08	2.12	0.00713
TCZ W24 vs BL ONLY	SERP1	stress-associated endoplasmic reticulum protein 1	0.504	62.2	0.0449	-0.0555	64.2	0.589	-0.708	57	0.0163
TCZ W24 vs BL ONLY	SERPINB1	serpin peptidase inhibitor, clade B (ovalbumin), member 1	-0.699	5.86	0.0701	0.125	5.1	0.382	0.828	10.1	0.0316
TCZ W24 vs BL ONLY	SERPINE2	serpin peptidase inhibitor, clade E (nexin, plasminogen activator inhibitor type 1), member 2	-0.429	615	0.664	-0.0736	546	0.472	-1.96	466	0.0125
TCZ W24 vs BL ONLY	SERTAD1	SERTA domain containing 1	0.562	34.7	0.188	-0.0632	33.7	0.776	-1.12	41.8	0.0104
TCZ W24 vs BL ONLY	SESN1	sestrin 1	-0.507	4.22	0.447	0.0422	4.47	0.847	1.03	6.59	0.0191
TCZ W24 vs BL ONLY	SETD3	SET domain containing 3	0.369	16	0.0533	-0.0889	16	0.434	-0.691	14.3	0.00672
TCZ W24 vs BL ONLY	SETDB2	SET domain, bifurcated 2	-1.04	0.843	0.0023	-0.04	0.792	0.913	1.27	1.43	0.00935
TCZ W24 vs BL ONLY	SFPQ	splicing factor proline/glutamine-rich	0.198	27.4	0.733	-0.00679	27.1	0.981	-0.989	20.7	0.0228
TCZ W24 vs BL ONLY	SGCD	sarcoglycan, delta (35kDa dystrophin-associated glycoprotein)	0.237	23.1	0.708	-0.0415	24.1	0.802	-0.753	14.8	0.0155
TCZ W24 vs BL ONLY	SGCG	sarcoglycan, gamma (35kDa dystrophin-associated glycoprotein)	0.843	6.39	0.539	-0.0464	10	0.847	-1.58	2.34	0.00508
TCZ W24 vs BL ONLY	SGK1	serum/glucocorticoid regulated kinase 1	0.328	31.9	0.536	-0.143	30	0.165	-1.28	30.1	0.0055
TCZ W24 vs BL ONLY	SGPL1	sphingosine-1-phosphate lyase 1	0.671	9.37	0.122	-0.0374	12.6	0.797	-1.06	8.59	0.0103
TCZ W24 vs BL ONLY	SGPP1	sphingosine-1-phosphate phosphatase 1	0.355	8.19	0.267	-0.036	8.58	0.896	-0.671	7.2	0.0156
TCZ W24 vs BL ONLY	SH3BP5L	SH3-binding domain protein 5-like	0.804	24.8	0.0665	-0.0131	38.5	0.947	-1.11	21.5	0.00335
TCZ W24 vs BL ONLY	SH3RF1	SH3 domain containing ring finger 1	0.444	13.7	0.53	-0.0963	14.5	0.383	-1.38	9.53	0.00409
TCZ W24 vs BL ONLY	SHANK3	SH3 and multiple ankyrin repeat domains 3	1.35	2.28	0.0557	-0.00498	3.1	0.991	-1.14	1.44	0.0277
TCZ W24 vs BL ONLY	SHB	Src homology 2 domain containing adaptor protein B	0.636	10.3	0.323	-0.0403	9.39	0.795	-1.48	5.32	0.00433
TCZ W24 vs BL ONLY	SHC3	SHC (Src homology 2 domain containing) transforming protein 3	-0.788	0.702	0.341	-0.129	0.332	0.637	0.93	1.05	0.0262
TCZ W24 vs BL ONLY	SHOC2	soc-2 suppressor of clear homolog (C. elegans)	0.319	21.5	0.208	-0.0333	22.1	0.86	-0.83	17	0.00959
TCZ W24 vs BL ONLY	SHQ1	SHQ1, H/ACA ribonucleoprotein assembly factor	0.358	11.1	0.259	-0.0989	10.3	0.479	-0.725	10.1	0.00952
TCZ W24 vs BL ONLY	SIK2	salt-inducible kinase 2	-0.268	3.15	0.388	0.00493	2.81	0.991	0.667	3.79	0.0302
TCZ W24 vs BL ONLY	SIMC1	SUMO-interacting motifs containing 1	0.447	1.81	0.299	0.0443	2.01	0.882	-0.838	1.46	0.0125
TCZ W24 vs BL ONLY	SIPA1L3	signal-induced proliferation-associated 1 like 3	0.537	4.62	0.45	-0.0999	5.33	0.337	-1.33	2.36	0.0256
TCZ W24 vs BL ONLY	SIRPA	signal-regulatory protein alpha	1.01	48.8	0.0597	0.0104	54.8	0.949	-1.67	30.4	0.00338
TCZ W24 vs BL ONLY	SIRT3	sirtuin 3	-0.498	3.37	0.0362	0.0585	3.42	0.8	0.619	3.71	0.0224
TCZ W24 vs BL ONLY	SIRT5	sirtuin 5	-0.425	0.802	0.26	0.0694	0.817	0.825	0.964	1.22	0.00658
TCZ W24 vs BL ONLY	SIX1	SIX homeobox 1	-0.103	2.82	0.896	0.0542	3.79	0.851	1.7	3.88	0.00834
TCZ W24 vs BL ONLY	SKI	SKI proto-oncogene	0.154	34.6	0.861	0.103	43.6	0.223	-0.916	20.8	0.0356
TCZ W24 vs BL ONLY	SLAIN2	SLAIN motif family, member 2	0.173	11.1	0.705	-0.00558	13.3	0.986	-0.665	7.93	0.0111
TCZ W24 vs BL ONLY	SLC10A3	solute carrier family 10, member 3	0.346	23	0.208	0.02	24.2	0.917	-0.786	18.4	0.00834
TCZ W24 vs BL ONLY	SLC12A2	solute carrier family 12 (sodium/potassium/chloride transporter), member 2	0.687	4.36	0.226	-0.102	5.62	0.455	-1.24	2.31	0.0334
TCZ W24 vs BL ONLY	SLC16A1	solute carrier family 16 (monocarboxylate transporter), member 1	0.453	18.6	0.422	-0.0345	27.2	0.797	-1.05	9.51	0.004
TCZ W24 vs BL ONLY	SLC16A3	solute carrier family 16 (monocarboxylate transporter), member 3	0.381	45.7	0.691	0.0126	43.3	0.95	-0.741	46.5	0.0338
TCZ W24 vs BL ONLY	SLC16A5	solute carrier family 16 (monocarboxylate transporter), member 5	-0.618	1.62	0.379	0.13	1.73	0.566	0.773	1.13	0.0379
TCZ W24 vs BL ONLY	SLC18B1	solute carrier family 18, subfamily B, member 1	-0.278	2.16	0.571	-0.0956	2.05	0.772	0.609	3.19	0.0235
TCZ W24 vs BL ONLY	SLC25A13	solute carrier family 25 (aspartate/glutamate carrier), member 13	0.873	2.9	0.0604	-0.11	2.86	0.615	-1.23	2.24	0.00525
TCZ W24 vs BL ONLY	SLC25A17	solute carrier family 25 (mitochondrial carrier; peroxisomal membrane protein, 34kDa), member 17	0.297	7.55	0.158	-0.143	6.85	0.296	-0.591	7.59	0.0208
TCZ W24 vs BL ONLY	SLC25A19	solute carrier family 25 (mitochondrial thiamine pyrophosphate carrier), member 19	0.208	2.6	0.659	-0.0224	2.26	0.966	-0.685	2.11	0.0294
TCZ W24 vs BL ONLY	SLC25A29	solute carrier family 25 (mitochondrial carnitine/acylcarnitine carrier), member 29	-0.515	1.29	0.293	-0.116	1.21	0.557	0.725	1.7	0.0124
TCZ W24 vs BL ONLY	SLC25A42	solute carrier family 25, member 42	0.0607	1.66	0.92	0.152	1.98	0.518	0.714	1.83	0.0241
TCZ W24 vs BL ONLY	SLC27A1	solute carrier family 27 (fatty acid transporter), member 1	-0.665	4.31	0.225	0.107	4.61	0.469	0.655	3.24	0.0357
TCZ W24 vs BL ONLY	SLC27A4	solute carrier family 27 (fatty acid transporter), member 4	0.599	9.39	0.056	-0.0336	13	0.848	-0.867	7.43	0.0124
TCZ W24 vs BL ONLY	SLC29A1	solute carrier family 29 (equilibrative nucleoside transporter), member 1	0.901	6.04	0.0516	-0.101	6.08	0.559	-0.692	5.9	0.0371
TCZ W24 vs BL ONLY	SLC2A12	solute carrier family 2 (facilitated glucose transporter), member 12	0.22	0.634	0.853	0.139	0.631	0.626	1.12	1.39	0.0223
TCZ W24 vs BL ONLY	SLC30A7	solute carrier family 30 (zinc transporter), member 7	0.28	5.14	0.578	-0.0952	5.44	0.442	-0.649	3.52	0.0336
TCZ W24 vs BL ONLY	SLC33A1	solute carrier family 33 (acetyl-CoA transporter), member 1	0.61	11.5	0.0597	-0.0345	12.9	0.807	-0.748	8.68	0.0134
TCZ W24 vs BL ONLY	SLC35A1	solute carrier family 35 (CMP-sialic acid transporter), member A1	-0.572	4.62	0.395	-0.0455	3.81	0.869	0.882	9.4	0.0384
TCZ W24 vs BL ONLY	SLC35A2	solute carrier family 35 (UDP-galactose transporter), member A2	0.331	11.2	0.302	0.0273	12.9	0.882	-0.605	8.47	0.0172
TCZ W24 vs BL ONLY	SLC35D2	solute carrier family 35 (UDP-GlcNAc/UDP-glucose transporter), member D2	-0.39	3.24	0.445	0.00719	2.26	0.989	0.618	4.45	0.0367
TCZ W24 vs BL ONLY	SLC35E2	solute carrier family 35, member E2	0.826	1.14	0.228	-0.0637	1.3	0.824	0.786	1.47	0.022
TCZ W24 vs BL ONLY	SLC35E2B	solute carrier family 35, member E2B	-0.471	4.32	0.287	0.0302	4.66	0.869	0.598	3.6	0.0255
TCZ W24 vs BL ONLY	SLC35F2	solute carrier family 35, member F2	0.464	6.67	0.495	-0.105	7.5	0.38	-1.54	5.22	0.00828
TCZ W24 vs BL ONLY	SLC36A1	solute carrier family 36 (proton/amino acid symporter), member 1	0.813	5.13	0.164	-0.0785	9.63	0.462	-0.907	2.94	0.0116
TCZ W24 vs BL ONLY	SLC38A2	solute carrier family 38, member 2	-0.298	164	0.612	0.0226	180	0.87	0.607	151	0.0464
TCZ W24 vs BL ONLY	SLC39A10	solute carrier family 39 (zinc transporter), member 10	0.462	7.83	0.0863	-0.197	8.45	0.0613	-0.878	6.26	0.00374
TCZ W24 vs BL ONLY	SLC40A1	solute carrier family 40 (iron-regulated transporter), member 1	-0.197	0.661	0.898	0.124	0.441	0.801	2.22	2.12	0.00338
TCZ W24 vs BL ONLY	SLC41A2	solute carrier family 41 (magnesium transporter), member 2	0.524	7.1	0.346	-0.0751	7.27	0.537	-1.24	4.13	0.00689
TCZ W24 vs BL ONLY	SLC43A1	solute carrier family 43 (amino acid system L transporter), member 1	-0.468	2.23	0.122	0.0489	2.2	0.891	0.621	2.66	0.0335
TCZ W24 vs BL ONLY	SLC43A2		-0.455	1.29	0.518	0.0581	1.51	0.8	1.16	1.34	0.00385
TCZ W24 vs BL ONLY	SLC46A3	solute carrier family 46, member 3	0.926	2.25	0.115	0.0542	3.11	0.858	-1.14	1.72	0.0106
TCZ W24 vs BL ONLY	SLC4A7	solute carrier family 4, sodium bicarbonate cotransporter, member 7	0.601	7.54	0.361	-0.169	5.77	0.296	-1.28	5.57	0.00755
TCZ W24 vs BL ONLY	SLC52A2	solute carrier family 52 (riboflavin transporter), member 2	0.558	35.3	0.0678	-0.0365	38.5	0.795	-0.845	26.7	0.0148
TCZ W24 vs BL ONLY	SLC5A10	solute carrier family 5 (sodium/sugar cotransporter), member 10	1.14	3.81	0.206	-0.131	3.74	0.558	-2.53	1.63	0.00324
TCZ W24 vs BL ONLY	SLC6A8	solute carrier family 6 (neurotransmitter transporter), member 8	0.492	5.54	0.251	-0.0559	6.46	0.774	-0.602	4.2	0.0362
TCZ W24 vs BL ONLY	SLC7A1	solute carrier family 7 (cationic amino acid transporter, y+ system), member 1	0.66	32.7	0.344	-0.00246	46.4	0.993	-1.82	18	0.0101
TCZ W24 vs BL ONLY	SLC7A11	solute carrier family 7 (anionic amino acid transporter light chain, xc- system), member 11	-0.93	6.69	0.172	0.116	6.58	0.479	0.842	6.75	0.0185
TCZ W24 vs BL ONLY	SLC7A5	solute carrier family 7 (amino acid transporter light chain, L system), member 5	1.24	39.3	0.0653	0.0228	70.5	0.897	-1.9	27.4	0.00338
TCZ W24 vs BL ONLY	SLC7A6	solute carrier family 7 (amino acid transporter light chain, y+L system), member 6	0.831	10.9	0.0837	-0.0324	10.3	0.813	-1.34	7.64	0.0126
TCZ W24 vs BL ONLY	SLC7A6OS	solute carrier family 7, member 6 opposite strand	0.369	9.1	0.287	-0.104	8.65	0.489	-0.643	7.53	0.0464
TCZ W24 vs BL ONLY	SLC8A1	solute carrier family 8 (sodium/calcium exchanger), member 1	1.04	5.17	0.0819	0.0357	7.75	0.827	-1.08	3.65	0.00801
TCZ W24 vs BL ONLY	SLC9A1	solute carrier family 9, subfamily A (NHE1, cation proton antiporter 1), member 1	0.479	21.3	0.339	0.0189	24.3	0.892	-1.23	14.3	0.0132
TCZ W24 vs BL ONLY	SLC9A3R1	solute carrier family 9, subfamily A (NHE3, cation proton antiporter 3), member 3 regulator 1	0.494	5.42	0.23	-0.0175	5.51	0.957	-0.628	4.79	0.0382
TCZ W24 vs BL ONLY	SMARCC1	SWI/SNF related, matrix associated, actin dependent regulator of chromatin, subfamily c, member 1	0.467	18.6	0.267	-0.0101	23.2	0.951	-0.622	13.6	0.0488
TCZ W24 vs BL ONLY	SMC5	structural maintenance of chromosomes 5	0.532	5.96	0.0604	-0.00203	7.01	0.996	-0.876	5.06	0.0212
TCZ W24 vs BL ONLY	SMCO4	single-pass membrane protein with coiled-coil domains 4	0.64	9.77	0.0734	-0.128	11.6	0.446	-1.29	7.65	0.00672
TCZ W24 vs BL ONLY	SMIM10	small integral membrane protein 10	-0.327	2.22	0.592	-0.00918	1.33	0.992	0.754	3.1	0.018
TCZ W24 vs BL ONLY	SMIM15	small integral membrane protein 15	0.289	18.3	0.295	-0.074	17.9	0.583	-0.612	15.1	0.0173
TCZ W24 vs BL ONLY	SMIM20	small integral membrane protein 20	-0.619	12.1	0.245	0.00575	10.2	0.99	0.951	21.9	0.0265
TCZ W24 vs BL ONLY	SMOX	spermine oxidase	0.496	10.2	0.622	0.0358	8.87	0.847	-0.91	9.31	0.0464
TCZ W24 vs BL ONLY	SMURF2	SMAD specific E3 ubiquitin protein ligase 2	0.377	15.9	0.657	-0.0683	13.6	0.586	-0.947	14.6	0.0268
TCZ W24 vs BL ONLY	SNAI2	snail family zinc finger 2	-0.807	56.6	0.458	-0.00642	48.2	0.978	1.36	48	0.0202
TCZ W24 vs BL ONLY	SNAP25	synaptosomal-associated protein, 25kDa	1.13	0.159	0.667	-0.187	0.0862	0.836	0.946	1.5	0.0411
TCZ W24 vs BL ONLY	SNAPC1	small nuclear RNA activating complex, polypeptide 1, 43kDa	0.902	8.24	0.0559	-0.0274	8.24	0.911	-0.672	11.8	0.0429
TCZ W24 vs BL ONLY	SNCAIP	synuclein, alpha interacting protein	0.397	2.75	0.762	0.0815	2.5	0.737	-1.11	2.06	0.0383
TCZ W24 vs BL ONLY	SNCG	synuclein, gamma (breast cancer-specific protein 1)	-0.917	1.39	0.488	0.0961	0.519	0.894	1.1	2.44	0.0339
TCZ W24 vs BL ONLY	SNN	stannin	-0.265	2.83	0.668	0.0306	2.65	0.917	0.685	3.38	0.0254
TCZ W24 vs BL ONLY	SNX11	sorting nexin 11	0.413	9.01	0.0986	0.0178	8.54	0.942	-0.752	8.86	0.0191
TCZ W24 vs BL ONLY	SNX2	sorting nexin 2	-0.484	4.35	0.202	0.00188	4.03	0.996	0.802	5.73	0.0335
TCZ W24 vs BL ONLY	SNX25	sorting nexin 25	0.545	4.83	0.416	0.0712	6.62	0.582	-0.95	3.49	0.00525
TCZ W24 vs BL ONLY	SNX30	sorting nexin family member 30	0.89	8.16	0.204	0.0139	12.2	0.938	-1.82	5.51	0.00672
TCZ W24 vs BL ONLY	SNX9	sorting nexin 9	0.343	75.5	0.594	-0.0808	75.6	0.378	-1.06	43.5	0.0105
TCZ W24 vs BL ONLY	SOD2	superoxide dismutase 2, mitochondrial	-0.655	82.8	0.563	-0.178	62.2	0.182	0.864	135	0.0101
TCZ W24 vs BL ONLY	SOWAHC	sosondowah ankyrin repeat domain family member C	0.0128	4.21	0.992	-0.135	6.5	0.404	-1.03	2.49	0.00799
TCZ W24 vs BL ONLY	SOX4	SRY (sex determining region Y)-box 4	1.19	23.5	0.22	0.0245	27.1	0.88	-0.986	14.9	0.0326
TCZ W24 vs BL ONLY	SPARC	secreted protein, acidic, cysteine-rich (osteonectin)	0.451	2420	0.507	-0.00537	3240	0.976	-0.946	1360	0.0209
TCZ W24 vs BL ONLY	SPATA5L1	spermatogenesis associated 5-like 1	0.351	2.64	0.332	-0.0201	2.56	0.96	-0.732	2.2	0.0129
TCZ W24 vs BL ONLY	SPATA7	spermatogenesis associated 7	-0.605	2.62	0.142	-0.00512	2.47	0.993	1.07	3.64	0.0129
TCZ W24 vs BL ONLY	SPDL1	spindle apparatus coiled-coil protein 1	0.187	31.1	0.762	0.0427	27.4	0.769	-2.36	26.5	0.0152
[truncated: 304 more rows]
